# Supplementary material for: A Stromal Lysolipid–Autotaxin Signaling Axis Promotes Pancreatic Tumor Progression
Source: Oxford University Press journal article supplement (doi:10.1158/2159-8290.cd-18-1212), 2019-03-05
Supplement: 21598290cd181212-sup-210399_2_supp_5369227_pnjzm2.xlsx [file 21598290cd181212-sup-210399_2_supp_5369227_pnjzm2.xlsx]

## Sheet: Pre-activated and activated PSC
Identifying intracellular lipids in pre-activated (day 3) vs activated (day 7) PSC
LipidMolec	Class	Calc Mass	Formula	BaseRt	MainIon	MainArea[c]	MainArea[s1]	NMARatio[s1/c]		Pre-activated	Activated	Activated/Pre-activated
Cer(d32:0)	Cer	511.496	C32 H65 O3 N1	20.14	+H	5868000	4339000	0.739		0.807381	0.444003	0.54993
Cer(d34:0)	Cer	539.528	C34 H69 O3 N1	19.594	+H	6891000	3733000	0.542		0.948136	0.381992	0.402887
Cer(d34:1)	Cer	537.512	C34 H67 O3 N1	18.913	+H	58430000	57390000	0.982		8.03941	5.87263	0.73048
Cer(d36:0)	Cer	567.559	C36 H73 O3 N1	23.669	+H	5225000	4986000	0.954		0.71891	0.510209	0.709698
Cer(d38:0)	Cer	595.59	C38 H77 O3 N1	25.086	+H	3909000	3598000	0.92		0.537841	0.368178	0.684547
Cer(d40:1)	Cer	621.606	C40 H79 O3 N1	24.029	+H	1584000	2872000	1.813		0.217943	0.293887	1.34846
Cer(d40:2)	Cer	619.59	C40 H77 O3 N1	22.742	+H	2579000	718200	0.278		0.354846	0.0734923	0.20711
Cer(d42:1)	Cer	649.637	C42 H83 O3 N1	25.314	+H	1444000	9174000	6.351		0.198681	0.938761	4.72497
Cer(d42:2)	Cer	647.622	C42 H81 O3 N1	23.977	+H	10580000	18580000	1.757		1.45571	1.90126	1.30607
Cer(d42:3)	Cer	645.606	C42 H79 O3 N1	22.667	+H	9658000	8366000	0.866		1.32885	0.856079	0.644226
CerG1(d34:1)	CerG1	699.565	C40 H77 O8 N1	17.241	+H	80220000	98160000	1.224		11.0375	10.0446	0.910038
CerG1(d34:2)	CerG1	697.549	C40 H75 O8 N1	15.456	+H	1329000	1808000	1.36		0.182858	0.18501	1.01177
CerG1(d40:1)	CerG1	783.659	C46 H89 O8 N1	22.696	+H	5082000	4174000	0.821		0.699235	0.427119	0.610837
CerG1(d42:1)	CerG1	811.69	C48 H93 O8 N1	24.121	+H	3219000	14500000	4.505		0.442904	1.48376	3.35008
CerG1(d42:2)	CerG1	809.674	C48 H91 O8 N1	22.612	+H	7654000	18930000	2.473		1.05312	1.93708	1.83937
CerG1(d42:3)	CerG1	807.659	C48 H89 O8 N1	21.253	+H	1210000	2090000	1.728		0.166485	0.213866	1.2846
CerG2(d34:1)	CerG2	861.618	C46 H87 O13 N1	16.547	+H	19370000	6842000	0.353		2.66513	0.700131	0.262701
CerG2(d42:1)	CerG2	973.743	C54 H103 O13 N1	23.558	+H	860700	2074000	2.409		0.118424	0.212229	1.79211
CerG2(d42:2)	CerG2	971.727	C54 H101 O13 N1	22.019	+H	3447000	2454000	0.712		0.474274	0.251114	0.52947
CerG3(d34:1)	CerG3	1023.67	C52 H97 O18 N1	16.093	+H	14910000	3882000	0.26		2.05147	0.397239	0.193636
DG(34:1)	DG	594.522	C37 H70 O5	22.161	+NH4	13870000	10660000	0.769		60.0467	24.9139	0.414909
DG(36:2)	DG	620.538	C39 H72 O5	22.274	+NH4	8239000	11160000	1.355		35.6687	26.0825	0.731242
DG(36:3)	DG	618.522	C39 H70 O5	20.977	+NH4	4327000	1887000	0.436		18.7327	4.41018	0.235427
DG(36:4)	DG	616.507	C39 H68 O5	20.466	+NH4	11720000	7340000	0.626		50.7388	17.1546	0.338096
DG(38:3)	DG	646.554	C41 H74 O5	23.152	+NH4	4052000	14610000	3.606		17.5421	34.1456	1.94649
DG(38:4)	DG	644.538	C41 H72 O5	22.133	+NH4	37540000	55060000	1.467		162.52	128.683	0.791797
DG(38:5)	DG	642.522	C41 H70 O5	20.545	+NH4	12570000	17450000	1.388		54.4187	40.7831	0.749431
LPC(16:0)	LPC	495.332	C24 H50 O7 N1 P1	4.392	+H	318200000	376400000	1.183		14.3845	18.4561	1.28305
LPC(16:0e)	LPC	481.353	C24 H52 O6 N1 P1	5.392	+H	5388000	8927000	1.657		0.24357	0.437719	1.7971
LPC(16:0p)	LPC	479.338	C24 H50 O6 N1 P1	5.337	+H	4559000	8964000	1.966		0.206094	0.439533	2.13268
LPC(16:1)	LPC	493.317	C24 H48 O7 N1 P1	2.488	+H	3776000	5314000	1.407		0.170698	0.260562	1.52645
LPC(16:1p)	LPC	477.322	C24 H48 O6 N1 P1	4.471	+H	696700	760500	1.092		0.031495	0.0372897	1.18399
LPC(18:0)	LPC	523.364	C26 H54 O7 N1 P1	7.305	+H	173400000	171100000	0.987		7.83872	8.38956	1.07027
LPC(18:0e)	LPC	509.385	C26 H56 O6 N1 P1	8.081	+H	1735000	1502000	0.866		0.0784324	0.0736477	0.938996
LPC(18:0p)	LPC	507.369	C26 H54 O6 N1 P1	6.121	+H	1350000	5705000	4.225		0.0610281	0.279734	4.58369
LPC(18:1)	LPC	521.348	C26 H52 O7 N1 P1	5.116	+H	83480000	107000000	1.281		3.7738	5.24654	1.39026
LPC(18:2)	LPC	519.332	C26 H50 O7 N1 P1	3.386	+H	32620000	4233000	0.13		1.47462	0.207557	0.140753
LPC(20:0)	LPC	551.395	C28 H58 O7 N1 P1	9.362	+H	4153000	2171000	0.523		0.18774	0.106451	0.567011
LPC(20:0e)	LPC	537.416	C28 H60 O6 N1 P1	10.242	+H	2946000	1902000	0.645		0.133177	0.093261	0.700279
LPC(20:1)	LPC	549.379	C28 H56 O7 N1 P1	7.681	+H	4193000	4689000	1.118		0.189549	0.229916	1.21297
LPC(20:2)	LPC	547.364	C28 H54 O7 N1 P1	6.033	+H	975300	929700	0.953		0.0440894	0.0455861	1.03395
LPC(20:3)	LPC	545.348	C28 H52 O7 N1 P1	7.348	+H	19120000	19180000	1.003		0.864338	0.940455	1.08806
LPC(20:4)	LPC	543.332	C28 H50 O7 N1 P1	5.231	+H	6952000	9071000	1.305		0.314272	0.444779	1.41527
LPC(20:5)	LPC	541.317	C28 H48 O7 N1 P1	2.445	+H	2428000	887200	0.365		0.10976	0.0435022	0.396339
LPC(22:0)	LPC	579.426	C30 H62 O7 N1 P1	11.535	+H	1657000	1285000	0.775		0.0749063	0.0630075	0.841151
LPC(22:1)	LPC	577.411	C30 H60 O7 N1 P1	9.543	+H	862500	1043000	1.209		0.0389902	0.0511415	1.31165
LPC(22:5)	LPC	569.348	C30 H52 O7 N1 P1	3.946	+H	4486000	2256000	0.503		0.202794	0.110619	0.545473
LPC(22:6)	LPC	567.332	C30 H50 O7 N1 P1	3.329	+H	7379000	3376000	0.457		0.333575	0.165536	0.496248
LPE(16:0)	LPE	453.286	C21 H44 O7 N1 P1	4.373	+H	1537000	921000	0.599		3.65876	2.26496	0.61905
LPE(18:0)	LPE	481.317	C23 H48 O7 N1 P1	7.401	+H	4426000	4117000	0.93		10.5359	10.1247	0.960969
LPE(18:1)	LPE	479.301	C23 H46 O7 N1 P1	5.166	+H	1071000	1271000	1.186		2.54947	3.12569	1.22602
LPE(18:2)	LPE	477.286	C23 H44 O7 N1 P1	3.387	+H	1285000	151800	0.118		3.05889	0.373312	0.122042
LPE(20:4)	LPE	501.286	C25 H44 O7 N1 P1	3.396	+H	704800	258200	0.366		1.67775	0.634975	0.378469
PC(28:0)	PC	677.5	C36 H72 O8 N1 P1	14.546	+H	30840000	87540000	2.838		0.339374	0.816359	2.40548
PC(30:0)	PC	705.531	C38 H76 O8 N1 P1	16.636	+H	859500000	1865000000	2.17		9.45825	17.3922	1.83884
PC(30:0e)	PC	691.552	C38 H78 O7 N1 P1	17.836	+H	31940000	50960000	1.595		0.351479	0.47523	1.35209
PC(30:1)	PC	703.515	C38 H74 O8 N1 P1	14.839	+H	53030000	174400000	3.288		0.583561	1.62638	2.78699
PC(30:1e)	PC	689.536	C38 H76 O7 N1 P1	17.537	+H	7825000	18790000	2.402		0.0861091	0.175227	2.03494
PC(30:1e)	PC	689.536	C38 H76 O7 N1 P1	16.078	+H	27990000	31290000	1.118		0.308012	0.291797	0.947354
PC(30:2)	PC	701.5	C38 H72 O8 N1 P1	13.16	+H	725200	2693000	3.713		0.00798036	0.0251137	3.14694
PC(30:2)	PC	701.5	C38 H72 O8 N1 P1	14.238	+H	717700	4736000	6.599		0.00789783	0.0441658	5.59215
PC(30:2e)	PC	687.52	C38 H74 O7 N1 P1	14.391	+H	10050000	1929000	0.192		0.110594	0.017989	0.162658
PC(30:3)	PC	699.484	C38 H70 O8 N1 P1	14.564	+H	2955000	9059000	3.065		0.0325179	0.0844802	2.59796
PC(32:0)	PC	733.562	C40 H80 O8 N1 P1	18.607	+H	61840000	2426000000	39.22		0.680509	22.6238	33.2454
PC(32:0e)	PC	719.583	C40 H82 O7 N1 P1	19.783	+H	59840000	108200000	1.809		0.658501	1.00902	1.53231
PC(32:1)	PC	731.547	C40 H78 O8 N1 P1	16.908	+H	2612000000	4408000000	1.688		28.7434	41.107	1.43014
PC(32:1e)	PC	717.567	C40 H80 O7 N1 P1	18.042	+H	42700000	140900000	3.299		0.469886	1.31397	2.79636
PC(32:1p)	PC	715.552	C40 H78 O7 N1 P1	17.794	+H	13290000	38790000	2.919		0.146248	0.361738	2.47346
PC(32:2)	PC	729.531	C40 H76 O8 N1 P1	15.222	+H	209800000	126500000	0.603		2.30871	1.17968	0.510969
PC(32:2p)	PC	713.536	C40 H76 O7 N1 P1	14.983	+H	3023000	4889000	1.618		0.0332662	0.0455926	1.37054
PC(32:3)	PC	727.515	C40 H74 O8 N1 P1	16.636	+H	141300000	325600000	2.304		1.55492	3.0364	1.95277
PC(32:4)	PC	725.5	C40 H72 O8 N1 P1	14.836	+H	5335000	17080000	3.201		0.0587082	0.15928	2.71308
PC(32:4e)	PC	711.52	C40 H74 O7 N1 P1	14.092	+H	16440000	8760000	0.533		0.180912	0.0816918	0.451557
PC(32:4p)	PC	709.505	C40 H72 O7 N1 P1	12.739	+H	2005000	662400	0.33		0.0220637	0.00617725	0.279973
PC(34:0)	PC	761.593	C42 H84 O8 N1 P1	20.48	+H	107200000	304200000	2.838		1.17967	2.83683	2.40477
PC(34:0e)	PC	747.614	C42 H86 O7 N1 P1	21.573	+H	4816000	8292000	1.722		0.052997	0.0773275	1.45909
PC(34:1)	PC	759.578	C42 H82 O8 N1 P1	18.834	+H	16010000000	17570000000	1.097		176.18	163.85	0.930016
PC(34:1e)	PC	745.598	C42 H84 O7 N1 P1	19.907	+H	281400000	520900000	1.851		3.09663	4.85768	1.5687
PC(34:2)	PC	757.562	C42 H80 O8 N1 P1	17.302	+H	9849000000	2592000000	0.263		108.382	24.1718	0.223025
PC(34:2e)	PC	743.583	C42 H82 O7 N1 P1	19.684	+H	52580000	91610000	1.742		0.578609	0.854314	1.4765
PC(34:2p)	PC	741.567	C42 H80 O7 N1 P1	18.194	+H	36430000	20430000	0.561		0.400889	0.190521	0.475247
PC(34:3)	PC	755.547	C42 H78 O8 N1 P1	15.589	+H	559700000	160200000	0.286		6.15914	1.49395	0.242559
PC(34:4)	PC	753.531	C42 H76 O8 N1 P1	17.224	+H	162600000	298900000	1.838		1.78931	2.78741	1.55781
PC(34:5)	PC	751.515	C42 H74 O8 N1 P1	15.132	+H	3524000	13220000	3.75		0.0387794	0.123284	3.17911
PC(34:6e)	PC	735.52	C42 H74 O7 N1 P1	13.576	+H	5287000	2046000	0.387		0.05818	0.0190801	0.327949
PC(36:1)	PC	787.609	C44 H86 O8 N1 P1	20.659	+H	1141000000	1744000000	1.528		12.556	16.2638	1.2953
PC(36:1e)	PC	773.63	C44 H88 O7 N1 P1	21.725	+H	13750000	14100000	1.025		0.15131	0.13149	0.869013
PC(36:2)	PC	785.593	C44 H84 O8 N1 P1	19.014	+H	2657000000	6086000000	2.29		29.2386	56.7553	1.94111
PC(36:2e)	PC	771.614	C44 H86 O7 N1 P1	20.095	+H	21270000	69410000	3.264		0.234063	0.647287	2.76544
PC(36:2p)	PC	769.598	C44 H84 O7 N1 P1	18.772	+H	29110000	40470000	1.39		0.320337	0.377405	1.17815
PC(36:3)	PC	783.578	C44 H82 O8 N1 P1	17.6	+H	1744000000	636500000	0.365		19.1916	5.93571	0.309287
PC(36:4)	PC	781.562	C44 H80 O8 N1 P1	18.816	+H	1286000000	1283000000	0.998		14.1516	11.9647	0.845465
PC(36:4e)	PC	767.583	C44 H82 O7 N1 P1	19.684	+H	28460000	63600000	2.235		0.313184	0.593105	1.89379
PC(36:4p)	PC	765.567	C44 H80 O7 N1 P1	17.787	+H	142200000	292200000	2.054		1.56482	2.72493	1.74137
PC(36:5)	PC	779.547	C44 H78 O8 N1 P1	17.317	+H	852300000	356900000	0.419		9.37901	3.32829	0.354866
PC(36:5p)	PC	763.552	C44 H78 O7 N1 P1	16.539	+H	20290000	20890000	1.029		0.223278	0.194811	0.872502
PC(36:6)	PC	777.531	C44 H76 O8 N1 P1	13.979	+H	6385000	5454000	0.854		0.0702628	0.0508616	0.723876
PC(38:1)	PC	815.64	C46 H90 O8 N1 P1	22.16	+H	30860000	37290000	1.208		0.339594	0.34775	1.02401
PC(38:2)	PC	813.625	C46 H88 O8 N1 P1	20.684	+H	139400000	143700000	1.031		1.53401	1.34008	0.873582
PC(38:2e)	PC	799.645	C46 H90 O7 N1 P1	22.079	+H	3472000	5687000	1.638		0.0382071	0.0530344	1.38808
PC(38:3)	PC	811.609	C46 H86 O8 N1 P1	19.635	+H	186200000	215300000	1.156		2.04901	2.00779	0.979883
PC(38:4)	PC	809.593	C46 H84 O8 N1 P1	18.24	+H	126400000	107300000	0.849		1.39095	1.00063	0.719387
PC(38:4e)	PC	795.614	C46 H86 O7 N1 P1	19.303	+H	12610000	34980000	2.774		0.138765	0.326208	2.35079
PC(38:4p)	PC	793.598	C46 H84 O7 N1 P1	18.384	+H	97670000	236400000	2.42		1.0748	2.20456	2.05114
PC(38:5)	PC	807.578	C46 H82 O8 N1 P1	19.02	+H	379700000	671200000	1.768		4.17835	6.25931	1.49803
PC(38:6)	PC	805.562	C46 H80 O8 N1 P1	17.602	+H	326700000	112600000	0.345		3.59512	1.05006	0.292078
PC(38:6e)	PC	791.583	C46 H82 O7 N1 P1	17.564	+H	44250000	39270000	0.887		0.486943	0.366214	0.752069
PC(38:6p)	PC	789.567	C46 H80 O7 N1 P1	17.318	+H	57060000	85100000	1.491		0.627909	0.793604	1.26389
PC(38:7)	PC	803.547	C46 H78 O8 N1 P1	14.801	+H	16810000	38420000	2.286		0.184983	0.358288	1.93687
PC(38:8)	PC	801.531	C46 H76 O8 N1 P1	15.303	+H	4468000	7416000	1.66		0.0491675	0.0691583	1.40659
PC(40:1)	PC	843.672	C48 H94 O8 N1 P1	23.581	+H	3132000	5467000	1.745		0.0344656	0.0509828	1.47923
PC(40:10)	PC	825.531	C48 H76 O8 N1 P1	14.805	+H	1097000	1967000	1.793		0.0120718	0.0183434	1.51952
PC(40:2)	PC	841.656	C48 H92 O8 N1 P1	22.273	+H	9529000	22940000	2.408		0.104861	0.213928	2.04012
PC(40:3)	PC	839.64	C48 H90 O8 N1 P1	21.093	+H	12860000	30990000	2.41		0.141516	0.288999	2.04216
PC(40:3p)	PC	823.645	C48 H90 O7 N1 P1	21.475	+H	3123000	5333000	1.708		0.0343666	0.0497332	1.44714
PC(40:4)	PC	837.625	C48 H88 O8 N1 P1	19.906	+H	32800000	40660000	1.24		0.360943	0.379177	1.05052
PC(40:5)	PC	835.609	C48 H86 O8 N1 P1	18.998	+H	193100000	270100000	1.399		2.12494	2.51883	1.18537
PC(40:5e)	PC	821.63	C48 H88 O7 N1 P1	21.492	+H	1670000	1197000	0.717		0.0183773	0.0111627	0.607418
PC(40:6)	PC	833.593	C48 H84 O8 N1 P1	18.504	+H	216800000	289100000	1.333		2.38574	2.69602	1.13005
PC(40:6e)	PC	819.614	C48 H86 O7 N1 P1	18.422	+H	16370000	55490000	3.39		0.180141	0.517475	2.8726
PC(40:6p)	PC	817.598	C48 H84 O7 N1 P1	19.245	+H	8493000	9010000	1.061		0.09346	0.0840232	0.899029
PC(40:7)	PC	831.578	C48 H82 O8 N1 P1	19.264	+H	132800000	108900000	0.82		1.46138	1.01555	0.694928
PC(40:7p)	PC	815.583	C48 H82 O7 N1 P1	17.502	+H	11440000	17810000	1.556		0.12589	0.166088	1.31931
PC(40:8)	PC	829.562	C48 H80 O8 N1 P1	15.248	+H	9229000	7387000	0.8		0.101559	0.0688879	0.678302
PC(40:9)	PC	827.547	C48 H78 O8 N1 P1	16.55	+H	148000000	101700000	0.687		1.62864	0.948409	0.58233
PC(42:1)	PC	871.703	C50 H98 O8 N1 P1	25.036	+H	1098000	1835000	1.671		0.0120828	0.0171124	1.41626
PC(42:10)	PC	853.562	C50 H80 O8 N1 P1	14.833	+H	1909000	2035000	1.066		0.0210073	0.0189775	0.903376
PC(42:2)	PC	869.687	C50 H96 O8 N1 P1	23.672	+H	2024000	7865000	3.885		0.0222728	0.0733455	3.29305
PC(42:3)	PC	867.672	C50 H94 O8 N1 P1	22.45	+H	2381000	7899000	3.318		0.0262014	0.0736625	2.8114
PC(42:3p)	PC	851.677	C50 H94 O7 N1 P1	23.331	+H	1197000	891700	0.745		0.0131722	0.00831559	0.631298
PC(42:4)	PC	865.656	C50 H92 O8 N1 P1	21.336	+H	2765000	5078000	1.837		0.030427	0.0473552	1.55635
PC(42:4p)	PC	849.661	C50 H92 O7 N1 P1	21.839	+H	2955000	1338000	0.453		0.0325179	0.0124776	0.383715
PC(42:5)	PC	863.64	C50 H90 O8 N1 P1	20.757	+H	5131000	7999000	1.559		0.0564634	0.0745951	1.32112
PC(42:6)	PC	861.625	C50 H88 O8 N1 P1	19.098	+H	8697000	14010000	1.611		0.0957049	0.130651	1.36514
PC(42:6e)	PC	847.645	C50 H90 O7 N1 P1	21.32	+H	2424000	1031000	0.425		0.0266746	0.00961464	0.360442
PC(42:7)	PC	859.609	C50 H86 O8 N1 P1	18.549	+H	11350000	13820000	1.217		0.124899	0.128879	1.03186
PC(44:5)	PC	891.672	C52 H94 O8 N1 P1	22.307	+H	1290000	2372000	1.839		0.0141956	0.0221202	1.55824
PE(32:1)	PE	689.5	C37 H72 O8 N1 P1	17.375	+H	19460000	16950000	0.871		61.6547	39.3223	0.637783
PE(32:4p)	PE	667.458	C37 H66 O7 N1 P1	14.282	+H	2717000	3634000	1.338		8.60821	8.43052	0.979358
PE(34:1)	PE	717.531	C39 H76 O8 N1 P1	19.298	+H	154100000	137400000	0.892		488.231	318.754	0.652875
PE(34:1p)	PE	701.536	C39 H76 O7 N1 P1	20.185	+H	40030000	72900000	1.821		126.826	169.121	1.33349
PE(34:2)	PE	715.515	C39 H74 O8 N1 P1	17.657	+H	14080000	26310000	1.869		44.6093	61.0366	1.36825
PE(34:2e)	PE	701.536	C39 H76 O7 N1 P1	20.184	+H	14800000	25180000	1.702		46.8905	58.4151	1.24578
PE(34:2p)	PE	699.52	C39 H74 O7 N1 P1	18.734	+H	22140000	25030000	1.131		70.1456	58.0671	0.827808
PE(34:3)	PE	713.5	C39 H72 O8 N1 P1	16.081	+H	22250000	8496000	0.382		70.4941	19.7099	0.279596
PE(36:0)	PE	747.578	C41 H82 O8 N1 P1	20.722	+H	11530000	49710000	4.312		36.5302	115.322	3.1569
PE(36:1)	PE	745.562	C41 H80 O8 N1 P1	21.073	+H	59630000	79460000	1.333		188.924	184.339	0.975731
PE(36:1p)	PE	729.567	C41 H80 O7 N1 P1	21.89	+H	10590000	13550000	1.28		33.552	31.4346	0.936892
PE(36:2)	PE	743.547	C41 H78 O8 N1 P1	17.622	+H	128200000	140300000	1.095		406.173	325.482	0.801338
PE(36:2p)	PE	727.552	C41 H78 O7 N1 P1	20.321	+H	11460000	35430000	3.091		36.3084	82.1941	2.26377
PE(36:3)	PE	741.531	C41 H76 O8 N1 P1	18.009	+H	12350000	3908000	0.317		39.1282	9.06617	0.231704
PE(36:4)	PE	739.515	C41 H74 O8 N1 P1	17.512	+H	167000000	74000000	0.443		529.102	171.673	0.32446
PE(36:5)	PE	737.5	C41 H72 O8 N1 P1	16.171	+H	206000000	55570000	0.27		652.665	128.917	0.197524
PE(36:5p)	PE	721.505	C41 H72 O7 N1 P1	17.067	+H	55880000	32910000	0.589		177.043	76.3479	0.431239
PE(38:2)	PE	771.578	C43 H82 O8 N1 P1	20.138	+H	4491000	3545000	0.789		14.2287	8.22405	0.577989
PE(38:3)	PE	769.562	C43 H80 O8 N1 P1	20.566	+H	11240000	50280000	4.474		35.6114	116.645	3.27548
PE(38:4)	PE	767.547	C43 H78 O8 N1 P1	19.404	+H	287500000	219400000	0.763		910.879	508.986	0.558785
PE(38:5)	PE	765.531	C43 H76 O8 N1 P1	17.662	+H	128200000	133100000	1.038		406.173	308.779	0.760215
PE(38:5p)	PE	749.536	C43 H76 O7 N1 P1	18.484	+H	164900000	353200000	2.142		522.449	819.389	1.56836
PE(38:6)	PE	763.515	C43 H74 O8 N1 P1	16.974	+H	197000000	104700000	0.532		624.15	242.894	0.389159
PE(38:6e)	PE	749.536	C43 H76 O7 N1 P1	18.507	+H	65930000	90410000	1.371		208.884	209.742	1.00411
PE(40:4)	PE	795.578	C45 H82 O8 N1 P1	20.68	+H	27000000	19060000	0.706		85.5435	44.2173	0.516899
PE(40:4p)	PE	779.583	C45 H82 O7 N1 P1	21.423	+H	4810000	4323000	0.899		15.2394	10.0289	0.658092
PE(40:5)	PE	793.562	C45 H80 O8 N1 P1	19.507	+H	76950000	61910000	0.805		243.799	143.625	0.589113
PE(40:5p)	PE	777.567	C45 H80 O7 N1 P1	20.314	+H	19300000	19350000	1.003		61.1477	44.8901	0.734125
PE(40:6)	PE	791.547	C45 H78 O8 N1 P1	18.923	+H	185800000	134400000	0.724		588.666	311.795	0.529663
PE(40:6e)	PE	777.567	C45 H80 O7 N1 P1	20.307	+H	7963000	5735000	0.72		25.229	13.3046	0.527355
PE(40:6p)	PE	775.552	C45 H78 O7 N1 P1	18.637	+H	28310000	80040000	2.827		89.6939	185.685	2.07021
PE(40:7)	PE	789.531	C45 H76 O8 N1 P1	17.202	+H	60730000	71140000	1.171		192.409	165.038	0.857742
PE(40:7p)	PE	773.536	C45 H76 O7 N1 P1	18.029	+H	46420000	105300000	2.269		147.071	244.285	1.661
SM(d32:0)	SM	676.552	C37 H77 O6 N2 P1	15.016	+H	2285000	1490000	0.652		0.314394	0.152469	0.484962
SM(d32:1)	SM	674.536	C37 H75 O6 N2 P1	14.21	+H	68740000	70650000	1.028		9.45797	7.2295	0.764382
SM(d32:2)	SM	672.521	C37 H73 O6 N2 P1	12.355	+H	985700	1370000	1.39		0.135623	0.14019	1.03367
SM(d34:0)	SM	704.583	C39 H81 O6 N2 P1	17.199	+H	278200000	140200000	0.504		38.2777	14.3464	0.374799
SM(d34:1)	SM	702.568	C39 H79 O6 N2 P1	16.406	+H	4285000000	4300000000	1.004		589.575	440.012	0.74632
SM(d34:2)	SM	700.552	C39 H77 O6 N2 P1	14.579	+H	214600000	188100000	0.876		29.5269	19.248	0.651879
SM(d34:4)	SM	696.521	C39 H73 O6 N2 P1	14.209	+H	10610000	11740000	1.107		1.45984	1.20134	0.822925
SM(d36:0)	SM	732.615	C41 H85 O6 N2 P1	19.255	+H	6816000	2713000	0.398		0.937817	0.277617	0.296025
SM(d36:1)	SM	730.599	C41 H83 O6 N2 P1	18.521	+H	120600000	91310000	0.757		16.5934	9.34361	0.563091
SM(d36:2)	SM	728.583	C41 H81 O6 N2 P1	16.771	+H	29650000	19140000	0.646		4.07956	1.95857	0.480093
SM(d36:3)	SM	726.568	C41 H79 O6 N2 P1	17.193	+H	57670000	30930000	0.536		7.93484	3.16502	0.398876
SM(d36:4)	SM	724.552	C41 H77 O6 N2 P1	16.41	+H	823600000	840000000	1.02		113.32	85.9559	0.758526
SM(d36:5)	SM	722.536	C41 H75 O6 N2 P1	14.574	+H	43300000	39260000	0.907		5.95767	4.01741	0.674326
SM(d38:1)	SM	758.63	C43 H87 O6 N2 P1	20.46	+H	23770000	15810000	0.665		3.27053	1.61781	0.494664
SM(d38:4)	SM	752.583	C43 H81 O6 N2 P1	18.504	+H	32390000	17790000	0.549		4.45656	1.82042	0.408482
SM(d38:5)	SM	750.568	C43 H79 O6 N2 P1	16.767	+H	6332000	4386000	0.693		0.871223	0.448812	0.515152
SM(d40:1)	SM	786.662	C45 H91 O6 N2 P1	22.177	+H	32580000	38760000	1.19		4.4827	3.96625	0.88479
SM(d40:2)	SM	784.646	C45 H89 O6 N2 P1	20.429	+H	14270000	11760000	0.824		1.96342	1.20338	0.612902
SM(d40:4)	SM	780.615	C45 H85 O6 N2 P1	20.472	+H	4628000	3407000	0.736		0.636769	0.348633	0.547503
SM(d42:1)	SM	814.693	C47 H95 O6 N2 P1	22.676	+H	7383000	4408000	0.597		1.01583	0.451064	0.444034
SM(d42:2)	SM	812.677	C47 H93 O6 N2 P1	22.089	+H	182200000	263000000	1.444		25.069	26.9124	1.07353
SM(d42:3)	SM	810.662	C47 H91 O6 N2 P1	20.655	+H	133800000	151300000	1.131		18.4096	15.4823	0.840989
SM(d42:4)	SM	808.646	C47 H89 O6 N2 P1	22.182	+H	7608000	8884000	1.168		1.04679	0.909086	0.868452
SM(d44:6)	SM	832.646	C49 H89 O6 N2 P1	20.652	+H	34910000	36830000	1.055		4.80328	3.76876	0.78462
TG(46:0)	TG	778.705	C49 H94 O6	28.623	+NH4	22950000	4346000	0.189		15.5793	3.63492	0.233318
TG(46:1)	TG	776.689	C49 H92 O6	27.967	+NH4	15600000	5841000	0.374		10.5898	4.88532	0.461322
TG(48:0)	TG	806.736	C51 H98 O6	29.191	+NH4	130800000	11430000	0.087		88.7917	9.55987	0.107666
TG(48:1)	TG	804.721	C51 H96 O6	28.627	+NH4	101100000	11720000	0.116		68.6303	9.80242	0.142829
TG(48:2)	TG	802.705	C51 H94 O6	28.065	+NH4	25540000	6227000	0.244		17.3375	5.20816	0.300399
TG(50:0)	TG	834.768	C53 H102 O6	29.682	+NH4	54030000	9212000	0.171		36.6775	7.70477	0.210068
TG(50:1)	TG	832.752	C53 H100 O6	29.191	+NH4	380700000	19170000	0.05		258.433	16.0335	0.0620412
TG(50:2)	TG	830.736	C53 H98 O6	28.702	+NH4	170800000	17150000	0.1		115.945	14.344	0.123714
TG(52:0)	TG	862.799	C55 H106 O6	30.1	+NH4	19710000	4193000	0.213		13.3798	3.50696	0.262107
TG(52:2)	TG	858.768	C55 H102 O6	29.192	+NH4	361700000	29560000	0.082		245.535	24.7235	0.100692
TG(52:3)	TG	856.752	C55 H100 O6	28.712	+NH4	138300000	11420000	0.083		93.8829	9.5515	0.101738
TG(54:2)	TG	886.799	C57 H106 O6	29.68	+NH4	106700000	11940000	0.112		72.4317	9.98642	0.137874
TG(54:3)	TG	884.783	C57 H104 O6	29.202	+NH4	136800000	21120000	0.154		92.8647	17.6644	0.190217
TG(56:4)	TG	910.799	C59 H106 O6	29.6	+NH4	9143000	1916000	0.21		6.20659	1.60251	0.258195
TG(56:5)	TG	908.783	C59 H104 O6	28.945	+NH4	18920000	2461000	0.13		12.8436	2.05834	0.160262
compound						D3	D7
PC IS						90873090	107232260
DG IS						230987	427874
PE IS						315629	431053
TG IS						1473111	1.19562e+06
SM IS						7267943	9772458
LPC IS						22120965	20394385
LPE IS						420087	406630

## Sheet: Primary PSC CM
Lipids identified in the conditioned media of primary PSCs
Filters used							LipidMolec	Class	FA	FA Group Key	Counts	Calc Mass	Formula	BaseRt	MainIon	ARatio[s1/c]	HRatio[s1/c]	APValue[s1]	MainGrade[s1]	MainArea[c]	MainArea[s1]	MainHeight[c]	MainHeight[s1]
Area ratio ≥ 10-fold fresh medium controls							Cer(d18:1/16:0)	Cer	d18:1/16:0	d34:1	1	537.512	C34 H67 O3 N1	18.434	+H	17.539	14.516	0.006	B	238000	4175000	42680	619500
Retention time ≥ 2 min							Cer(d18:1/22:0)	Cer	d18:1/22:0	d40:1	1	621.606	C40 H79 O3 N1	25.421	+H	78.839	45.957	0	B	76980	6069000	29030	1334000
							Cer(d18:1/24:1)	Cer	d18:1/24:1	d42:2	1	647.622	C42 H81 O3 N1	23.523	+H	1.39225e+06	235214	0	B	0	1392000	0	235200
							CerP(d23:0)	CerP	d23:0	d23:0	1	465.322	C23 H48 O6 N1 P1	16.641	-H	1.50326e+06	363362	0	D	0	1503000	0	363400
MainGrade (level of lipid identification)							CerP(d36:1)	CerP	d36:1	d36:1	1	645.51	C36 H72 O6 N1 P1	23.467	-H	20.675	16.599	0	C	671300	13880000	275200	4568000
A	Lipid class and FA were completely identified						CerP(d38:1)	CerP	d38:1	d38:1	1	673.541	C38 H76 O6 N1 P1	24.094	-H	8.57033e+06	2.43212e+06	0	C	0	8570000	0	2432000
B	Lipid class and some FA were identified						CerP(d40:1)	CerP	d40:1	d40:1	1	701.572	C40 H80 O6 N1 P1	24.874	-H	32.831	27.25	0	C	678900	22290000	169100	4607000
C	Lipid class or FA were identified						CerP(d42:1)	CerP	d42:1	d42:1	1	729.604	C42 H84 O6 N1 P1	25.859	-H	107.617	75.348	0	C	138000	14850000	40700	3067000
D	Lipid ID by other fragment ions (H2O loss etc.)						CerP(d42:2)	CerP	d42:2	d42:2	1	727.588	C42 H82 O6 N1 P1	24.943	-H	127.132	96.078	0	C	263700	33530000	71490	6869000
							CerP(d42:3)	CerP	d42:3	d42:3	1	725.572	C42 H80 O6 N1 P1	24.312	-H	171.783	91.568	0	C	73670	12650000	33660	3082000
							ChE(14:0)	ChE	14:0	14:0	1	596.553	C41 H72 O2	28.498	+NH4	1.75613e+06	398484	0	B	0	1756000	0	398500
FA = fatty acid							ChE(16:0)	ChE	16:0	16:0	1	624.585	C43 H76 O2	29.245	+NH4	38268.5	5561.88	0	B	640.1	24500000	846.7	4709000
							ChE(16:1)	ChE	16:1	16:1	1	622.569	C43 H74 O2	28.492	+NH4	1024.55	839.688	0.016	B	40640	41640000	10700	8989000
							ChE(17:0)	ChE	17:0	17:0	1	638.6	C44 H78 O2	29.441	+NH4	949400	217373	0	B	0	949400	0	217400
							ChE(17:1)	ChE	17:1	17:1	1	636.585	C44 H76 O2	28.871	+NH4	1.44685e+07	3.41913e+06	0	B	0	14470000	0	3419000
							ChE(18:0)	ChE	18:0	18:0	1	652.616	C45 H80 O2	29.845	+NH4	3.03267e+06	890661	0	B	0	3033000	0	890700
							ChE(18:1)	ChE	18:1	18:1	1	650.6	C45 H78 O2	29.213	+NH4	646.887	512.769	0.001	B	262400	169700000	69280	35530000
							ChE(18:2)	ChE	18:2	18:2	1	648.585	C45 H76 O2	28.575	+NH4	52.387	46.233	0.002	B	3548000	185900000	766300	35430000
							ChE(18:3)	ChE	18:3	18:3	1	646.569	C45 H74 O2	27.926	+NH4	197.866	183.063	0.003	B	171200	33870000	31760	5814000
							ChE(19:2)	ChE	19:2	19:2	1	662.6	C46 H78 O2	28.924	+NH4	31.96	16.139	0.005	B	81400	2602000	27280	440300
							ChE(19:3)	ChE	19:3	19:3	1	660.585	C46 H76 O2	28.444	+NH4	234.551	113.131	0.003	B	9835	2307000	3954	447300
							ChE(20:1)	ChE	20:1	20:1	1	678.631	C47 H82 O2	29.804	+NH4	205.203	41.876	0.004	B	10750	2206000	11720	491000
							ChE(20:2)	ChE	20:2	20:2	1	676.616	C47 H80 O2	29.27	+NH4	83.314	91.002	0	B	55880	4656000	11060	1007000
							ChE(20:3)	ChE	20:3	20:3	1	674.6	C47 H78 O2	28.677	+NH4	227.782	249.269	0.002	B	247100	56290000	49840	12420000
							ChE(20:4)	ChE	20:4	20:4	2	672.585	C47 H76 O2	28.166	+NH4	624.046	542.298	0.001	B	412000	257100000	82970	45000000
							ChE(20:5)	ChE	20:5	20:5	1	670.569	C47 H74 O2	27.486	+NH4	9231.86	2966.49	0.005	B	10030	92580000	5813	17240000
							ChE(22:3)	ChE	22:3	22:3	1	702.631	C49 H82 O2	29.339	+NH4	274.769	55.32	0.02	B	4018	1104000	4031	223000
							ChE(22:4)	ChE	22:4	22:4	1	700.616	C49 H80 O2	28.781	+NH4	1006.94	215.604	0.023	B	4155	4184000	4043	871600
							ChE(22:5)	ChE	22:5	22:5	1	698.6	C49 H78 O2	28.203	+NH4	4637.04	1844.41	0	B	6075	28170000	3337	6155000
							ChE(22:6)	ChE	22:6	22:6	1	696.585	C49 H76 O2	27.773	+NH4	16462.6	7914.06	0	B	8844	145600000	3774	29870000
							ChE(24:5)	ChE	24:5	24:5	1	726.631	C51 H82 O2	28.904	+NH4	1659.95	482.746	0	B	1833	3043000	1453	701300
							cPA(16:0)	cPA	16:0	16:0	1	392.233	C19 H37 O6 N0 P1	14.602	-H	26.481	26.251	0	B	301900	7994000	97650	2563000
							cPA(18:1)	cPA	18:1	18:1	1	418.248	C21 H39 O6 N0 P1	15.081	-H	25.184	21.397	0	B	154400	3889000	42880	917600
							cPA(20:4)	cPA	20:4	20:4	1	440.233	C23 H37 O6 N0 P1	13.904	-H	934096	263071	0	B	0	934100	0	263100
							cPA(22:5)	cPA	22:5	22:5	1	466.248	C25 H39 O6 N0 P1	14.569	-H	2.34768e+06	747590	0	B	0	2348000	0	747600
							cPA(22:6)	cPA	22:6	22:6	1	464.233	C25 H37 O6 N0 P1	13.959	-H	1.81829e+06	575939	0	B	0	1818000	0	575900
							DG(16:0/22:5)	DG	16:0/22:5	38:5	1	642.522	C41 H70 O5	24.186	+NH4	1.96701e+07	4.0475e+06	0	B	0	19670000	0	4047000
							DG(18:0/22:5)	DG	18:0/22:5	40:5	1	670.554	C43 H74 O5	24.997	+NH4	260.678	87.981	0.005	B	42570	11100000	18120	1594000
							dMePE(34:4p)	dMePE	34:4p	34:4p	1	723.52	C41 H74 O7 N1 P1	21.525	-H	4891.32	2727.7	0	C	1793	8769000	1381	3766000
							FA(16:0)	FA	16:0	16:0	Manually confirmed
							FA(16:1)	FA	16:1	16:1	Manually confirmed
							FA(18:0)	FA	18:0	18:0	Manually confirmed
							FA(18:1)	FA	18:1	18:1	Manually confirmed
							FA(18:2)	FA	18:2	18:2	Manually confirmed
							FA(20:4)	FA	20:4	20:4	1	304.24	O2 H32 C20	13.064	-H	94.473	82.779	0	C	4937000	466500000	1416000	117200000
							FA(22:5)	FA	22:5	22:5	1	330.256	O2 H34 C22	13.849	-H	549.239	538.273	0	D	581300	319300000	191700	103200000
							LdMePE(16:0)	LdMePE	16:0	16:0	1	481.317	C23 H48 O7 N1 P1	4.032	-H	91.671	55.079	0	B	15260	1399000	2808	154700
							LdMePE(18:0)	LdMePE	18:0	18:0	1	509.348	C25 H52 O7 N1 P1	6.963	-H	18.292	19.014	0	B	78490	1436000	11440	217500
							LdMePE(21:4)	LdMePE	21:4	21:4	1	543.332	C28 H50 O7 N1 P1	18.382	-H	57.49	38.714	0	B	54850	3153000	21650	838000
							LPA(16:0)	LPA	16:0	16:0	1	410.243	C19 H39 O7 N0 P1	9.08	-H	13.892	10.209	0	A	476800	6624000	100800	1029000
							LPA(16:0)	LPA	16:0	16:0	1	410.243	C19 H39 O7 N0 P1	8.414	-H	21.821	13.3	0	A	38450	839000	7033	93540
							LPA(16:1)	LPA	16:1	16:1	1	408.228	C19 H37 O7 N0 P1	5.845	-H	74.39	50.823	0	A	13060	971200	3429	174300
							LPA(18:1)	LPA	18:1	18:1	1	436.259	C21 H41 O7 N0 P1	10.213	-H	55.852	39.58	0	A	122500	6843000	22720	899300
							LPA(20:3)	LPA	20:3	20:3	1	460.259	C23 H41 O7 N0 P1	9.457	-H	256.185	51.052	0	A	3365	862100	2942	150200
							LPA(20:4)	LPA	20:4	20:4	1	458.243	C23 H39 O7 N0 P1	7.825	-H	5.34086e+06	894628	0	A	0	5341000	0	894600
							LPA(22:5)	LPA	22:5	22:5	1	484.259	C25 H41 O7 N0 P1	9.276	-H	2.26489e+06	400006	0	A	0	2265000	0	400000
							LPA(22:6)	LPA	22:6	22:6	1	482.243	C25 H39 O7 N0 P1	8.051	-H	1744.54	166.198	0	A	1334	2328000	2118	352000
							LPC(12:0e)	LPC	12:0e	12:0e	1	425.291	C20 H44 O6 N1 P1	15.643	+H	1.5535e+07	3.53727e+06	0	B	0	15530000	0	3537000
							LPC(12:0p)	LPC	12:0p	12:0p	1	423.275	C20 H42 O6 N1 P1	15.434	+H	2.10797e+06	506088	0	B	0	2108000	0	506100
							LPC(14:0)	LPC	14:0	14:0	1	467.301	C22 H46 O7 N1 P1	2.187	+H	15.005	16.344	0.003	B	59340	890400	9643	157600
							LPC(14:0e)	LPC	14:0e	14:0e	1	453.322	C22 H48 O6 N1 P1	18.101	+H	32.332	27.815	0	B	255600	8265000	70320	1956000
							LPC(15:0)	LPC	15:0	15:0	1	481.317	C23 H48 O7 N1 P1	2.919	+H	16.683	15.37	0	B	73230	1222000	11950	183700
							LPC(16:0)	LPC	16:0	16:0	1	495.332	C24 H50 O7 N1 P1	4.048	+H	11.542	11.838	0	B	6108000	70500000	732300	8669000
							LPC(16:0)	LPC	16:0	16:0	1	495.332	C24 H50 O7 N1 P1	3.553	+H	11.392	13.881	0.056	B	1005000	11450000	86830	1205000
							LPC(16:0e)	LPC	16:0e	16:0e	1	481.353	C24 H52 O6 N1 P1	19.869	+H	14.897	16.062	0	B	5420000	80730000	1646000	26440000
							LPC(16:0p)	LPC	16:0p	16:0p	1	479.338	C24 H50 O6 N1 P1	19.68	+H	14.082	15.788	0	B	15540000	218800000	4137000	65310000
							LPC(16:1)	LPC	16:1	16:1	1	493.317	C24 H48 O7 N1 P1	2.581	+H	11.091	10.935	0.006	B	346100	3839000	23500	256900
							LPC(17:0)	LPC	17:0	17:0	1	509.348	C25 H52 O7 N1 P1	5.487	+HCOO	18.164	16.536	0	A	147100	2672000	18720	309600
							LPC(18:0)	LPC	18:0	18:0	1	523.364	C26 H54 O7 N1 P1	6.962	+HCOO	15.027	15.002	0	A	3650000	54850000	526100	7892000
							LPC(18:0)	LPC	18:0	18:0	1	523.364	C26 H54 O7 N1 P1	6.395	+HCOO	13.735	13.724	0	A	395700	5435000	52560	721300
							LPC(18:0p)	LPC	18:0p	18:0p	1	507.369	C26 H54 O6 N1 P1	5.613	+H	23.453	11.478	0.003	B	74250	1741000	8053	92440
							LPC(18:1)	LPC	18:1	18:1	1	521.348	C26 H52 O7 N1 P1	4.772	+H	11.096	6.655	0.001	B	2664000	29560000	236800	1576000
							LPC(18:1)	LPC	18:1	18:1	1	521.348	C26 H52 O7 N1 P1	4.26	+H	11.586	6.517	0.03	B	376700	4364000	36210	236000
							LPC(18:1p)	LPC	18:1p	18:1p	1	505.353	C26 H52 O6 N1 P1	20.015	+H	33.255	26.141	0	B	1254000	41690000	392700	10260000
							LPC(18:3)	LPC	18:3	18:3	1	517.317	C26 H48 O7 N1 P1	4.05	+H	16.09	15.609	0	B	181300	2917000	22000	343300
							LPC(19:0)	LPC	19:0	19:0	1	537.379	C27 H56 O7 N1 P1	8.065	+H	10.275	4.923	0.02	B	362400	3724000	43950	216400
							LPC(19:1)	LPC	19:1	19:1	1	535.364	C27 H54 O7 N1 P1	20.097	+H	26.499	22.511	0	B	799700	21190000	239400	5389000
							LPC(20:0)	LPC	20:0	20:0	1	551.395	C28 H58 O7 N1 P1	9.053	+HCOO	221.162	129.049	0	A	2848	629900	982.2	126700
							LPC(20:0e)	LPC	20:0e	20:0e	1	537.416	C28 H60 O6 N1 P1	9.725	+H	24.251	15.609	0	B	45910	1113000	6768	105600
							LPC(20:0p)	LPC	20:0p	20:0p	1	535.4	C28 H58 O6 N1 P1	21.592	+H	122.421	120.517	0	B	70880	8678000	28910	3485000
							LPC(20:1)	LPC	20:1	20:1	1	549.379	C28 H56 O7 N1 P1	7.364	+HCOO	122.669	83.6	0	A	9874	1211000	1977	165200
							LPC(20:2)	LPC	20:2	20:2	1	547.364	C28 H54 O7 N1 P1	19.916	+H	44.058	36.028	0	B	795500	35050000	123600	4453000
							LPC(20:3)	LPC	20:3	20:3	1	545.348	C28 H52 O7 N1 P1	19.391	+H	182.279	141.915	0	B	135700	24730000	39570	5615000
							LPC(20:3)	LPC	20:3	20:3	1	545.348	C28 H52 O7 N1 P1	19.084	+H	18.559	19.743	0	B	5202000	96540000	1248000	24640000
							LPC(20:3)	LPC	20:3	20:3	1	545.348	C28 H52 O7 N1 P1	18.768	+H	30.2	19.162	0	B	396700	11980000	57900	1110000
							LPC(20:4)	LPC	20:4	20:4	1	543.332	C28 H50 O7 N1 P1	3.18	+H	22.607	24.171	0	B	135600	3065000	19320	466900
							LPC(20:4)	LPC	20:4	20:4	1	543.332	C28 H50 O7 N1 P1	2.886	+H	12.589	8.599	0.002	B	56390	709900	10410	89500
							LPC(20:5)	LPC	20:5	20:5	1	541.317	C28 H48 O7 N1 P1	17.376	+H	56.757	33.092	0	B	261400	14840000	86360	2858000
							LPC(22:1)	LPC	22:1	22:1	1	577.411	C30 H60 O7 N1 P1	9.235	+H	34.643	36.302	0.004	B	20770	719700	3825	138800
							LPC(22:5)	LPC	22:5	22:5	1	569.348	C30 H52 O7 N1 P1	3.67	+H	73.319	51.035	0	B	23030	1688000	4647	237200
							LPC(22:6)	LPC	22:6	22:6	1	567.332	C30 H50 O7 N1 P1	3.097	+H	97.974	63.543	0	B	10490	1028000	2567	163100
							LPC(24:0)	LPC	24:0	24:0	1	607.458	C32 H66 O7 N1 P1	13.262	+H	45.249	16.404	0.004	B	39740	1798000	9497	155800
							LPC(24:1)	LPC	24:1	24:1	1	605.442	C32 H64 O7 N1 P1	11.036	+H	142.787	70.584	0.004	B	10260	1466000	2138	150900
							LPC(28:0)	LPC	28:0	28:0	1	663.52	C36 H74 O7 N1 P1	15.244	+H	1610.54	188.263	0.001	B	2867	4617000	2043	384700
							LPE(16:0)	LPE	16:0	16:0	1	453.286	C21 H44 O7 N1 P1	3.95	-H	82.434	62.037	0	B	15320	1263000	2375	147400
							LPE(16:0e)	LPE	16:0e	16:0e	1	439.306	C21 H46 O6 N1 P1	16.255	+H	46.178	28.962	0	B	63480	2931000	25720	744800
							LPE(16:0p)	LPE	16:0p	16:0p	1	437.291	C21 H44 O6 N1 P1	16.065	+Na	498.816	343.753	0	B	8976	4477000	3484	1198000
							LPE(17:0)	LPE	17:0	17:0	1	467.301	C22 H46 O7 N1 P1	16.161	-H	51.873	40.182	0	B	37570	1949000	14690	590200
							LPE(18:0)	LPE	18:0	18:0	1	481.317	C23 H48 O7 N1 P1	7.008	-H	177.343	180.364	0	B	22870	4055000	3500	631300
							LPE(18:0e)	LPE	18:0e	18:0e	1	467.338	C23 H50 O6 N1 P1	17.906	-H	1.73618e+06	445706	0	B	0	1736000	0	445700
							LPE(18:0p)	LPE	18:0p	18:0p	1	465.322	C23 H48 O6 N1 P1	16.645	-H	1.41228e+06	363368	0	B	0	1412000	0	363400
							LPE(18:1)	LPE	18:1	18:1	1	479.301	C23 H46 O7 N1 P1	15.741	+H	40.631	27.791	0	B	258200	10490000	69450	1930000
							LPE(18:1p)	LPE	18:1p	18:1p	1	463.306	C23 H46 O6 N1 P1	16.5	+Na	2.65623e+06	654019	0	B	0	2656000	0	654000
							LPE(22:5)	LPE	22:5	22:5	1	527.301	C27 H46 O7 N1 P1	15.176	-H	1.69138e+06	430812	0	A	0	1691000	0	430800
							LPE(22:6)	LPE	22:6	22:6	1	525.285	C27 H44 O7 N1 P1	14.562	-H	1.29242e+06	294783	0	A	0	1292000	0	294800
							LPG(16:0)	LPG	16:0	16:0	1	484.28	C22 H45 O9 N0 P1	14.04	-H	13.573	11.131	0	B	100800	1368000	32800	365100
							LPG(18:1)	LPG	18:1	18:1	1	510.296	C24 H47 O9 N0 P1	14.567	-H	51.562	24.327	0	B	55950	2885000	20350	495200
							LPG(20:4)	LPG	20:4	20:4	1	532.28	C26 H45 O9 N0 P1	13.333	-H	1.35226e+06	342261	0	B	0	1352000	0	342300
							LPG(22:5)	LPG	22:5	22:5	1	558.296	C28 H47 O9 N0 P1	14.059	-H	1.82373e+06	550024	0	B	0	1824000	0	550000
							LPG(22:6)	LPG	22:6	22:6	1	556.28	C28 H45 O9 N0 P1	13.412	-H	2.51465e+06	599705	0	B	0	2515000	0	599700
							LPI(16:0)	LPI	16:0	16:0	1	572.296	C25 H49 O12 N0 P1	13.803	-H	19.176	13.125	0.002	A	317000	6078000	89110	1170000
							LPI(17:0)	LPI	17:0	17:0	1	586.312	C26 H51 O12 N0 P1	14.842	-H	15.985	11.683	0.005	A	63310	1012000	21650	253000
							LPI(18:0)	LPI	18:0	18:0	1	600.327	C27 H53 O12 N0 P1	15.39	-H	11.642	7.021	0	A	242700	2825000	43670	306600
							LPI(18:1)	LPI	18:1	18:1	1	598.312	C27 H51 O12 N0 P1	14.361	-H	20.382	18.957	0	A	225000	4587000	45990	871800
							LPI(20:3)	LPI	20:3	20:3	1	622.312	C29 H51 O12 N0 P1	14.375	-H	1.34687e+06	326630	0	A	0	1347000	0	326600
							LPI(20:3)	LPI	20:3	20:3	1	622.312	C29 H51 O12 N0 P1	13.978	-H	10.796	8.178	0	A	145400	1570000	46800	382800
							LPI(20:4)	LPI	20:4	20:4	1	620.296	C29 H49 O12 N0 P1	13.069	-H	42.136	37.52	0	A	294800	12420000	64920	2436000
							LPI(22:5)	LPI	22:5	22:5	1	646.312	C31 H51 O12 N0 P1	13.853	-H	82.388	48.302	0	A	20740	1709000	8822	426100
							LPS(16:0)	LPS	16:0	16:0	1	497.275	C22 H44 O9 N1 P1	10.21	-H	1.21466e+06	181483	0	B	0	1215000	0	181500
							LPS(18:0)	LPS	18:0	18:0	1	525.307	C24 H48 O9 N1 P1	13.704	+H	52.649	40.503	0	B	202200	10650000	50080	2028000
							LPS(18:1)	LPS	18:1	18:1	1	523.291	C24 H46 O9 N1 P1	11.276	-H	4.05986e+06	661457	0	B	0	4060000	0	661500
							LPS(20:3)	LPS	20:3	20:3	1	547.291	C26 H46 O9 N1 P1	10.588	-H	154.229	67.562	0.002	B	5949	917600	2530	170900
							LPS(20:4)	LPS	20:4	20:4	1	545.275	C26 H44 O9 N1 P1	9.091	+H	1.98634e+06	342832	0	B	0	1986000	0	342800
							LPS(22:4)	LPS	22:4	22:4	1	573.307	C28 H48 O9 N1 P1	12.325	+H	1.75466e+06	356993	0	B	0	1755000	0	357000
							LPS(22:5)	LPS	22:5	22:5	1	571.291	C28 H46 O9 N1 P1	10.526	+H	2.96924e+06	547377	0	B	0	2969000	0	547400
							LPS(22:6)	LPS	22:6	22:6	1	569.275	C28 H44 O9 N1 P1	9.16	-H	1.22834e+06	202912	0	B	0	1228000	0	202900
							PC(18:0/20:3)	PC	18:0/20:3	38:3	2	811.609	C46 H86 O8 N1 P1	24.017	+H	21.1	23.659	0	B	24510000	517200000	6833000	161600000
							PC(18:0/20:4)	PC	18:0/20:4	38:4	2	809.593	C46 H84 O8 N1 P1	18.459	+H	15.958	10.284	0.001	B	3687000	58840000	580400	5969000
							PC(18:0/22:6)	PC	18:0/22:6	40:6	2	833.593	C48 H84 O8 N1 P1	17.961	+H	337.436	362.025	0.001	B	187200	63170000	20430	7395000
							PC(28:0)	PC	28:0	28:0	1	677.5	C36 H72 O8 N1 P1	22.516	+H	13.841	16.333	0	C	763500	10570000	235000	3838000
							PC(30:0)	PC	30:0	30:0	1	705.531	C38 H76 O8 N1 P1	16.116	+H	37.277	16.975	0.001	C	185300	6908000	36710	623100
							PC(30:0e)	PC	30:0e	30:0e	1	691.552	C38 H78 O7 N1 P1	23.317	+H	13.552	14.529	0	C	796500	10800000	264500	3843000
							PC(30:1)	PC	30:1	30:1	1	703.515	C38 H74 O8 N1 P1	22.612	+H	244.82	145.896	0	C	88690	21710000	37060	5408000
							PC(31:0)	PC	31:0	31:0	1	719.547	C39 H78 O8 N1 P1	17.124	+H	46.371	23.487	0.001	C	69330	3215000	13630	320100
							PC(31:1)	PC	31:1	31:1	1	717.531	C39 H76 O8 N1 P1	22.867	+H	72.745	40.744	0.001	C	167100	12160000	61240	2495000
							PC(32:0)	PC	32:0	32:0	2	733.562	C40 H80 O8 N1 P1	18.096	+H	15.784	12.082	0.002	C	2729000	43080000	371600	4490000
							PC(32:0e)	PC	32:0e	32:0e	1	719.583	C40 H82 O7 N1 P1	19.249	+H	44.091	24.946	0.001	C	89030	3926000	17500	436500
							PC(32:1)	PC	32:1	32:1	2	731.547	C40 H78 O8 N1 P1	23.089	+H	16.649	18.463	0	C	13660000	227500000	3067000	56630000
							PC(32:1e)	PC	32:1e	32:1e	1	717.567	C40 H80 O7 N1 P1	18.962	+H	79.546	40.559	0	C	42550	3385000	9593	389100
							PC(32:4e)	PC	32:4e	32:4e	1	711.52	C40 H74 O7 N1 P1	22.526	+H	187.984	154.687	0	C	62460	11740000	27040	4183000
							PC(33:0)	PC	33:0	33:0	1	747.578	C41 H82 O8 N1 P1	23.74	+H	24.737	36.337	0	C	1135000	28080000	262800	9548000
							PC(33:0p)	PC	33:0p	33:0p	1	731.583	C41 H82 O7 N1 P1	23.708	+H	21.807	17.314	0	C	623700	13600000	212700	3683000
							PC(33:1)	PC	33:1	33:1	1	745.562	C41 H80 O8 N1 P1	17.35	+H	12.961	10.288	0.001	C	670600	8692000	73870	760000
							PC(34:0)	PC	34:0	34:0	2	761.593	C42 H84 O8 N1 P1	24.167	+H	44.076	52.553	0	C	4081000	179900000	960200	50460000
							PC(34:0e)	PC	34:0e	34:0e	1	747.614	C42 H86 O7 N1 P1	21.043	+H	59.282	25.485	0	C	19120	1133000	4921	125400
							PC(34:1)	PC	34:1	34:1	2	759.578	C42 H82 O8 N1 P1	18.304	+H	17.798	12.197	0.001	C	12990000	231100000	1685000	20560000
							PC(34:1e)	PC	34:1e	34:1e	1	745.598	C42 H84 O7 N1 P1	19.359	+H	17.299	14.655	0.002	C	772900	13370000	69500	1018000
							PC(34:2e)	PC	34:2e	34:2e	1	743.583	C42 H82 O7 N1 P1	19.146	+H	17.337	12.332	0	C	473000	8200000	69570	858000
							PC(35:1)	PC	35:1	35:1	1	773.593	C43 H84 O8 N1 P1	19.242	+H	28.802	22.995	0.001	C	651400	18760000	75800	1743000
							PC(35:1)	PC	35:1	35:1	1	773.593	C43 H84 O8 N1 P1	18.899	+H	23.006	28.966	0.054	C	298700	6872000	30460	882300
							PC(36:1)	PC	36:1	36:1	2	787.609	C44 H86 O8 N1 P1	20.126	+H	27.299	21.062	0.002	C	9264000	252900000	1170000	24650000
							PC(36:1e)	PC	36:1e	36:1e	1	773.63	C44 H88 O7 N1 P1	24.797	+H	31.222	27.143	0	C	402400	12560000	100500	2728000
							PC(36:2p)	PC	36:2p	36:2p	1	769.598	C44 H84 O7 N1 P1	24.009	+H	10.827	15.645	0	C	3307000	35800000	435100	6807000
							PC(36:2p)	PC	36:2p	36:2p	1	769.598	C44 H84 O7 N1 P1	19.24	+H	23.989	16.16	0	C	55690	1336000	6917	111800
							PC(36:4)	PC	36:4	36:4	1	781.562	C44 H80 O8 N1 P1	18.318	+H	29.122	20.285	0.004	C	653700	19040000	93840	1904000
							PC(36:4p)	PC	36:4p	36:4p	1	765.567	C44 H80 O7 N1 P1	23.401	+H	11.189	13.127	0	C	7318000	81880000	2178000	28590000
							PC(36:5)	PC	36:5	36:5	1	779.547	C44 H78 O8 N1 P1	22.827	+H	16.624	19.742	0.032	C	1430000	23770000	497500	9821000
							PC(37:1)	PC	37:1	37:1	1	801.625	C45 H88 O8 N1 P1	20.94	+H	761.492	116.613	0.014	C	9143	6962000	3791	442100
							PC(37:2)	PC	37:2	37:2	1	799.609	C45 H86 O8 N1 P1	19.301	+H	29.447	11.193	0.003	C	96530	2843000	17340	194100
							PC(37:3)	PC	37:3	37:3	1	797.593	C45 H84 O8 N1 P1	23.702	+H	61.915	43.21	0	C	571000	35350000	229700	9926000
							PC(37:5)	PC	37:5	37:5	1	793.562	C45 H80 O8 N1 P1	23.018	+H	47.162	47.892	0	C	243400	11480000	74660	3576000
							PC(38:1)	PC	38:1	38:1	1	815.64	C46 H90 O8 N1 P1	21.671	+H	734.803	118.857	0	C	8283	6086000	3423	406800
							PC(38:2)	PC	38:2	38:2	1	813.625	C46 H88 O8 N1 P1	20.347	+H	63.936	35.344	0.037	C	190700	12190000	14760	521800
							PC(38:3)	PC	38:3	38:3	1	811.609	C46 H86 O8 N1 P1	19.795	+H	147.628	105.059	0.001	C	94490	13950000	15640	1643000
							PC(38:3)	PC	38:3	38:3	2	811.609	C46 H86 O8 N1 P1	19.229	+H	12.806	9.871	0.001	C	3890000	49820000	594100	5864000
							PC(38:4)	PC	38:4	38:4	1	809.593	C46 H84 O8 N1 P1	20.113	+H	35.98	28.941	0.005	C	704000	25330000	102100	2954000
							PC(38:4e)	PC	38:4e	38:4e	1	795.614	C46 H86 O7 N1 P1	24.164	+H	16.905	16.712	0	C	844600	14280000	245300	4100000
							PC(38:4p)	PC	38:4p	38:4p	1	793.598	C46 H84 O7 N1 P1	17.751	+H	39.646	13.251	0.002	C	94600	3751000	22880	303200
							PC(38:5)	PC	38:5	38:5	2	807.578	C46 H82 O8 N1 P1	16.637	+H	56.996	48.558	0.003	C	943300	53760000	104800	5088000
							PC(38:6)	PC	38:6	38:6	1	805.562	C46 H80 O8 N1 P1	16.019	+H	204.124	79.319	0	C	124800	25470000	37190	2950000
							PC(38:6)	PC	38:6	38:6	1	805.562	C46 H80 O8 N1 P1	15.726	+H	13.799	5.224	0.123	C	173200	2390000	42360	221300
							PC(38:6e)	PC	38:6e	38:6e	1	791.583	C46 H82 O7 N1 P1	17.423	+H	48.671	15.495	0.001	C	95130	4630000	35230	545800
							PC(38:6e)	PC	38:6e	38:6e	1	791.583	C46 H82 O7 N1 P1	17.165	+H	33.718	14.176	0.002	C	39020	1316000	7035	99720
							PC(38:6p)	PC	38:6p	38:6p	1	789.567	C46 H80 O7 N1 P1	23.306	+H	61.039	115.661	0	C	1550000	94590000	263800	30510000
							PC(39:3)	PC	39:3	39:3	1	825.625	C47 H88 O8 N1 P1	20.224	+H	2.48454e+06	243222	0	C	0	2485000	0	243200
							PC(39:5)	PC	39:5	39:5	1	821.593	C47 H84 O8 N1 P1	17.601	+H	64.935	63.749	0.056	C	120400	7820000	25980	1656000
							PC(39:6)	PC	39:6	39:6	1	819.578	C47 H82 O8 N1 P1	23.355	+H	21.343	30.537	0	C	1397000	29810000	286400	8745000
							PC(40:3)	PC	40:3	40:3	1	839.64	C48 H90 O8 N1 P1	24.771	+H	227.005	162.011	0	C	53720	12200000	17050	2762000
							PC(40:5)	PC	40:5	40:5	1	835.609	C48 H86 O8 N1 P1	19.193	+H	16.269	14.1	0	C	103100	1677000	12310	173600
							PC(40:5)	PC	40:5	40:5	2	835.609	C48 H86 O8 N1 P1	18.538	+H	105.139	78.604	0.001	C	653300	68690000	102900	8085000
							PC(40:5e)	PC	40:5e	40:5e	1	821.63	C48 H88 O7 N1 P1	19.618	+H	1.31334e+06	166992	0	C	0	1313000	0	167000
							PC(40:6)	PC	40:6	40:6	1	833.593	C48 H84 O8 N1 P1	19.832	+H	345.562	72.384	0.027	C	3725	1287000	2510	181700
							PC(40:6)	PC	40:6	40:6	1	833.593	C48 H84 O8 N1 P1	19.21	+H	14.531	12.262	0.001	C	229400	3333000	30000	367800
							PC(40:6)	PC	40:6	40:6	1	833.593	C48 H84 O8 N1 P1	17.634	+H	42.478	108.993	0.064	C	56300	2392000	13590	1481000
							PC(40:6e)	PC	40:6e	40:6e	1	819.614	C48 H86 O7 N1 P1	19.289	+H	353.083	113.168	0.003	C	2862	1011000	1242	140600
							PC(40:6p)	PC	40:6p	40:6p	1	817.598	C48 H84 O7 N1 P1	18.709	+H	33.256	25.596	0	C	51610	1716000	9661	247300
							PC(40:6p)	PC	40:6p	40:6p	1	817.598	C48 H84 O7 N1 P1	17.579	+H	244.781	105.745	0.008	C	8767	2146000	2772	293200
							PC(40:7)	PC	40:7	40:7	1	831.578	C48 H82 O8 N1 P1	16.161	+H	115.843	38.194	0	C	52120	6038000	12580	480700
							PC(40:7p)	PC	40:7p	40:7p	1	815.583	C48 H82 O7 N1 P1	16.899	+H	126.804	35.583	0.001	C	10850	1375000	4153	147800
							PC(40:9)	PC	40:9	40:9	1	827.547	C48 H78 O8 N1 P1	23.096	+H	2.23552e+07	7.99802e+06	0	C	0	22360000	0	7998000
							PC(41:5)	PC	41:5	41:5	1	849.625	C49 H88 O8 N1 P1	24.168	+H	17.154	39.123	0	C	828700	14210000	111200	4349000
							PC(42:4p)	PC	42:4p	42:4p	1	849.661	C50 H92 O7 N1 P1	21.323	+H	185.657	71.386	0	C	9611	1784000	3345	238800
							PC(42:6)	PC	42:6	42:6	1	861.625	C50 H88 O8 N1 P1	23.921	+H	12.923	34.704	0	C	1039000	13430000	104100	3611000
							PC(42:6e)	PC	42:6e	42:6e	1	847.645	C50 H90 O7 N1 P1	20.799	+H	1.50672e+06	168782	0	C	0	1507000	0	168800
							PC(42:7)	PC	42:7	42:7	1	859.609	C50 H86 O8 N1 P1	18.015	+H	154.292	51.669	0.007	C	9018	1391000	3225	166600
							PC(42:7e)	PC	42:7e	42:7e	1	845.63	C50 H88 O7 N1 P1	24.587	+H	493.301	246.763	0	C	35700	17610000	16470	4065000
							PE(16:0p/20:4)	PE	16:0p/20:4	36:4p	1	723.52	C41 H74 O7 N1 P1	21.539	+H	210.038	193.597	0	B	73200	15380000	33600	6504000
							PE(16:0p/22:5)	PE	16:0p/22:5	38:5p	1	749.536	C43 H76 O7 N1 P1	21.601	+H	6255.38	3559.83	0.002	A	2610	16330000	1762	6274000
							PE(16:0p/22:6)	PE	16:0p/22:6	38:6p	1	747.52	C43 H74 O7 N1 P1	21.511	+H	101.856	96.182	0	B	68330	6960000	30960	2977000
							PE(18:0/20:4)	PE	18:0/20:4	38:4	1	767.547	C43 H78 O8 N1 P1	21.716	+H	109.191	96.861	0	B	92390	10090000	45500	4407000
							PE(18:0e)	PE	18:0e	18:0e	1	481.317	C23 H48 O7 N1 P1	17.057	+H	53.467	52.877	0	C	833600	44570000	204600	10820000
							PE(18:0e)	PE	18:0e	18:0e	1	481.317	C23 H48 O7 N1 P1	16.71	+H	161.007	57.178	0.005	C	50010	8052000	13750	786200
							PE(18:0p)	PE	18:0p	18:0p	1	479.301	C23 H46 O7 N1 P1	15.735	+H	45.716	32.083	0	C	254500	11630000	65590	2104000
							PE(18:1p/22:6)	PE	18:1p/22:6	40:7p	1	773.536	C45 H76 O7 N1 P1	21.57	+H	3.44924e+06	1.55008e+06	0	B	0	3449000	0	1550000
							PI(16:0/20:4)	PI	16:0/20:4	36:4	1	858.526	C45 H79 O13 N0 P1	20.796	-H	3.50029e+06	1.44843e+06	0	A	0	3500000	0	1448000
							PI(18:0/18:1)	PI	18:0/18:1	36:1	1	864.573	C45 H85 O13 N0 P1	21.386	-H	4.47551e+06	1.72625e+06	0	A	0	4476000	0	1726000
							PI(18:0/20:4)	PI	18:0/20:4	38:4	1	886.557	C47 H83 O13 N0 P1	21.178	-H	33.031	26.08	0.001	A	823400	27200000	384100	10020000
							PI(18:1/20:4)	PI	18:1/20:4	38:5	1	884.542	C47 H81 O13 N0 P1	20.887	-H	4.36344e+06	1.76579e+06	0	A	0	4363000	0	1766000
							PS(39:1)	PS	39:1	39:1	1	831.599	C45 H86 O10 N1 P1	18.484	-H	33.311	31.052	0	C	249100	8297000	21810	677300
							SM(d34:0)	SM	d34:0	d34:0	1	704.583	C39 H81 O6 N2 P1	16.691	+HCOO	14.83	12.384	0.002	C	212000	3144000	37430	463500
							SM(d34:1)	SM	d34:1	d34:1	1	702.568	C39 H79 O6 N2 P1	15.704	+H	10.059	8.24	0.049	C	19460000	195800000	3464000	28540000
							SM(d36:0)	SM	d36:0	d36:0	1	732.615	C41 H85 O6 N2 P1	23.714	+H	22.419	24.784	0	C	1171000	26250000	341600	8467000
							SM(d36:1)	SM	d36:1	d36:1	1	730.599	C41 H83 O6 N2 P1	18.004	+H	13.119	9.706	0.001	C	2019000	26490000	240900	2338000
							SM(d37:1)	SM	d37:1	d37:1	1	744.615	C42 H85 O6 N2 P1	23.777	+H	45.038	41.339	0	C	528600	23800000	172200	7118000
							SM(d38:0)	SM	d38:0	d38:0	1	760.646	C43 H89 O6 N2 P1	20.608	+H	2.09096e+06	215788	0	C	0	2091000	0	215800
							SM(d38:1)	SM	d38:1	d38:1	1	758.63	C43 H87 O6 N2 P1	19.944	+H	997.627	166.893	0	C	18710	18670000	11570	1931000
							SM(d38:2)	SM	d38:2	d38:2	1	756.615	C43 H85 O6 N2 P1	18.313	+H	68.084	22.108	0.01	C	45960	3129000	8125	179600
							SM(d38:4)	SM	d38:4	d38:4	1	752.583	C43 H81 O6 N2 P1	17.98	+H	13.88	9.372	0	C	154900	2150000	27660	259200
							SM(d39:1)	SM	d39:1	d39:1	1	772.646	C44 H89 O6 N2 P1	20.846	+H	11.562	13.824	0.001	C	428600	4956000	32540	449900
							SM(d39:2)	SM	d39:2	d39:2	1	770.63	C44 H87 O6 N2 P1	23.844	+H	593.018	230.095	0.001	C	40410	23960000	16730	3848000
							SM(d40:0)	SM	d40:0	d40:0	1	788.677	C45 H93 O6 N2 P1	22.265	+H	3.1292e+06	292790	0	C	0	3129000	0	292800
							SM(d40:1)	SM	d40:1	d40:1	1	786.662	C45 H91 O6 N2 P1	21.689	+H	48.984	48.017	0.001	C	771700	37800000	70260	3373000
							SM(d40:2)	SM	d40:2	d40:2	1	784.646	C45 H89 O6 N2 P1	20.201	+H	90.365	36.325	0.037	C	200400	18110000	28180	1024000
							SM(d40:2)	SM	d40:2	d40:2	1	784.646	C45 H89 O6 N2 P1	19.92	+H	96.036	51.913	0.005	C	207300	19910000	30430	1580000
							SM(d40:4)	SM	d40:4	d40:4	1	780.615	C45 H85 O6 N2 P1	24.113	+H	125.932	83.419	0	C	169200	21310000	66920	5583000
							SM(d41:1)	SM	d41:1	d41:1	1	800.677	C46 H93 O6 N2 P1	22.481	+H	13.22	11.324	0	C	648300	8570000	87870	995100
							SM(d41:2)	SM	d41:2	d41:2	1	798.662	C46 H91 O6 N2 P1	21.082	+H	15.644	6.7	0.023	C	239300	3743000	32620	218600
							SM(d41:2)	SM	d41:2	d41:2	1	798.662	C46 H91 O6 N2 P1	20.752	+H	131.555	75.235	0.001	C	60560	7967000	9897	744600
							SM(d41:3)	SM	d41:3	d41:3	1	796.646	C46 H89 O6 N2 P1	23.985	+H	71.249	99.013	0	C	288400	20550000	55890	5534000
							SM(d41:4)	SM	d41:4	d41:4	1	794.63	C46 H87 O6 N2 P1	24.493	+H	54.566	37.143	0	C	187500	10230000	77520	2879000
							SM(d42:1)	SM	d42:1	d42:1	1	814.693	C47 H95 O6 N2 P1	23.223	+H	44.878	30.891	0.003	C	553300	24830000	82740	2556000
							SM(d42:1)	SM	d42:1	d42:1	1	814.693	C47 H95 O6 N2 P1	22.178	+H	2.6101e+06	255969	0.004	C	0	2610000	0	256000
							SM(d42:2)	SM	d42:2	d42:2	1	812.677	C47 H93 O6 N2 P1	21.91	+H	35.251	22.105	0.002	C	323000	11390000	40980	906000
							SM(d42:2)	SM	d42:2	d42:2	1	812.677	C47 H93 O6 N2 P1	21.591	+H	127.428	123.856	0.001	C	409200	52140000	46780	5794000
							SM(d42:3)	SM	d42:3	d42:3	1	810.662	C47 H91 O6 N2 P1	20.072	+H	70.749	46.837	0.002	C	358900	25390000	40180	1882000
							SM(d42:4)	SM	d42:4	d42:4	1	808.646	C47 H89 O6 N2 P1	21.689	+H	124.786	43.383	0.001	C	42360	5286000	12330	534800
							SM(d42:5)	SM	d42:5	d42:5	1	806.63	C47 H87 O6 N2 P1	20.194	+H	18.306	3.759	0.029	C	118900	2177000	44800	168400
							SM(d43:2)	SM	d43:2	d43:2	1	826.693	C48 H95 O6 N2 P1	25.417	+H	206	129.275	0	C	77720	16010000	29630	3831000
							SM(d43:4)	SM	d43:4	d43:4	1	822.662	C48 H91 O6 N2 P1	25.348	+H	16.743	20.326	0	C	1340000	22430000	243800	4955000
							SM(d43:5)	SM	d43:5	d43:5	1	820.646	C48 H89 O6 N2 P1	24.551	+H	281.199	162.328	0	C	69820	19630000	31990	5193000
							SM(d44:2)	SM	d44:2	d44:2	1	840.708	C49 H97 O6 N2 P1	25.946	+H	8.82303e+06	1.54773e+06	0	C	0	8823000	0	1548000
							SM(d44:3)	SM	d44:3	d44:3	1	838.693	C49 H95 O6 N2 P1	25.156	+H	8.80273e+06	1.67698e+06	0	C	0	8803000	0	1677000
							SM(d44:4)	SM	d44:4	d44:4	1	836.677	C49 H93 O6 N2 P1	23.224	+H	45.229	21.502	0.003	C	83360	3770000	19400	417100
							SM(d44:5)	SM	d44:5	d44:5	1	834.662	C49 H91 O6 N2 P1	21.596	+H	355.819	177.095	0.004	C	23710	8436000	5906	1046000
							SM(d44:6)	SM	d44:6	d44:6	1	832.646	C49 H89 O6 N2 P1	20.1	+H	332.185	78.364	0	C	11000	3653000	4636	363300
							TG(16:0/16:0/22:6)	TG	16:0/16:0/22:6	54:6	1	878.736	C57 H98 O6	27.988	+NH4	24.525	36.842	0.005	A	106200	2604000	9356	344700
							TG(16:0/18:1/20:5)	TG	16:0/18:1/20:5	54:6	1	878.736	C57 H98 O6	27.701	+NH4	30.728	7.807	0.074	A	357900	11000000	53340	416500
							TG(16:0/18:1/22:5)	TG	16:0/18:1/22:5	56:6	1	906.768	C59 H102 O6	28.243	+NH4	948.014	390.974	0.003	A	9554	9057000	4144	1620000
							TG(16:0/18:1/22:6)	TG	16:0/18:1/22:6	56:7	1	904.752	C59 H100 O6	27.995	+NH4	432.144	127.136	0.002	A	8946	3866000	5160	656100
							TG(16:1/18:1/22:5)	TG	16:1/18:1/22:5	56:7	1	904.752	C59 H100 O6	27.699	+NH4	656.135	61.71	0.009	B	7265	4767000	5178	319500
							TG(18:0/18:1/20:4)	TG	18:0/18:1/20:4	56:5	1	908.783	C59 H104 O6	28.714	+NH4	25.036	21.017	0.007	A	193000	4832000	25100	527600
							TG(18:0p/16:0/16:0)	TG	18:0p/16:0/16:0	50:0p	1	818.773	C53 H102 O5	29.687	+NH4	10.355	8.583	0.006	B	63320	655700	14890	127800
							TG(58:6)	TG	58:6	58:6	1	934.799	C61 H106 O6	28.836	+NH4	35384.3	10232.3	0.067	C	141.9	5021000	55.12	564000

## Sheet: ImPSC1 CM
Lipids identified in the conditioned media of murine immortalized PSCs (ImPSC1)
Filters used							LipidMolec	Class	FA	FA Group Key	Counts	Calc Mass	Formula	BaseRt	MainIon	ARatio[s1/c]	HRatio[s1/c]	APValue[s1]	MainGrade[s1]	MainArea[c]	MainArea[s1]	MainHeight[c]	MainHeight[s1]
Area ratio ≥ 10-fold fresh medium controls							Cer(d16:1)	Cer	d16:1	d16:1	1	285.23	C16 H31 O3 N1	9.705	-H	1381.85	716.283	0	C	25730	35560000	10950	7844000
Retention time ≥ 2 min							Cer(d18:1)	Cer	d18:1	d18:1	1	313.262	C18 H35 O3 N1	2.554	-H	180.379	130.561	0.003	C	4321	779400	706.3	92210
							Cer(d20:1)	Cer	d20:1	d20:1	1	341.293	C20 H39 O3 N1	4.855	-H	452.342	158.69	0.005	C	4422	2000000	1076	170700
							Cer(d20:2)	Cer	d20:2	d20:2	1	339.277	C20 H37 O3 N1	14.116	-H	34153.3	5215.24	0.068	C	288.8	9863000	227.1	1184000
MainGrade (level of lipid identification)							Cer(d16:1/16:0)	Cer	d16:1/16:0	d32:1	1	509.481	C32 H63 O3 N1	16.408	+H	32.528	16.853	0	B	21750	707400	8242	138900
A	Lipid class and FA were completely identified						Cer(d17:1/16:0)	Cer	d17:1/16:0	d33:1	1	523.496	C33 H65 O3 N1	17.432	+H	91.172	45.149	0	B	8856	807400	3269	147600
B	Lipid class and some FA were identified						Cer(d18:0/16:0)	Cer	d18:0/16:0	d34:0	1	539.528	C34 H69 O3 N1	23.419	-H	22.011	13.75	0	A	521600	11480000	232300	3194000
C	Lipid class or FA were identified						Cer(d18:1/16:0)	Cer	d18:1/16:0	d34:1	1	537.512	C34 H67 O3 N1	20.022	+H	46.307	34.48	0.18	B	190800	8836000	37380	1289000
D	Lipid ID by other fragment ions (H2O loss etc.)						Cer(d18:1/16:0)	Cer	d18:1/16:0	d34:1	1	537.512	C34 H67 O3 N1	18.446	+H	108.428	113.71	0.006	B	243300	26380000	40250	4577000
							Cer(d18:2/16:0)	Cer	d18:2/16:0	d34:2	1	535.496	C34 H65 O3 N1	22.827	-H	48.074	52.392	0	A	808000	38840000	268700	14080000
							Cer(d15:0/20:1)	Cer	d15:0/20:1	d35:1	1	551.528	C35 H69 O3 N1	23.522	-H	7.29364e+06	2.48615e+06	0	B	0	7294000	0	2486000
FA = fatty acid							Cer(d18:1/18:0)	Cer	d18:1/18:0	d36:1	1	565.543	C36 H71 O3 N1	20.36	+H	15.392	13.258	0.007	B	69570	1071000	14100	186900
							Cer(d18:1/20:0)	Cer	d18:1/20:0	d38:1	1	593.575	C38 H75 O3 N1	24.539	-H	60.555	36.492	0	A	242400	14680000	99280	3623000
							Cer(d18:1/22:0)	Cer	d18:1/22:0	d40:1	1	621.606	C40 H79 O3 N1	24.79	+H	12.034	11.599	0.16	B	113800	1369000	18130	210300
							Cer(d18:1/22:0)	Cer	d18:1/22:0	d40:1	1	621.606	C40 H79 O3 N1	23.626	+H	10.083	14.384	0.011	B	230300	2322000	27440	394800
							Cer(d18:1/22:1)	Cer	d18:1/22:1	d40:2	1	619.59	C40 H77 O3 N1	24.62	-H	1.37444e+07	3.27873e+06	0	A	0	13740000	0	3279000
							Cer(d15:0/26:1)	Cer	d15:0/26:1	d41:1	1	635.622	C41 H81 O3 N1	25.979	-H	22.919	21.696	0	A	494600	11330000	103900	2255000
							Cer(d15:0/26:2)	Cer	d15:0/26:2	d41:2	1	633.606	C41 H79 O3 N1	25.043	-H	1.68587e+07	3.84685e+06	0	A	0	16860000	0	3847000
							Cer(d18:1/24:0)	Cer	d18:1/24:0	d42:1	1	649.637	C42 H83 O3 N1	22.02	-H	2.54653e+07	2.4949e+06	0	A	0	25470000	0	2495000
							Cer(d18:1/24:1)	Cer	d18:1/24:1	d42:2	1	647.622	C42 H81 O3 N1	24.696	+H	78.423	28.676	0.133	B	27930	2190000	11460	328500
							Cer(d18:1/24:1)	Cer	d18:1/24:1	d42:2	1	647.622	C42 H81 O3 N1	23.524	+H	7.11065e+06	1.43463e+06	0	B	0	7111000	0	1435000
							Cer(d18:2/24:0)	Cer	d18:2/24:0	d42:2	1	647.622	C42 H81 O3 N1	23.804	+H	267.464	50.668	0	B	3404	910400	2721	137900
							Cer(d18:2/24:1)	Cer	d18:2/24:1	d42:3	1	645.606	C42 H79 O3 N1	22.241	+H	1.28987e+06	222350	0	B	0	1290000	0	222300
							CerP(d23:1)	CerP	d23:1	d23:1	1	463.306	C23 H46 O6 N1 P1	16.44	-H	232208	80029.2	0	D	660.5	153400000	418.2	33470000
							CerP(d25:0)	CerP	d25:0	d25:0	1	493.353	C25 H52 O6 N1 P1	19.159	-H	3.37923e+06	992205	0	D	0	3379000	0	992200
							CerP(d42:1)	CerP	d42:1	d42:1	1	729.604	C42 H84 O6 N1 P1	25.877	-H	80.575	36.38	0	C	97690	7871000	42030	1529000
							CerP(d42:2)	CerP	d42:2	d42:2	1	727.588	C42 H82 O6 N1 P1	24.958	-H	107.669	57.217	0.015	C	257700	27740000	72740	4162000
							cPA(14:0)	cPA	14:0	14:0	1	364.202	C17 H33 O6 N0 P1	11.88	-H	3.78476e+06	849436	0	B	0	3785000	0	849400
							cPA(15:0)	cPA	15:0	15:0	1	378.217	C18 H35 O6 N0 P1	13.466	-H	1.5695e+06	453843	0	B	0	1569000	0	453800
							cPA(16:0)	cPA	16:0	16:0	1	392.233	C19 H37 O6 N0 P1	14.588	-H	227.899	248.971	0.006	B	301500	68710000	94030	23410000
							cPA(16:1)	cPA	16:1	16:1	1	390.217	C19 H35 O6 N0 P1	13.155	-H	1.14115e+07	2.97053e+06	0	B	0	11410000	0	2971000
							cPA(16:1)	cPA	16:1	16:1	1	390.217	C19 H35 O6 N0 P1	12.875	-H	4.63634e+06	1.24688e+06	0	B	0	4636000	0	1247000
							cPA(18:0)	cPA	18:0	18:0	1	420.264	C21 H41 O6 N0 P1	16.376	-H	10.637	10.903	0.006	B	1407000	14970000	418300	4561000
							cPA(18:1)	cPA	18:1	18:1	1	418.248	C21 H39 O6 N0 P1	15.07	-H	142.065	103.937	0.007	B	155100	22040000	42880	4456000
							cPA(18:2)	cPA	18:2	18:2	1	416.233	C21 H37 O6 N0 P1	13.891	-H	15.754	11.519	0.01	B	74030	1166000	25080	288800
							cPA(20:3)	cPA	20:3	20:3	1	442.248	C23 H39 O6 N0 P1	15.039	-H	1.31627e+06	372506	0	B	0	1316000	0	372500
							ChE(14:0)	ChE	14:0	14:0	1	596.553	C41 H72 O2	28.502	+NH4	890934	241945	0	B	0	890900	0	241900
							ChE(16:0)	ChE	16:0	16:0	1	624.585	C43 H76 O2	29.249	+NH4	19947.1	3574.92	0	B	638.3	12730000	851.2	3043000
							ChE(16:1)	ChE	16:1	16:1	1	622.569	C43 H74 O2	28.502	+NH4	478.459	418.434	0.019	B	40850	19540000	10700	4477000
							ChE(17:0)	ChE	17:0	17:0	1	638.6	C44 H78 O2	25.6	+NH4	198.981	87.425	0.333	B	232800	46320000	17610	1540000
							ChE(17:1)	ChE	17:1	17:1	1	636.585	C44 H76 O2	28.881	+NH4	6.27146e+06	1.43127e+06	0	B	0	6271000	0	1431000
							ChE(18:0)	ChE	18:0	18:0	1	652.616	C45 H80 O2	29.853	+NH4	477895	149006	0	B	0	477900	0	149000
							ChE(18:1)	ChE	18:1	18:1	1	650.6	C45 H78 O2	29.223	+NH4	301.689	261.217	0.001	B	278700	84090000	69590	18180000
							ChE(18:2)	ChE	18:2	18:2	1	648.585	C45 H76 O2	28.577	+NH4	27.61	25.748	0.001	B	3548000	97960000	766300	19730000
							ChE(18:3)	ChE	18:3	18:3	1	646.569	C45 H74 O2	27.935	+NH4	85.25	80.317	0.002	B	169800	14480000	31920	2564000
							ChE(19:3)	ChE	19:3	19:3	1	660.585	C46 H76 O2	28.453	+NH4	113.454	52.882	0.002	B	9899	1123000	4333	229100
							ChE(20:1)	ChE	20:1	20:1	1	678.631	C47 H82 O2	29.806	+NH4	56.209	12.63	0.001	B	10770	605400	11730	148100
							ChE(20:2)	ChE	20:2	20:2	1	676.616	C47 H80 O2	29.267	+NH4	57.785	44.84	0.001	B	37820	2185000	11620	521100
							ChE(20:3)	ChE	20:3	20:3	1	674.6	C47 H78 O2	28.683	+NH4	117.141	103.749	0.002	B	222600	26080000	49780	5164000
							ChE(20:4)	ChE	20:4	20:4	1	672.585	C47 H76 O2	28.176	+NH4	381.659	333.915	0.002	B	407600	155600000	82970	27710000
							ChE(20:5)	ChE	20:5	20:5	1	670.569	C47 H74 O2	27.498	+NH4	4134.27	1801.29	0.002	B	10240	42310000	4625	8332000
							ChE(22:4)	ChE	22:4	22:4	1	700.616	C49 H80 O2	28.797	+NH4	270.378	55.921	0.015	B	4155	1123000	4044	226200
							ChE(22:5)	ChE	22:5	22:5	1	698.6	C49 H78 O2	28.206	+NH4	1.40548e+07	3.28129e+06	0	B	0	14050000	0	3281000
							ChE(22:6)	ChE	22:6	22:6	1	696.585	C49 H76 O2	27.786	+NH4	8065.64	4615.07	0	B	9127	73610000	3286	15160000
							ChE(24:5)	ChE	24:5	24:5	1	726.631	C51 H82 O2	28.906	+NH4	4827.6	1214.3	0	B	192.4	928700	192.1	233300
							dMePE(32:1p)	dMePE	32:1p	32:1p	1	701.536	C39 H76 O7 N1 P1	21.756	-H	1.62006e+07	6.94489e+06	0	C	0	16200000	0	6945000
							dMePE(34:3p)	dMePE	34:3p	34:3p	1	725.536	C41 H76 O7 N1 P1	21.725	-H	9.12866e+06	3.26432e+06	0	C	0	9129000	0	3264000
							dMePE(36:3p)	dMePE	36:3p	36:3p	1	753.567	C43 H80 O7 N1 P1	21.947	-H	6.19813e+06	2.36794e+06	0	C	0	6198000	0	2368000
							dMePE(36:4p)	dMePE	36:4p	36:4p	1	751.552	C43 H78 O7 N1 P1	21.754	-H	5.36956e+06	1.90953e+06	0	C	0	5370000	0	1910000
							FA(16:0)	FA	16:0	16:0	Manually confirmed
							FA(16:1)	FA	16:1	16:1	Manually confirmed
							FA(18:0)	FA	18:0	18:0	Manually confirmed
							FA(18:1)	FA	18:1	18:1	Manually confirmed
							FA(18:2)	FA	18:2	18:2	1	280.24	O2 H32 C18	13.472	-H	174.774	319.214	0	C	3532000	617200000	578100	184500000
							FA(20:4)	FA	20:4	20:4	1	304.24	O2 H32 C20	13.147	-H	16.952	16.387	0.392	C	4931000	83600000	1487000	24370000
							LdMePE(16:0)	LdMePE	16:0	16:0	1	481.317	C23 H48 O7 N1 P1	4.021	-H	692.74	433.689	0.001	B	15260	10570000	2783	1207000
							LdMePE(16:0)	LdMePE	16:0	16:0	1	481.317	C23 H48 O7 N1 P1	3.534	-H	2693.44	317.612	0.003	B	463.4	1248000	518.6	164700
							LdMePE(16:1)	LdMePE	16:1	16:1	1	479.301	C23 H46 O7 N1 P1	2.744	-H	3.20988e+06	237775	0	B	0	3210000	0	237800
							LdMePE(18:0)	LdMePE	18:0	18:0	1	509.348	C25 H52 O7 N1 P1	6.962	-H	23.649	27.892	0.002	B	79450	1879000	11240	313500
							LdMePE(18:1)	LdMePE	18:1	18:1	1	507.332	C25 H50 O7 N1 P1	4.729	-H	6237.49	473.105	0.002	B	494.8	3086000	556.1	263100
							LPA(14:0)	LPA	14:0	14:0	1	382.212	C17 H35 O7 N0 P1	4.499	-H	1347.16	366.456	0	A	3753	5056000	2425	888800
							LPA(14:0)	LPA	14:0	14:0	1	382.212	C17 H35 O7 N0 P1	3.874	-H	635697	84467.6	0	A	0	635700	0	84470
							LPA(15:0)	LPA	15:0	15:0	1	396.228	C18 H37 O7 N0 P1	6.762	-H	196.691	45.968	0	A	9669	1902000	7668	352500
							LPA(16:0)	LPA	16:0	16:0	1	410.243	C19 H39 O7 N0 P1	9.043	-H	91.335	78.01	0	A	476800	43550000	100800	7864000
							LPA(16:0)	LPA	16:0	16:0	1	410.243	C19 H39 O7 N0 P1	8.383	-H	129.417	77.712	0	A	36380	4708000	7308	567900
							LPA(16:0p)	LPA	16:0p	16:0p	1	394.248	C19 H39 O6 N0 P1	10.698	-H	1.00314e+06	186358	0	B	0	1003000	0	186400
							LPA(16:1)	LPA	16:1	16:1	1	408.228	C19 H37 O7 N0 P1	6.867	-H	1.63207e+06	106981	0.001	A	0	1632000	0	107000
							LPA(16:1)	LPA	16:1	16:1	1	408.228	C19 H37 O7 N0 P1	6.285	-H	3475.57	1613.35	0	A	9057	31480000	3636	5866000
							LPA(16:1)	LPA	16:1	16:1	1	408.228	C19 H37 O7 N0 P1	5.814	-H	2179.33	852.873	0	A	13760	29990000	5360	4572000
							LPA(16:1)	LPA	16:1	16:1	1	408.228	C19 H37 O7 N0 P1	5.45	-H	4497.83	288.758	0.094	A	2031	9136000	2555	737800
							LPA(16:1)	LPA	16:1	16:1	1	408.228	C19 H37 O7 N0 P1	5.192	-H	1346.41	186.452	0	A	2054	2765000	2493	464800
							LPA(16:2)	LPA	16:2	16:2	1	406.212	C19 H35 O7 N0 P1	4.578	-H	3.71247e+06	603823	0	A	0	3712000	0	603800
							LPA(17:1)	LPA	17:1	17:1	1	422.243	C20 H39 O7 N0 P1	8.577	-H	615873	114129	0.003	A	0	615900	0	114100
							LPA(18:1)	LPA	18:1	18:1	1	436.259	C21 H41 O7 N0 P1	10.177	-H	259.708	177.489	0	A	114500	29740000	22270	3953000
							LPA(18:1)	LPA	18:1	18:1	1	436.259	C21 H41 O7 N0 P1	9.585	-H	2216.73	458.181	0.021	A	3305	7325000	767.3	351600
							LPA(18:2)	LPA	18:2	18:2	1	434.243	C21 H39 O7 N0 P1	8.517	-H	1.40805e+06	224384	0	A	0	1408000	0	224400
							LPA(18:2)	LPA	18:2	18:2	1	434.243	C21 H39 O7 N0 P1	7.957	-H	21.281	8.14	0	A	18620	396300	14160	115300
							LPA(18:2)	LPA	18:2	18:2	1	434.243	C21 H39 O7 N0 P1	7.67	-H	36.897	21.529	0	A	99260	3662000	21970	473000
							LPA(18:3)	LPA	18:3	18:3	1	432.228	C21 H37 O7 N0 P1	5.917	-H	2.38208e+06	436099	0	A	0	2382000	0	436100
							LPA(20:2)	LPA	20:2	20:2	1	462.275	C23 H43 O7 N0 P1	11.553	-H	950680	172795	0	A	0	950700	0	172800
							LPA(20:3)	LPA	20:3	20:3	1	460.259	C23 H41 O7 N0 P1	10.248	-H	2.88117e+06	499430	0	A	0	2881000	0	499400
							LPA(20:3)	LPA	20:3	20:3	1	460.259	C23 H41 O7 N0 P1	9.423	-H	211.617	37.473	0	A	3304	699200	2917	109300
							LPA(20:4)	LPA	20:4	20:4	1	458.243	C23 H39 O7 N0 P1	7.796	-H	4.49517e+06	771690	0	A	0	4495000	0	771700
							LPA(20:5)	LPA	20:5	20:5	1	456.228	C23 H37 O7 N0 P1	5.639	-H	645924	114068	0	A	0	645900	0	114100
							LPA(22:5)	LPA	22:5	22:5	1	484.259	C25 H41 O7 N0 P1	9.243	-H	820748	165039	0	A	0	820700	0	165000
							LPA(22:6)	LPA	22:6	22:6	1	482.243	C25 H39 O7 N0 P1	8.021	-H	1.21768e+06	234925	0	A	0	1218000	0	234900
							LPC(12:0)	LPC	12:0	12:0	1	439.27	C20 H42 O7 N1 P1	14.121	+H	606.589	141.992	0	B	22430	13610000	9508	1350000
							LPC(13:0)	LPC	13:0	13:0	1	453.286	C21 H44 O7 N1 P1	15.686	+H	30.481	28.59	0	B	183200	5585000	28140	804500
							LPC(14:0)	LPC	14:0	14:0	2	467.301	C22 H46 O7 N1 P1	2.148	+H	714.45	580.384	0.288	B	53720	38380000	9150	5311000
							LPC(14:0)	LPC	14:0	14:0	2	467.301	C22 H46 O7 N1 P1	16.972	+H	782.682	776.662	0	B	1893000	1481000000	321200	249400000
							LPC(14:0e)	LPC	14:0e	14:0e	1	453.322	C22 H48 O6 N1 P1	18.104	+H	40.945	39.392	0	B	250300	10250000	69800	2749000
							LPC(15:0)	LPC	15:0	15:0	1	481.317	C23 H48 O7 N1 P1	2.927	+H	428.766	363.501	0.027	B	58750	25190000	8938	3249000
							LPC(15:0)	LPC	15:0	15:0	1	481.317	C23 H48 O7 N1 P1	2.601	+H	277.744	421.28	0.028	B	11360	3156000	1072	451600
							LPC(15:1)	LPC	15:1	15:1	1	479.301	C23 H46 O7 N1 P1	4.687	+H	2941.67	505.018	0.03	B	3087	9081000	1273	642700
							LPC(15:1)	LPC	15:1	15:1	1	479.301	C23 H46 O7 N1 P1	2.088	+H	6148.69	443.44	0.017	B	197.3	1213000	346.5	153700
							LPC(16:0)	LPC	16:0	16:0	1	495.332	C24 H50 O7 N1 P1	6.202	+H	195.152	64.632	0.159	B	2964	578500	1763	114000
							LPC(16:0)	LPC	16:0	16:0	1	495.332	C24 H50 O7 N1 P1	4.052	+H	269.88	231.368	0.024	B	6108000	1648000000	732300	169400000
							LPC(16:0)	LPC	16:0	16:0	2	495.332	C24 H50 O7 N1 P1	3.556	+H	213.288	299.081	0.035	B	721600	153900000	59110	17680000
							LPC(16:0e)	LPC	16:0e	16:0e	1	481.353	C24 H52 O6 N1 P1	4.883	+H	162.893	154.519	0.031	B	213000	34700000	19550	3021000
							LPC(16:0p)	LPC	16:0p	16:0p	1	479.338	C24 H50 O6 N1 P1	4.989	+H	27.109	32.792	0.04	B	383300	10390000	21340	699700
							LPC(16:1)	LPC	16:1	16:1	1	493.317	C24 H48 O7 N1 P1	3.02	+H	319.302	101.302	0.024	B	65210	20820000	15220	1542000
							LPC(16:1)	LPC	16:1	16:1	2	493.317	C24 H48 O7 N1 P1	2.661	+H	2762.05	1138.41	0.176	B	151600	418700000	23180	26390000
							LPC(16:1p)	LPC	16:1p	16:1p	1	477.322	C24 H48 O6 N1 P1	7.842	+H	2.76983e+06	582294	0	B	0	2770000	0	582300
							LPC(16:1p)	LPC	16:1p	16:1p	1	477.322	C24 H48 O6 N1 P1	7.024	+H	53.961	37.834	0.276	B	63800	3443000	18270	691100
							LPC(16:2)	LPC	16:2	16:2	1	491.301	C24 H46 O7 N1 P1	2.01	+H	8995.29	702.475	0.027	B	190.6	1715000	282.4	198400
							LPC(17:0)	LPC	17:0	17:0	1	509.348	C25 H52 O7 N1 P1	5.514	+H	19.304	16.553	0.063	B	1671000	32250000	179800	2976000
							LPC(17:0)	LPC	17:0	17:0	1	509.348	C25 H52 O7 N1 P1	4.931	+H	15.758	16.114	0.033	B	873600	13770000	61630	993200
							LPC(17:0)	LPC	17:0	17:0	1	509.348	C25 H52 O7 N1 P1	4.36	+H	11.492	13.531	0.01	B	171800	1974000	8303	112300
							LPC(17:1)	LPC	17:1	17:1	1	507.332	C25 H50 O7 N1 P1	3.793	+H	1053.17	321.653	0.023	B	7496	7895000	3067	986400
							LPC(17:1)	LPC	17:1	17:1	1	507.332	C25 H50 O7 N1 P1	3.51	+H	414.14	427.192	0.029	B	35200	14580000	3560	1521000
							LPC(17:1)	LPC	17:1	17:1	1	507.332	C25 H50 O7 N1 P1	3.114	+H	424.044	72.482	0	B	2303	976500	2146	155600
							LPC(17:3)	LPC	17:3	17:3	1	503.301	C25 H46 O7 N1 P1	2.926	+H	30.694	91.191	0.036	B	25450	781200	1200	109400
							LPC(18:0)	LPC	18:0	18:0	1	523.364	C26 H54 O7 N1 P1	6.956	+H	14.947	13.737	0.085	B	50570000	755900000	6908000	94900000
							LPC(18:0e)	LPC	18:0e	18:0e	1	509.385	C26 H56 O6 N1 P1	7.76	+H	20.842	19.934	0.097	B	314600	6556000	41070	818800
							LPC(18:0p)	LPC	18:0p	18:0p	1	507.369	C26 H54 O6 N1 P1	7.701	+H	41.773	18.361	0.073	B	64370	2689000	18150	333200
							LPC(18:0p)	LPC	18:0p	18:0p	1	507.369	C26 H54 O6 N1 P1	5.603	+H	136.816	83.24	0.036	B	64860	8874000	7285	606400
							LPC(18:1)	LPC	18:1	18:1	1	521.348	C26 H52 O7 N1 P1	4.774	+H	384.159	243.407	0.061	B	2664000	1023000000	236800	57650000
							LPC(18:1)	LPC	18:1	18:1	2	521.348	C26 H52 O7 N1 P1	4.257	+H	159.87	119.915	0.038	B	502700	80370000	36060	4324000
							LPC(18:2)	LPC	18:2	18:2	1	519.332	C26 H50 O7 N1 P1	3.251	+H	20.763	14.454	0.031	B	1220000	25320000	188900	2730000
							LPC(18:2p)	LPC	18:2p	18:2p	1	503.338	C26 H50 O6 N1 P1	4.797	+H	2447.91	158.42	0.146	B	836.2	2047000	935.4	148200
							LPC(18:3)	LPC	18:3	18:3	1	517.317	C26 H48 O7 N1 P1	4.056	+H	693.895	499.65	0.053	B	212000	147100000	27340	13660000
							LPC(18:3)	LPC	18:3	18:3	1	517.317	C26 H48 O7 N1 P1	3.557	+H	146.466	148.978	0.025	B	36420	5335000	4608	686500
							LPC(18:3)	LPC	18:3	18:3	1	517.317	C26 H48 O7 N1 P1	2.544	+H	284.707	500.849	0.104	B	25930	7383000	2717	1361000
							LPC(19:0)	LPC	19:0	19:0	1	537.379	C27 H56 O7 N1 P1	8.065	+H	11.961	13.386	0.075	B	360700	4315000	45900	614400
							LPC(19:1)	LPC	19:1	19:1	1	535.364	C27 H54 O7 N1 P1	6.109	+H	136.822	82.913	0.056	B	49360	6753000	6520	540600
							LPC(19:3)	LPC	19:3	19:3	1	531.332	C27 H50 O7 N1 P1	5.515	+H	26.667	15.563	0.043	B	40090	1069000	7345	114300
							LPC(19:3)	LPC	19:3	19:3	1	531.332	C27 H50 O7 N1 P1	3.44	+H	11918.8	594.658	0.026	B	203.4	2424000	569.7	338800
							LPC(20:0)	LPC	20:0	20:0	1	551.395	C28 H58 O7 N1 P1	9.021	+H	44.376	42.478	0.193	B	303100	13450000	47920	2035000
							LPC(20:0e)	LPC	20:0e	20:0e	1	537.416	C28 H60 O6 N1 P1	9.895	+H	61.958	56.983	0.032	B	43250	2680000	6350	361800
							LPC(20:0p)	LPC	20:0p	20:0p	1	535.4	C28 H58 O6 N1 P1	9.743	+H	1473.79	440.4	0	B	631.8	931200	350.7	154500
							LPC(19:0)	LPC	19:0	19:0	1	537.379	C27 H56 O7 N1 P1	20.831	+H	16.921	14.637	0	B	847700	14340000	222300	3253000
							LPC(19:1)	LPC	19:1	19:1	1	535.364	C27 H54 O7 N1 P1	19.972	+H	24.161	11.897	0	B	779900	18840000	195900	2331000
							LPC(19:2)	LPC	19:2	19:2	1	533.348	C27 H52 O7 N1 P1	19.572	+H	177.443	107.538	0	B	31780	5640000	12220	1314000
							LPC(19:2)	LPC	19:2	19:2	1	533.348	C27 H52 O7 N1 P1	19.27	+H	795.035	94.734	0.076	B	27970	22230000	12140	1150000
							LPC(19:3)	LPC	19:3	19:3	1	531.332	C27 H50 O7 N1 P1	19.805	+H	18.201	16.998	0	B	541000	9846000	151900	2583000
							LPC(19:3)	LPC	19:3	19:3	1	531.332	C27 H50 O7 N1 P1	18.556	+H	29.757	26.797	0	B	981700	29210000	267500	7168000
							LPC(20:0)	LPC	20:0	20:0	1	551.395	C28 H58 O7 N1 P1	21.326	+H	31.615	31.162	0	B	1275000	40300000	442800	13800000
							LPC(20:0e)	LPC	20:0e	20:0e	1	537.416	C28 H60 O6 N1 P1	21.703	+H	148.418	93.723	0	B	117300	17410000	66200	6204000
							LPC(20:0p)	LPC	20:0p	20:0p	1	535.4	C28 H58 O6 N1 P1	21.589	+H	103.315	95.423	0.115	B	70880	7323000	28910	2759000
							LPC(20:1)	LPC	20:1	20:1	1	549.379	C28 H56 O7 N1 P1	7.334	+H	671.225	733.995	0.047	B	157600	105800000	15300	11230000
							LPC(20:1)	LPC	20:1	20:1	1	549.379	C28 H56 O7 N1 P1	6.894	+H	65.286	34.716	0.005	B	108000	7050000	18450	640500
							LPC(20:1)	LPC	20:1	20:1	1	549.379	C28 H56 O7 N1 P1	2.669	+H	4222.64	253.995	0.124	B	3284	13870000	1277	324300
							LPC(20:2)	LPC	20:2	20:2	1	547.364	C28 H54 O7 N1 P1	6.017	+H	47.621	30.132	0.137	B	235900	11240000	24890	750000
							LPC(20:2)	LPC	20:2	20:2	1	547.364	C28 H54 O7 N1 P1	5.6	+H	239.293	311.41	0.104	B	128000	30640000	7344	2287000
							LPC(20:2)	LPC	20:2	20:2	1	547.364	C28 H54 O7 N1 P1	5.07	+H	50.235	39.679	0.012	B	39730	1996000	4826	191500
							LPC(20:3)	LPC	20:3	20:3	1	545.348	C28 H52 O7 N1 P1	6.946	+H	33.869	31.753	0.178	B	2319000	78550000	276700	8786000
							LPC(20:3)	LPC	20:3	20:3	1	545.348	C28 H52 O7 N1 P1	4.669	+H	5665.87	1365.69	0.041	B	6616	37480000	3033	4142000
							LPC(20:3)	LPC	20:3	20:3	1	545.348	C28 H52 O7 N1 P1	4.182	+H	156.645	92.679	0.035	B	118900	18620000	16160	1498000
							LPC(20:3)	LPC	20:3	20:3	1	545.348	C28 H52 O7 N1 P1	3.784	+H	69.932	79.996	0.177	B	182800	12790000	21100	1688000
							LPC(20:4)	LPC	20:4	20:4	1	543.332	C28 H50 O7 N1 P1	4.787	+H	640.157	515.282	0.085	B	74400	47630000	9004	4640000
							LPC(20:4)	LPC	20:4	20:4	1	543.332	C28 H50 O7 N1 P1	3.465	+H	29.417	9.01	0.029	B	38510	1133000	16240	146300
							LPC(20:4)	LPC	20:4	20:4	1	543.332	C28 H50 O7 N1 P1	3.194	+H	58.197	54.206	0.025	B	165200	9613000	24980	1354000
							LPC(20:4)	LPC	20:4	20:4	1	543.332	C28 H50 O7 N1 P1	2.899	+H	36.433	35.828	0.018	B	54880	2000000	8932	320000
							LPC(20:5)	LPC	20:5	20:5	1	541.317	C28 H48 O7 N1 P1	2.333	+H	1172.62	152.042	0.019	B	616.3	722700	876.6	133300
							LPC(21:3)	LPC	21:3	21:3	1	559.364	C29 H54 O7 N1 P1	5.51	+H	2238.36	189.383	0.046	B	1165	2609000	1564	296200
							LPC(22:0)	LPC	22:0	22:0	1	579.426	C30 H62 O7 N1 P1	11.149	+H	85.096	75.812	0.015	B	46540	3960000	9854	747000
							LPC(22:1)	LPC	22:1	22:1	1	577.411	C30 H60 O7 N1 P1	9.232	+H	59.779	52.678	0.002	B	766900	45840000	168700	8886000
							LPC(22:1)	LPC	22:1	22:1	2	577.411	C30 H60 O7 N1 P1	8.85	+H	1442.37	829.036	0.004	B	4194	6050000	895.1	742100
							LPC(22:3)	LPC	22:3	22:3	1	573.379	C30 H56 O7 N1 P1	9.126	+H	1.90365e+06	263594	0	B	0	1904000	0	263600
							LPC(22:3)	LPC	22:3	22:3	1	573.379	C30 H56 O7 N1 P1	6.826	+H	7008.31	1408.97	0.086	B	2308	16170000	1241	1748000
							LPC(22:3)	LPC	22:3	22:3	1	573.379	C30 H56 O7 N1 P1	6.433	+H	751.871	586.774	0	B	3550	2670000	608	356800
							LPC(22:4)	LPC	22:4	22:4	1	571.364	C30 H54 O7 N1 P1	7.325	+H	74.912	100.373	0.078	B	122000	9139000	13810	1386000
							LPC(22:4)	LPC	22:4	22:4	1	571.364	C30 H54 O7 N1 P1	5.087	+H	29.641	17.461	0.1	B	48520	1438000	7070	123400
							LPC(22:5)	LPC	22:5	22:5	1	569.348	C30 H52 O7 N1 P1	3.677	+H	156.65	124.349	0.026	B	22490	3523000	3342	415600
							LPC(22:5)	LPC	22:5	22:5	1	569.348	C30 H52 O7 N1 P1	3.336	+H	718.135	120.901	0.034	B	2353	1690000	1663	201100
							LPC(22:6)	LPC	22:6	22:6	1	567.332	C30 H50 O7 N1 P1	4.666	+H	5411.44	459.3	0	B	353.7	1914000	539.6	247800
							LPC(22:6)	LPC	22:6	22:6	1	567.332	C30 H50 O7 N1 P1	3.105	+H	200.708	108.96	0.023	B	10460	2099000	2575	280600
							LPC(22:6)	LPC	22:6	22:6	1	567.332	C30 H50 O7 N1 P1	2.842	+H	597.051	131.724	0.025	B	3131	1869000	1988	261900
							LPC(24:0)	LPC	24:0	24:0	1	607.458	C32 H66 O7 N1 P1	13.37	+H	147.557	97.268	0.002	B	38540	5687000	9513	925300
							LPC(24:1)	LPC	24:1	24:1	1	605.442	C32 H64 O7 N1 P1	11.231	+H	2087.29	1449.5	0.01	B	9753	20360000	1908	2766000
							LPC(24:1)	LPC	24:1	24:1	1	605.442	C32 H64 O7 N1 P1	10.789	+H	1010.68	264.306	0	B	1438	1454000	959.1	253500
							LPC(24:2)	LPC	24:2	24:2	1	603.426	C32 H62 O7 N1 P1	9.677	+H	479.019	286.243	0.074	B	13020	6239000	3739	1070000
							LPC(24:2)	LPC	24:2	24:2	1	603.426	C32 H62 O7 N1 P1	9.289	+H	303.195	89.522	0	B	3733	1132000	2015	180400
							LPC(24:3)	LPC	24:3	24:3	1	601.411	C32 H60 O7 N1 P1	8.488	+H	10.994	43.207	0.058	B	310400	3412000	17000	734700
							LPC(24:4)	LPC	24:4	24:4	1	599.395	C32 H58 O7 N1 P1	9.222	+H	11120.8	3395.66	0.031	B	1605	17850000	1133	3847000
							LPC(24:6)	LPC	24:6	24:6	1	595.364	C32 H54 O7 N1 P1	6.838	+H	490.686	89.571	0.104	B	2405	1180000	1451	129900
							LPC(26:1)	LPC	26:1	26:1	1	633.473	C34 H68 O7 N1 P1	13.369	+H	2.75302e+06	331690	0	B	0	2753000	0	331700
							LPC(26:2)	LPC	26:2	26:2	1	631.458	C34 H66 O7 N1 P1	11.512	+H	661.409	159.062	0.01	B	4416	2921000	2816	447900
							LPC(26:4)	LPC	26:4	26:4	1	627.426	C34 H62 O7 N1 P1	11.239	+H	95.645	44.084	0.066	B	10980	1050000	3579	157800
							LPC(26:4)	LPC	26:4	26:4	1	627.426	C34 H62 O7 N1 P1	9.102	+H	243.244	116.563	0.061	B	4601	1119000	1644	191600
							LPC(34:2)	LPC	34:2	34:2	1	743.583	C42 H82 O7 N1 P1	23.912	+Na	37.274	24.908	0.001	B	282000	10510000	106900	2662000
							LPC(36:4)	LPC	36:4	36:4	1	767.583	C44 H82 O7 N1 P1	24.032	+H	37.493	41.611	0.001	B	620700	23270000	136900	5697000
							LPE(14:0)	LPE	14:0	14:0	1	425.254	C19 H40 O7 N1 P1	12.607	+H	2.81352e+06	430413	0	B	0	2814000	0	430400
							LPE(15:0)	LPE	15:0	15:0	1	439.27	C20 H42 O7 N1 P1	14.048	-H	1.633e+06	387887	0	B	0	1633000	0	387900
							LPE(16:0)	LPE	16:0	16:0	1	453.286	C21 H44 O7 N1 P1	3.96	+H	311.406	259.253	0.031	B	29850	9294000	4162	1079000
							LPE(16:1)	LPE	16:1	16:1	1	451.27	C21 H42 O7 N1 P1	2.491	-H	1109.22	237.215	0.001	B	1128	1251000	680.4	161400
							LPE(18:0)	LPE	18:0	18:0	1	481.317	C23 H48 O7 N1 P1	7.021	-H	807.361	729.746	0.001	B	22890	18480000	3637	2654000
							LPE(18:0)	LPE	18:0	18:0	1	481.317	C23 H48 O7 N1 P1	6.451	-H	5747.45	636.103	0.002	B	399.9	2299000	469.3	298500
							LPE(18:1)	LPE	18:1	18:1	1	479.301	C23 H46 O7 N1 P1	4.709	-H	1786.69	601.199	0.002	A	6331	11310000	1613	969800
							LPE(18:1)	LPE	18:1	18:1	1	479.301	C23 H46 O7 N1 P1	4.089	-H	11896.7	1298.51	0.004	B	203.1	2417000	169.2	219700
							LPE(16:0e)	LPE	16:0e	16:0e	1	439.306	C21 H46 O6 N1 P1	16.215	-H	420.603	487.396	0	B	67400	28350000	17870	8708000
							LPE(16:0p)	LPE	16:0p	16:0p	1	437.291	C21 H44 O6 N1 P1	16.017	-H	735.628	648.282	0	B	347400	255600000	119300	77350000
							LPE(16:1p)	LPE	16:1p	16:1p	1	435.275	C21 H42 O6 N1 P1	14.529	-H	2.24856e+06	497905	0	B	0	2249000	0	497900
							LPE(17:0)	LPE	17:0	17:0	1	467.301	C22 H46 O7 N1 P1	16.151	-H	205.375	175.645	0	A	50910	10450000	13920	2444000
							LPE(17:0)	LPE	17:0	17:0	1	467.301	C22 H46 O7 N1 P1	15.861	-H	30.273	8.298	0.002	B	188900	5718000	40050	332300
							LPE(17:1)	LPE	17:1	17:1	1	465.286	C22 H44 O7 N1 P1	14.954	-H	47.092	20.971	0.002	B	30860	1453000	10390	217900
							LPE(17:1)	LPE	17:1	17:1	1	465.286	C22 H44 O7 N1 P1	14.68	-H	56.462	35.391	0	B	30860	1743000	10390	367700
							LPE(18:0e)	LPE	18:0e	18:0e	1	467.338	C23 H50 O6 N1 P1	17.901	-H	7.65385e+06	2.56443e+06	0	B	0	7654000	0	2564000
							LPE(18:0p)	LPE	18:0p	18:0p	1	465.322	C23 H48 O6 N1 P1	16.638	-H	2.01516e+07	4.02034e+06	0	B	0	20150000	0	4020000
							LPE(18:1)	LPE	18:1	18:1	2	479.301	C23 H46 O7 N1 P1	15.722	+H	552.336	341.375	0	B	300500	166000000	69510	23730000
							LPE(18:1p)	LPE	18:1p	18:1p	1	463.306	C23 H46 O6 N1 P1	16.478	+Na	1.89626e+07	3.93135e+06	0	B	0	18960000	0	3931000
							LPE(18:2p)	LPE	18:2p	18:2p	1	461.291	C23 H44 O6 N1 P1	16.244	+H	3.48201e+06	1.13834e+06	0	B	0	3482000	0	1138000
							LPE(18:2)	LPE	18:2	18:2	1	477.286	C23 H44 O7 N1 P1	14.474	-H	22.07	13.256	0	B	113600	2508000	34470	456900
							LPE(20:1)	LPE	20:1	20:1	1	507.332	C25 H50 O7 N1 P1	17.353	-H	4.38198e+06	1.32339e+06	0	B	0	4382000	0	1323000
							LPE(20:2)	LPE	20:2	20:2	1	505.317	C25 H48 O7 N1 P1	16.321	-H	32.131	25.188	0	B	38000	1221000	11260	283500
							LPE(20:3)	LPE	20:3	20:3	1	503.301	C25 H46 O7 N1 P1	15.375	-H	12.354	19.687	0	A	117200	1448000	11640	229200
							LPE(22:3)	LPE	22:3	22:3	1	531.332	C27 H50 O7 N1 P1	17.094	-H	125.466	101.6	0	A	13640	1712000	5764	585600
							LPE(22:5)	LPE	22:5	22:5	1	527.301	C27 H46 O7 N1 P1	15.176	-H	1.38091e+06	333655	0	A	0	1381000	0	333700
							LPE(22:6)	LPE	22:6	22:6	1	525.285	C27 H44 O7 N1 P1	14.547	-H	1.7454e+06	367621	0	A	0	1745000	0	367600
							LPG(16:0)	LPG	16:0	16:0	1	484.28	C22 H45 O9 N0 P1	14.016	-H	97.91	66.842	0	B	96980	9495000	34000	2273000
							LPG(16:1)	LPG	16:1	16:1	1	482.264	C22 H43 O9 N0 P1	12.386	-H	2.50257e+06	478113	0.001	B	0	2503000	0	478100
							LPG(16:1)	LPG	16:1	16:1	1	482.264	C22 H43 O9 N0 P1	12.032	-H	43.569	28.44	0	B	117300	5110000	34580	983500
							LPG(16:2)	LPG	16:2	16:2	1	480.249	C22 H41 O9 N0 P1	10.878	-H	1.04417e+06	186213	0	B	0	1044000	0	186200
							LPG(18:0)	LPG	18:0	18:0	1	512.311	C24 H49 O9 N0 P1	15.896	-H	2.68659e+06	745501	0	B	0	2687000	0	745500
							LPG(18:1)	LPG	18:1	18:1	1	510.296	C24 H47 O9 N0 P1	2.94	-H	8493.61	320.013	0.002	B	190	1614000	422.3	135100
							LPG(18:2)	LPG	18:2	18:2	1	508.28	C24 H45 O9 N0 P1	13.295	-H	594.21	346.342	0.001	B	9001	5349000	3780	1309000
							LPG(20:1)	LPG	20:1	20:1	1	538.327	C26 H51 O9 N0 P1	16.243	-H	1.25031e+06	389816	0	B	0	1250000	0	389800
							LPG(20:2)	LPG	20:2	20:2	1	536.311	C26 H49 O9 N0 P1	15.195	-H	3.32429e+06	820397	0	B	0	3324000	0	820400
							LPG(20:3)	LPG	20:3	20:3	1	534.296	C26 H47 O9 N0 P1	14.544	-H	4277.04	2035.49	0	B	314.5	1345000	203.2	413600
							LPG(20:3)	LPG	20:3	20:3	1	534.296	C26 H47 O9 N0 P1	14.233	-H	227.419	166.596	0	B	15150	3446000	5657	942400
							LPG(20:4)	LPG	20:4	20:4	1	532.28	C26 H45 O9 N0 P1	14.573	-H	691.856	171.267	0	B	4772	3302000	1784	305600
							LPG(22:5)	LPG	22:5	22:5	1	558.296	C28 H47 O9 N0 P1	14.035	-H	1.05742e+06	276816	0	B	0	1057000	0	276800
							LPG(22:6)	LPG	22:6	22:6	1	556.28	C28 H45 O9 N0 P1	13.387	-H	2.03341e+06	517750	0	B	0	2033000	0	517800
							LPI(16:0)	LPI	16:0	16:0	1	572.296	C25 H49 O12 N0 P1	13.841	+H	40.429	17.774	0.006	B	64490	2607000	28000	497700
							LPI(18:0)	LPI	18:0	18:0	1	600.327	C27 H53 O12 N0 P1	15.375	-H	15.029	8.157	0.001	A	242700	3647000	42860	349600
							LPI(18:1)	LPI	18:1	18:1	1	598.312	C27 H51 O12 N0 P1	14.343	-H	32.408	19.058	0	A	229000	7422000	56550	1078000
							LPI(20:3)	LPI	20:3	20:3	1	622.312	C29 H51 O12 N0 P1	15.731	-H	808.685	431.889	0	B	1796	1452000	1274	550200
							LPI(20:3)	LPI	20:3	20:3	1	622.312	C29 H51 O12 N0 P1	14.367	-H	3.1332e+06	953866	0	A	0	3133000	0	953900
							LPI(20:4)	LPI	20:4	20:4	1	620.296	C29 H49 O12 N0 P1	13.05	-H	10.971	8.836	0.008	A	293400	3219000	65110	575300
							LPS(16:0)	LPS	16:0	16:0	1	497.275	C22 H44 O9 N1 P1	10.178	-H	1.41024e+07	2.406e+06	0	B	0	14100000	0	2406000
							LPS(16:1)	LPS	16:1	16:1	1	495.26	C22 H42 O9 N1 P1	7.396	-H	3.76092e+06	607253	0	B	0	3761000	0	607300
							LPS(16:1)	LPS	16:1	16:1	1	495.26	C22 H42 O9 N1 P1	6.916	-H	1.60545e+06	272908	0	B	0	1605000	0	272900
							LPS(18:0)	LPS	18:0	18:0	1	525.307	C24 H48 O9 N1 P1	13.608	-H	335.761	191.529	0	B	158500	53220000	57700	11050000
							LPS(18:0)	LPS	18:0	18:0	1	525.307	C24 H48 O9 N1 P1	13.153	-H	8.38953e+06	466996	0	B	0	8390000	0	467000
							LPS(18:1)	LPS	18:1	18:1	1	523.291	C24 H46 O9 N1 P1	11.231	-H	2.74738e+07	2.91433e+06	0	B	0	27470000	0	2914000
							LPS(18:1)	LPS	18:1	18:1	1	523.291	C24 H46 O9 N1 P1	10.691	-H	1.36614e+06	125003	0	B	0	1366000	0	125000
							LPS(18:2)	LPS	18:2	18:2	1	521.275	C24 H44 O9 N1 P1	8.811	-H	603.902	49.6	0	B	1718	1038000	2882	143000
							LPS(20:3)	LPS	20:3	20:3	1	547.291	C26 H46 O9 N1 P1	11.298	-H	487.701	81.061	0	B	3091	1507000	2988	242200
							LPS(20:4)	LPS	20:4	20:4	1	545.275	C26 H44 O9 N1 P1	11.24	-H	1.61038e+06	279476	0	D	0	1610000	0	279500
							LPS(20:4)	LPS	20:4	20:4	1	545.275	C26 H44 O9 N1 P1	8.922	-H	945309	163319	0	B	0	945300	0	163300
							LPS(22:3)	LPS	22:3	22:3	1	575.322	C28 H50 O9 N1 P1	13.759	-H	764245	224759	0	B	0	764200	0	224800
							LPS(22:5)	LPS	22:5	22:5	1	571.291	C28 H46 O9 N1 P1	10.364	-H	330.307	160.117	0	B	4880	1612000	1731	277200
							LPS(22:6)	LPS	22:6	22:6	1	569.275	C28 H44 O9 N1 P1	9.13	-H	3.0091e+06	435346	0	B	0	3009000	0	435300
							MG(31:3)	MG	31:3	31:3	1	534.465	C34 H62 O4	15.039	+NH4	1.7851e+06	255567	0	C	0	1785000	0	255600
							PA(16:0e)	PA	16:0e	16:0e	1	410.243	C19 H39 O7 N0 P1	9.162	+Na	307.75	121.863	0	C	17920	5515000	7950	968800
							PA(16:0p)	PA	16:0p	16:0p	1	408.228	C19 H37 O7 N0 P1	6.408	+Na	345.316	124.911	0	C	14130	4879000	6062	757200
							PA(16:0p)	PA	16:0p	16:0p	1	408.228	C19 H37 O7 N0 P1	5.931	+Na	4.40096e+06	658412	0	C	0	4401000	0	658400
							PA(18:0p)	PA	18:0p	18:0p	1	436.259	C21 H41 O7 N0 P1	10.295	+Na	785.376	273.182	0	C	4401	3457000	1890	516400
							PC(16:1/14:0)	PC	16:1/14:0	30:1	2	703.515	C38 H74 O8 N1 P1	14.69	+H	2.32765e+07	2.9217e+06	0.014	B	0	23280000	0	2922000
							PC(18:0/20:4)	PC	18:0/20:4	38:4	2	809.593	C46 H84 O8 N1 P1	18.487	+H	10.02	8.684	0.003	B	3687000	36940000	580400	5040000
							PC(21:1e)	PC	21:1e	21:1e	1	563.395	C29 H58 O7 N1 P1	8.286	+H	13.725	5.407	0.06	C	270300	3710000	93450	505300
							PC(21:1p)	PC	21:1p	21:1p	1	561.379	C29 H56 O7 N1 P1	20.495	+H	268.81	89.876	0	C	27540	7403000	26000	2337000
							PC(23:0p)	PC	23:0p	23:0p	1	591.426	C31 H62 O7 N1 P1	10.224	+H	1.26425e+06	177377	0	C	0	1264000	0	177400
							PC(25:0)	PC	25:0	25:0	1	635.453	C33 H66 O8 N1 P1	11.199	+H	13.679	17.992	0.341	C	62000	848200	8161	146800
							PC(25:0p)	PC	25:0p	25:0p	1	619.458	C33 H66 O7 N1 P1	12.278	+H	770371	112235	0	C	0	770400	0	112200
							PC(28:0)	PC	28:0	28:0	1	677.5	C36 H72 O8 N1 P1	14.068	+H	1.02446e+07	1.61778e+06	0	C	0	10240000	0	1618000
							PC(28:1)	PC	28:1	28:1	1	675.484	C36 H70 O8 N1 P1	13.069	+H	718.423	97.683	0.004	C	2118	1522000	2202	215100
							PC(29:0)	PC	29:0	29:0	1	691.515	C37 H74 O8 N1 P1	15.108	+H	3.39878e+06	547658	0	C	0	3399000	0	547700
							PC(30:0)	PC	30:0	30:0	2	705.531	C38 H76 O8 N1 P1	16.138	+H	229.941	200.335	0.003	C	197200	45350000	38910	7795000
							PC(30:0e)	PC	30:0e	30:0e	1	691.552	C38 H78 O7 N1 P1	17.339	+H	157.542	61.172	0.014	C	8546	1346000	3285	201000
							PC(30:1)	PC	30:1	30:1	1	703.515	C38 H74 O8 N1 P1	15.119	+H	198.122	80.831	0.017	C	32130	6366000	8140	658000
							PC(30:1)	PC	30:1	30:1	2	703.515	C38 H74 O8 N1 P1	14.354	+H	488.464	337.705	0.013	C	38080	18600000	6737	2275000
							PC(30:2)	PC	30:2	30:2	1	701.5	C38 H72 O8 N1 P1	13.788	+H	39.42	23.148	0.006	C	77460	3053000	13580	314400
							PC(30:2)	PC	30:2	30:2	1	701.5	C38 H72 O8 N1 P1	13.341	+H	21.032	19.076	0.007	C	58570	1232000	11730	223800
							PC(31:0)	PC	31:0	31:0	1	719.547	C39 H78 O8 N1 P1	17.154	+H	139.602	94.535	0.003	C	53830	7514000	12560	1187000
							PC(31:1)	PC	31:1	31:1	1	717.531	C39 H76 O8 N1 P1	16.137	+H	64.644	40.824	0.001	C	22540	1457000	4103	167500
							PC(31:1)	PC	31:1	31:1	1	717.531	C39 H76 O8 N1 P1	15.714	+H	130.037	56.697	0.012	C	127400	16560000	49400	2801000
							PC(31:1)	PC	31:1	31:1	1	717.531	C39 H76 O8 N1 P1	15.376	+H	4.76874e+06	550842	0.022	C	0	4769000	0	550800
							PC(31:2)	PC	31:2	31:2	1	715.515	C39 H74 O8 N1 P1	22.619	+H	396.425	80.339	0	C	97840	38790000	44840	3603000
							PC(32:0)	PC	32:0	32:0	2	733.562	C40 H80 O8 N1 P1	18.123	+H	25.591	29.538	0.006	C	2729000	69850000	371600	10980000
							PC(32:0e)	PC	32:0e	32:0e	1	719.583	C40 H82 O7 N1 P1	19.272	+H	54.137	40.782	0.004	C	88850	4810000	17210	702000
							PC(32:1)	PC	32:1	32:1	2	731.547	C40 H78 O8 N1 P1	16.726	+H	92.502	103.015	0.003	C	831200	76890000	77320	7965000
							PC(32:1)	PC	32:1	32:1	2	731.547	C40 H78 O8 N1 P1	16.398	+H	35.771	43.308	0.002	C	2264000	81000000	266100	11520000
							PC(32:1e)	PC	32:1e	32:1e	1	717.567	C40 H80 O7 N1 P1	17.906	+H	203.793	73.358	0.004	C	14920	3041000	4354	319400
							PC(32:1e)	PC	32:1e	32:1e	1	717.567	C40 H80 O7 N1 P1	17.58	+H	115.825	50.011	0.005	C	66400	7691000	17320	866200
							PC(32:1p)	PC	32:1p	32:1p	1	715.552	C40 H78 O7 N1 P1	23.373	+H	13.891	7.879	0	C	3785000	52580000	806000	6350000
							PC(32:1p)	PC	32:1p	32:1p	1	715.552	C40 H78 O7 N1 P1	23.061	+H	19.127	6.159	0	C	995900	19050000	363700	2240000
							PC(32:2)	PC	32:2	32:2	1	729.531	C40 H76 O8 N1 P1	15.713	+H	1.50553e+07	1.50773e+06	0.043	C	0	15060000	0	1508000
							PC(32:2)	PC	32:2	32:2	1	729.531	C40 H76 O8 N1 P1	15.236	+H	1.37022e+07	1.62263e+06	0.023	C	0	13700000	0	1623000
							PC(32:2)	PC	32:2	32:2	1	729.531	C40 H76 O8 N1 P1	14.954	+H	61.377	50.972	0.003	C	238200	14620000	43720	2229000
							PC(32:2)	PC	32:2	32:2	1	729.531	C40 H76 O8 N1 P1	14.646	+H	27.916	23.676	0.005	C	238200	6649000	43720	1035000
							PC(32:3)	PC	32:3	32:3	1	727.515	C40 H74 O8 N1 P1	14.041	+H	87.571	52.017	0.002	C	20400	1787000	6423	334100
							PC(32:3)	PC	32:3	32:3	1	727.515	C40 H74 O8 N1 P1	13.744	+H	30.428	13.202	0.105	C	62630	1906000	10670	140900
							PC(33:0)	PC	33:0	33:0	1	747.578	C41 H82 O8 N1 P1	18.75	+H	24.423	3.48	0.004	C	81560	1992000	45530	158400
							PC(33:0p)	PC	33:0p	33:0p	1	731.583	C41 H82 O7 N1 P1	18.492	+H	32.559	27.597	0.004	C	53610	1746000	5869	162000
							PC(33:1)	PC	33:1	33:1	1	745.562	C41 H80 O8 N1 P1	17.649	+H	30.524	35.354	0.005	C	320800	9791000	32250	1140000
							PC(33:1)	PC	33:1	33:1	1	745.562	C41 H80 O8 N1 P1	17.369	+H	22.295	16.471	0.006	C	600100	13380000	82080	1352000
							PC(33:2)	PC	33:2	33:2	1	743.547	C41 H78 O8 N1 P1	16.256	+H	29.641	18.666	0.005	C	78320	2322000	7833	146200
							PC(34:0)	PC	34:0	34:0	2	761.593	C42 H84 O8 N1 P1	24.175	+H	46.062	49.242	0.003	C	4151000	191200000	945700	46570000
							PC(34:0e)	PC	34:0e	34:0e	1	747.614	C42 H86 O7 N1 P1	21.061	+H	45.072	24.005	0	C	19040	858300	4976	119400
							PC(34:1)	PC	34:1	34:1	1	759.578	C42 H82 O8 N1 P1	21.399	+H	12.663	1.901	0.073	C	27530	348600	8919	16950
							PC(34:1)	PC	34:1	34:1	2	759.578	C42 H82 O8 N1 P1	18.324	+H	19.732	16.26	0.007	C	12990000	256300000	1685000	27400000
							PC(34:1e)	PC	34:1e	34:1e	1	745.598	C42 H84 O7 N1 P1	19.387	+H	22.264	25.616	0.003	C	824900	18370000	72110	1847000
							PC(34:2e)	PC	34:2e	34:2e	1	743.583	C42 H82 O7 N1 P1	23.906	+H	44.878	41.718	0.01	C	3890000	174600000	933000	38920000
							PC(34:4)	PC	34:4	34:4	1	753.531	C42 H76 O8 N1 P1	22.692	+H	62.755	33.26	0.013	C	460600	28900000	131900	4388000
							PC(35:1)	PC	35:1	35:1	1	773.593	C43 H84 O8 N1 P1	19.269	+H	17.785	16.605	0.004	C	639500	11370000	76740	1274000
							PC(35:1)	PC	35:1	35:1	1	773.593	C43 H84 O8 N1 P1	18.946	+H	10.987	6.27	0.003	C	304000	3340000	30630	192000
							PC(35:4)	PC	35:4	35:4	1	767.547	C43 H78 O8 N1 P1	23.342	+H	44.896	31.149	0	C	291000	13060000	127000	3955000
							PC(36:1)	PC	36:1	36:1	2	787.609	C44 H86 O8 N1 P1	20.158	+H	16.357	15.997	0.008	C	9230000	151000000	1171000	18730000
							PC(36:1e)	PC	36:1e	36:1e	1	773.63	C44 H88 O7 N1 P1	24.799	+H	37.623	22.819	0	C	386900	14560000	106500	2430000
							PC(36:2e)	PC	36:2e	36:2e	1	771.614	C44 H86 O7 N1 P1	19.585	+H	12.785	10.445	0.002	C	132000	1688000	15820	165300
							PC(36:2p)	PC	36:2p	36:2p	1	769.598	C44 H84 O7 N1 P1	24.011	+H	13.281	13.383	0.008	C	4033000	53560000	419000	5607000
							PC(36:3)	PC	36:3	36:3	1	783.578	C44 H82 O8 N1 P1	17.972	+H	18.687	22.328	0.003	C	320100	5982000	46980	1049000
							PC(36:4e)	PC	36:4e	36:4e	1	767.583	C44 H82 O7 N1 P1	23.905	+H	37.493	41.611	0.012	C	620700	23270000	136900	5697000
							PC(36:5)	PC	36:5	36:5	1	779.547	C44 H78 O8 N1 P1	15.252	+H	12.088	4.416	0.005	C	79110	956300	30390	134200
							PC(37:1)	PC	37:1	37:1	1	801.625	C45 H88 O8 N1 P1	21	+H	350.262	68.84	0.009	C	9164	3210000	3755	258500
							PC(37:2)	PC	37:2	37:2	1	799.609	C45 H86 O8 N1 P1	19.34	+H	39.904	27.087	0.005	C	51950	2073000	6369	172500
							PC(37:3)	PC	37:3	37:3	1	797.593	C45 H84 O8 N1 P1	23.713	+H	77.778	39.922	0.001	C	534800	41600000	241200	9629000
							PC(37:5)	PC	37:5	37:5	1	793.562	C45 H80 O8 N1 P1	15.683	+H	11.447	5.888	0.056	C	122600	1404000	39370	231900
							PC(38:1)	PC	38:1	38:1	1	815.64	C46 H90 O8 N1 P1	21.661	+H	519.936	95.249	0	C	8282	4306000	3412	325000
							PC(38:2)	PC	38:2	38:2	1	813.625	C46 H88 O8 N1 P1	20.383	+H	29.169	23.808	0.004	C	153100	4467000	18950	451100
							PC(38:3)	PC	38:3	38:3	1	811.609	C46 H86 O8 N1 P1	19.805	+H	133.083	49.46	0.002	C	69600	9262000	27570	1364000
							PC(38:3)	PC	38:3	38:3	1	811.609	C46 H86 O8 N1 P1	18.801	+H	151.835	13.732	0.001	C	23390	3552000	15200	208700
							PC(38:4)	PC	38:4	38:4	1	809.593	C46 H84 O8 N1 P1	20.156	+H	20.142	20.915	0.018	C	703400	14170000	102100	2135000
							PC(38:4)	PC	38:4	38:4	1	809.593	C46 H84 O8 N1 P1	18.035	+H	14.486	5.703	0.011	C	1080000	15650000	74140	422900
							PC(38:4e)	PC	38:4e	38:4e	1	795.614	C46 H86 O7 N1 P1	24.177	+H	14.498	20.359	0.007	C	848000	12290000	180000	3665000
							PC(38:4p)	PC	38:4p	38:4p	1	793.598	C46 H84 O7 N1 P1	17.795	+H	27.191	12.904	0.004	C	85560	2326000	21680	279700
							PC(38:5)	PC	38:5	38:5	2	807.578	C46 H82 O8 N1 P1	16.655	+H	32.069	37.089	0.003	C	871100	27940000	101800	3776000
							PC(38:6)	PC	38:6	38:6	1	805.562	C46 H80 O8 N1 P1	16.041	+H	161.388	54.352	0.002	C	83810	13530000	37250	2025000
							PC(38:6e)	PC	38:6e	38:6e	1	791.583	C46 H82 O7 N1 P1	23.495	+H	50.097	35.198	0	C	1540000	77170000	735200	25880000
							PC(38:6p)	PC	38:6p	38:6p	1	789.567	C46 H80 O7 N1 P1	23.31	+H	32.651	67.622	0.001	C	1676000	54730000	263100	17790000
							PC(39:3)	PC	39:3	39:3	1	825.625	C47 H88 O8 N1 P1	20.209	+H	1.67479e+06	165318	0	C	0	1675000	0	165300
							PC(39:5)	PC	39:5	39:5	1	821.593	C47 H84 O8 N1 P1	17.62	+H	66.138	36.098	0.017	C	126300	8352000	48260	1742000
							PC(39:6)	PC	39:6	39:6	1	819.578	C47 H82 O8 N1 P1	23.36	+H	10.146	21.089	0	C	1644000	16680000	274200	5782000
							PC(40:3)	PC	40:3	40:3	1	839.64	C48 H90 O8 N1 P1	21.032	+H	126.631	72.173	0.001	C	7103	899500	1523	109900
							PC(40:4)	PC	40:4	40:4	1	837.625	C48 H88 O8 N1 P1	24.198	+H	10.86	5.217	0.008	C	5506000	59790000	1636000	8533000
							PC(40:5)	PC	40:5	40:5	1	835.609	C48 H86 O8 N1 P1	19.209	+H	10.879	10.937	0.005	C	99360	1081000	12110	132500
							PC(40:5)	PC	40:5	40:5	2	835.609	C48 H86 O8 N1 P1	18.553	+H	59.264	57.334	0.003	C	682800	40460000	110100	6310000
							PC(40:5e)	PC	40:5e	40:5e	1	821.63	C48 H88 O7 N1 P1	24.276	+H	1.37208e+07	4.3117e+06	0	C	0	13720000	0	4312000
							PC(40:6)	PC	40:6	40:6	2	833.593	C48 H84 O8 N1 P1	17.977	+H	215.105	171.529	0.003	C	176900	38060000	24770	4248000
							PC(40:6e)	PC	40:6e	40:6e	1	819.614	C48 H86 O7 N1 P1	24.113	+H	292.744	221.985	0	C	105900	31000000	28010	6218000
							PC(40:6p)	PC	40:6p	40:6p	1	817.598	C48 H84 O7 N1 P1	23.888	+H	40.788	113.711	0.006	C	878400	35830000	97150	11050000
							PC(40:7)	PC	40:7	40:7	1	831.578	C48 H82 O8 N1 P1	16.209	+H	102.569	27.117	0.003	C	42600	4369000	12310	333800
							PC(40:7p)	PC	40:7p	40:7p	1	815.583	C48 H82 O7 N1 P1	23.402	+H	16.427	14.39	0	C	1634000	26850000	519500	7475000
							PC(42:4p)	PC	42:4p	42:4p	1	849.661	C50 H92 O7 N1 P1	21.348	+H	114.356	45.878	0	C	9547	1092000	3461	158800
							PC(42:6)	PC	42:6	42:6	1	861.625	C50 H88 O8 N1 P1	23.934	+H	12.054	28.083	0.009	C	1113000	13410000	104100	2923000
							PC(42:6e)	PC	42:6e	42:6e	1	847.645	C50 H90 O7 N1 P1	20.826	+H	898940	139668	0	C	0	898900	0	139700
							PC(42:7e)	PC	42:7e	42:7e	1	845.63	C50 H88 O7 N1 P1	24.585	+H	385.637	249.647	0.011	C	35440	13670000	13740	3431000
							PE(16:0e)	PE	16:0e	16:0e	1	453.286	C21 H44 O7 N1 P1	3.963	+H	311.468	265.276	0.026	C	29840	9294000	4068	1079000
							PE(16:0e)	PE	16:0e	16:0e	1	453.286	C21 H44 O7 N1 P1	3.465	+H	59.21	58.061	0.019	C	16780	993500	2129	123600
							PE(16:0p)	PE	16:0p	16:0p	1	451.27	C21 H42 O7 N1 P1	13.533	+H	68.346	46.971	0	C	246900	16870000	55410	2603000
							PE(17:0e)	PE	17:0e	17:0e	1	467.301	C22 H46 O7 N1 P1	16.181	+H	15.293	50.287	0	C	761600	11650000	67140
							PE(18:0e)	PE	18:0e	18:0e	1	481.317	C23 H48 O7 N1 P1	7.018	+H	1396.6	573.121	0.074	C	21810	30460000	5365	3075000
							PE(18:0p)	PE	18:0p	18:0p	1	479.301	C23 H46 O7 N1 P1	16.718	+H	972.017	628.763	0	D	31110	30240000	6455	4059000
							PE(20:0p)	PE	20:0p	20:0p	1	507.332	C25 H50 O7 N1 P1	17.376	+H	4.66449e+06	1.25229e+06	0	C	0	4664000	0	1252000
							PE(24:1e)	PE	24:1e	24:1e	1	563.395	C29 H58 O7 N1 P1	7.902	+H	31.542	3.321	0.103	D	19530	616000	19150	63580
							PE(16:0/18:1)	PE	16:0/18:1	34:1	1	717.531	C39 H76 O8 N1 P1	21.623	-H	7.58766e+06	2.87719e+06	0	A	0	7588000	0	2877000
							PE(16:0p/18:1)	PE	16:0p/18:1	34:1p	1	701.536	C39 H76 O7 N1 P1	21.764	+H	305.159	334.778	0	A	137600	42000000	46850	15680000
							PE(18:0/18:0)	PE	18:0/18:0	36:0	1	747.578	C41 H82 O8 N1 P1	21.882	+Na	217.373	39.904	0.001	A	83200	18090000	105300	4202000
							PE(36:1)	PE	36:1	36:1	1	745.562	C41 H80 O8 N1 P1	21.923	+H	27.7	42.655	0	C	525400	14550000	105300	4491000
							PE(18:1p/18:1)	PE	18:1p/18:1	36:2p	1	727.552	C41 H78 O7 N1 P1	21.81	+H	1234.45	398.797	0	A	20510	25320000	18730	7470000
							PE(16:0p/20:3)	PE	16:0p/20:3	36:3p	1	725.536	C41 H76 O7 N1 P1	21.732	+H	1.67711e+07	5.49358e+06	0	A	0	16770000	0	5494000
							PE(16:0p/20:4)	PE	16:0p/20:4	36:4p	1	723.52	C41 H74 O7 N1 P1	21.534	-H	5730.48	3485	0	B	1833	10500000	1306	4553000
							PE(18:0/20:3)	PE	18:0/20:3	38:3	1	769.562	C43 H80 O8 N1 P1	21.895	+H	4217.6	1760.53	0.004	B	5089	21470000	2545	4481000
							PE(18:1p/20:3)	PE	18:1p/20:3	38:4p	1	751.552	C43 H78 O7 N1 P1	21.782	+H	3.30628e+07	1.00291e+07	0	A	0	33060000	0	10030000
							PE(16:0p/22:5)	PE	16:0p/22:5	38:5p	1	749.536	C43 H76 O7 N1 P1	21.591	-H	1.63498e+07	6.27933e+06	0	A	0	16350000	0	6279000
							PE(16:0p/22:6)	PE	16:0p/22:6	38:6p	1	747.52	C43 H74 O7 N1 P1	21.506	-H	8.75049e+06	3.60565e+06	0	A	0	8750000	0	3606000
							PE(18:0/18:1)	PE	18:0/18:1	36:1	1	745.562	C41 H80 O8 N1 P1	21.919	-H	7.89395e+06	3.02668e+06	0	B	0	7894000	0	3027000
							PE(18:0/20:3)	PE	18:0/20:3	38:3	1	769.562	C43 H80 O8 N1 P1	21.888	-H	6.19795e+06	1.84016e+06	0	B	0	6198000	0	1840000
							PE(16:0p/22:3)	PE	16:0p/22:3	38:3p	1	753.567	C43 H80 O7 N1 P1	21.956	+H	205.847	118.828	0	B	38970	8022000	24550	2918000
							PE(18:1/18:1)	PE	18:1/18:1	36:2	1	743.547	C41 H78 O8 N1 P1	21.681	-H	3117.47	1925.04	0	B	2678	8350000	1640	3158000
							PE(18:1p/20:3)	PE	18:1p/20:3	38:4p	1	751.552	C43 H78 O7 N1 P1	21.762	-H	5.62238e+06	2.00575e+06	0	B	0	5622000	0	2006000
							PE(18:1p/22:6)	PE	18:1p/22:6	40:7p	1	773.536	C45 H76 O7 N1 P1	21.563	-H	6.1309e+06	2.47456e+06	0	A	0	6131000	0	2475000
							PE(34:1p)	PE	34:1p	34:1p	1	701.536	C39 H76 O7 N1 P1	21.762	-H	1.62036e+07	6.94494e+06	0	C	0	16200000	0	17080
							PE(50:7)	PE	50:7	50:7	1	929.687	C55 H96 O8 N1 P1	31.118	+Na	30736.9	17083.8	0	D	0	30740	0	164800
							PG(43:1)	PG	43:1	43:1	1	874.666	C49 H95 O10 N0 P1	22.551	-H	1.26654e+06	164802	0	C	0	1267000	0	1645000
							PI(16:0/20:4)	PI	16:0/20:4	36:4	1	858.526	C45 H79 O13 N0 P1	20.793	-H	3.73983e+06	1.64481e+06	0	A	0	3740000	0	1517000
							PI(18:0/18:1)	PI	18:0/18:1	36:1	1	864.573	C45 H85 O13 N0 P1	21.39	-H	3.99265e+06	1.51685e+06	0	B	0	3993000	0	1585000
							PI(18:0/18:3)	PI	18:0/18:3	36:3	1	860.542	C45 H81 O13 N0 P1	21.043	-H	5.02229e+06	1.58451e+06	0	A	0	5022000	0	181800
							PI(18:0/20:3)	PI	18:0/20:3	38:3	1	888.573	C47 H85 O13 N0 P1	17.065	+NH4	997585	181774	0	B	0	997600	0	2020000
							PI(18:0/20:4)	PI	18:0/20:4	38:4	2	886.557	C47 H83 O13 N0 P1	15.726	+NH4	307.013	175.117	0	B	30720	9430000	11540	1667000
							PI(18:1/20:4)	PI	18:1/20:4	38:5	1	884.542	C47 H81 O13 N0 P1	20.883	-H	4.46767e+06	1.66695e+06	0	A	0	4468000	0	851800
							PS(26:4)	PS	26:4	26:4	1	643.348	C32 H54 O10 N1 P1	18.389	-H	3.73861e+06	851777	0	D	0	3739000	0	1484000
							PS(16:0/18:1)	PS	16:0/18:1	34:1	1	761.521	C40 H76 O10 N1 P1	20.655	-H	6.04858e+06	1.48427e+06	0	A	0	6049000	0	986700
							PS(35:0)	PS	35:0	35:0	1	777.552	C41 H80 O10 N1 P1	16.717	-H	201.504	260.058	0.008	C	44570	8982000	3794	4142000
							PS(18:0/18:1)	PS	18:0/18:1	36:1	1	789.552	C42 H80 O10 N1 P1	21.096	-H	1.44269e+07	4.14151e+06	0	A	0	14430000	0	499500
							PS(39:1)	PS	39:1	39:1	1	831.599	C45 H86 O10 N1 P1	18.486	-H	28.872	22.968	0.003	C	242700	7006000	21750	4691000
							SM(d32:2)	SM	d32:2	d32:2	1	672.521	C37 H73 O6 N2 P1	22.12	+H	11.868	16.967	0	C	1329000	15770000	321200	5450000
							SM(d34:1)	SM	d34:1	d34:1	1	702.568	C39 H79 O6 N2 P1	15.913	+HCOO	11.244	10.518	0.001	-	2559000	28770000	446000	356700
							SM(d34:2)	SM	d34:2	d34:2	1	700.552	C39 H77 O6 N2 P1	14.413	+H	13.416	4.357	0.042	C	553800	7429000	81870	411100
							SM(d34:3)	SM	d34:3	d34:3	1	698.536	C39 H75 O6 N2 P1	22.29	+H	30.574	22.728	0	C	387500	11850000	173800	3951000
							SM(d36:1)	SM	d36:1	d36:1	1	730.599	C41 H83 O6 N2 P1	18.015	+HCOO	14.057	12.206	0.001	C	190300	2674000	33680	5385000
							SM(d36:4)	SM	d36:4	d36:4	1	724.552	C41 H77 O6 N2 P1	15.921	+H	12.67	17.843	0.022	C	1978000	25060000	301800	1358000
							SM(d37:1)	SM	d37:1	d37:1	1	744.615	C42 H85 O6 N2 P1	23.779	+H	26.346	32.197	0.019	C	639800	16860000	157900	5085000
							SM(d38:0)	SM	d38:0	d38:0	1	760.646	C43 H89 O6 N2 P1	24.412	+H	38.444	35.638	0.001	C	813200	31260000	276000	9836000
							SM(d38:1)	SM	d38:1	d38:1	1	758.63	C43 H87 O6 N2 P1	19.965	+H	9.09202e+06	1.3583e+06	0	C	0	9092000	0	164100
							SM(d38:2)	SM	d38:2	d38:2	1	756.615	C43 H85 O6 N2 P1	18.328	+H	28.412	19.765	0.015	C	45910	1304000	8302	200500
							SM(d39:1)	SM	d39:1	d39:1	1	772.646	C44 H89 O6 N2 P1	24.482	+H	22.516	21.263	0.002	C	2107000	47440000	534400	11360000
							SM(d40:0)	SM	d40:0	d40:0	1	788.677	C45 H93 O6 N2 P1	22.287	+H	1.33593e+06	200481	0	C	0	1336000	0	2368000
							SM(d40:1)	SM	d40:1	d40:1	1	786.662	C45 H91 O6 N2 P1	21.709	+H	26.963	30.777	0.002	C	607500	16380000	76950	867000
							SM(d40:2)	SM	d40:2	d40:2	1	784.646	C45 H89 O6 N2 P1	20.23	+H	29.576	27.922	0.005	C	223000	6597000	31050	762600
							SM(d41:1)	SM	d41:1	d41:1	1	800.677	C46 H93 O6 N2 P1	25.341	+H	21.45	19.871	0.012	C	4993000	107100000	960600	19090000
							SM(d41:2)	SM	d41:2	d41:2	1	798.662	C46 H91 O6 N2 P1	20.778	+H	75.584	53.477	0.003	C	53710	4059000	14260	1685000
							SM(d41:3)	SM	d41:3	d41:3	1	796.646	C46 H89 O6 N2 P1	23.991	+H	93.285	111.551	0.048	C	288600	26920000	56000	6247000
							SM(d42:1)	SM	d42:1	d42:1	1	814.693	C47 H95 O6 N2 P1	23.246	+H	18.787	18.452	0.003	C	580800	10910000	91340	183800
							SM(d42:1)	SM	d42:1	d42:1	1	814.693	C47 H95 O6 N2 P1	22.218	+H	1.17909e+06	183792	0	C	0	1179000	0	760300
							SM(d42:2)	SM	d42:2	d42:2	1	812.677	C47 H93 O6 N2 P1	21.946	+H	18.732	16.575	0.005	C	288900	5411000	45870	5782000
							SM(d42:2)	SM	d42:2	d42:2	1	812.677	C47 H93 O6 N2 P1	21.612	+H	74.979	107.654	0.005	C	421100	31580000	53710	122500
							SM(d42:3)	SM	d42:3	d42:3	1	810.662	C47 H91 O6 N2 P1	20.606	+H	181.498	38.175	0.002	C	6353	1153000	3210	1946000
							SM(d42:3)	SM	d42:3	d42:3	1	810.662	C47 H91 O6 N2 P1	20.15	+H	41.105	45.881	0.004	C	314600	12930000	42410	320200
							SM(d42:4)	SM	d42:4	d42:4	1	808.646	C47 H89 O6 N2 P1	21.712	+H	79.703	26.114	0.002	C	27300	2176000	12260	242400
							SM(d42:5)	SM	d42:5	d42:5	1	806.63	C47 H87 O6 N2 P1	24.265	+H	40.471	24.311	0	C	282700	11440000	107400	2612000
							SM(d43:2)	SM	d43:2	d43:2	1	826.693	C48 H95 O6 N2 P1	25.417	+H	97.064	48.068	0.018	C	182600	17720000	72620	3491000
							SM(d43:5)	SM	d43:5	d43:5	1	820.646	C48 H89 O6 N2 P1	24.562	+H	111.152	77.978	0	C	73530	8174000	29240	2280000
							SM(d44:3)	SM	d44:3	d44:3	1	838.693	C49 H95 O6 N2 P1	25.18	+H	1.46788e+07	2.48815e+06	0	C	0	14680000	0	2488000
							SM(d44:4)	SM	d44:4	d44:4	1	836.677	C49 H93 O6 N2 P1	23.244	+H	20.49	12.496	0.003	C	83350	1708000	19400	808100
							SM(d44:5)	SM	d44:5	d44:5	1	834.662	C49 H91 O6 N2 P1	21.611	+H	176.3	86.987	0.025	C	24770	4368000	9290	382500
							SM(d44:6)	SM	d44:6	d44:6	1	832.646	C49 H89 O6 N2 P1	20.144	+H	189.973	94.656	0	C	11180	2124000	4041	161800
							TG(16:0/16:0/22:6)	TG	16:0/16:0/22:6	54:6	1	878.736	C57 H98 O6	27.999	+NH4	12.618	13.056	0.002	A	79300	1001000	12390	268400
							TG(16:0/18:1/22:4)	TG	16:0/18:1/22:4	56:5	1	908.783	C59 H104 O6	28.807	+NH4	20.055	8.86	0.028	A	242400	4861000	30290	651000
							TG(16:0/18:1/22:5)	TG	16:0/18:1/22:5	56:6	1	906.768	C59 H102 O6	28.246	+NH4	639.619	157.905	0.001	A	5150	3294000	4122	190600
							TG(18:0/18:1/22:5)	TG	18:0/18:1/22:5	58:6	1	934.799	C61 H106 O6	28.839	+NH4	1082.54	121.413	0	A	1112	1203000	1570	278000
							TG(56:7)	TG	56:7	56:7	1	904.752	C59 H100 O6	28.001	+NH4	243.304	75.613	0.003	C	5957	1449000	3677

## Sheet: 0082T CM
Lipids identified in the conditioned media of PSCs derived from human PDAC (0082T)
Filters used							LipidMolec	Class	FA	FA Group Key	Counts	Calc Mass	Formula	BaseRt	MainIon	ARatio[s1/c]	HRatio[s1/c]	APValue[s1]	MainGrade[s1]	MainArea[c]	MainArea[s1]	MainHeight[c]	MainHeight[s1]
Area ratio ≥ 10-fold fresh medium controls							Cer(d16:1)	Cer	d16:1	d16:1	1	285.23	C16 H31 O3 N1	11.358	-H	2951.23	1618.17	0	C	10740	31700000	4400	7119000
Retention time ≥ 2 min							Cer(d18:1)	Cer	d18:1	d18:1	1	313.262	C18 H35 O3 N1	14.505	-H	53.911	46.067	0	C	112400	6062000	36820	1696000
							Cer(d18:1/16:0)	Cer	d18:1/16:0	d34:1	1	537.512	C34 H67 O3 N1	18.434	+H	330.025	70.378	0	B	19600	6470000	8944	629400
							Cer(d18:1/17:0)	Cer	d18:1/17:0	d35:1	1	551.528	C35 H69 O3 N1	23.642	-H	122.277	91.337	0.001	A	48920	5982000	20230	1848000
MainGrade (level of lipid identification)							Cer(d18:1/18:0)	Cer	d18:1/18:0	d36:1	1	565.543	C36 H71 O3 N1	23.96	+H	6.51126e+06	1.84988e+06	0	B	0	6511000	0	1850000
A	Lipid class and FA were completely identified						Cer(d18:1/22:0)	Cer	d18:1/22:0	d40:1	1	621.606	C40 H79 O3 N1	25.633	+H	48.041	34.117	0.118	B	137800	6622000	48650	1660000
B	Lipid class and some FA were identified						Cer(d18:1/24:0)	Cer	d18:1/24:0	d42:1	1	649.637	C42 H83 O3 N1	24.928	+H	26.369	22.207	0	B	106400	2806000	17380	385900
C	Lipid class or FA were identified						Cer(d18:1/24:1)	Cer	d18:1/24:1	d42:2	1	647.622	C42 H81 O3 N1	23.501	+H	931.265	191.369	0	B	1541	1435000	895.5	171400
D	Lipid ID by other fragment ions (H2O loss etc.)						Cer(d18:2/16:0)	Cer	d18:2/16:0	d34:2	1	535.496	C34 H65 O3 N1	22.916	-H	4.6777e+06	1.59754e+06	0	A	0	4678000	0	1598000
							Cer(d20:1)	Cer	d20:1	d20:1	1	341.293	C20 H39 O3 N1	16.474	-H	15.811	18.636	0	C	338100	5345000	91740	1710000
							Cer(d20:2)	Cer	d20:2	d20:2	1	339.277	C20 H37 O3 N1	15.033	-H	28.991	22.796	0.14	C	144300	4183000	30080	685700
FA = fatty acid							CerG1(d18:1/24:0)	CerG1	d18:1/24:0	d42:1	1	811.69	C48 H93 O8 N1	25.702	+H	1.16051e+07	2.11814e+06	0	A	0	11610000	0	2118000
							CerG2(d30:1)	CerG2	d30:1	d30:1	1	805.555	C42 H79 O13 N1	22.87	-H	2.39295e+07	4.0841e+06	0	C	0	23930000	0	4084000
							CerG2(d34:1)	CerG2	d34:1	d34:1	1	861.618	C46 H87 O13 N1	23.915	-H	202.191	171.143	0.002	C	673500	136200000	181400	31050000
							CerG2(d18:1/16:0)	CerG2	d18:1/16:0	d34:1	1	861.618	C46 H87 O13 N1	22.759	+H	10.134	10.195	0	A	626000	6343000	203100	2071000
							CerG2(d18:1/24:0)	CerG2	d18:1/24:0	d42:1	1	973.743	C54 H103 O13 N1	25.323	+H	5.42297e+06	1.15457e+06	0	A	0	5423000	0	1155000
							CerG3(d18:1/16:0)	CerG3	d18:1/16:0	d34:1	1	1023.67	C52 H97 O18 N1	22.659	+H	119.271	84.81	0	A	85400	10190000	36090	3061000
							CerG3(d18:1/24:0)	CerG3	d18:1/24:0	d42:1	1	1135.8	C60 H113 O18 N1	25.11	+H	8.46997e+06	1.59567e+06	0	A	0	8470000	0	1596000
							CerP(d23:1)	CerP	d23:1	d23:1	1	463.306	C23 H46 O6 N1 P1	17.366	-H	1.88822e+07	4.39768e+06	0	D	0	18880000	0	4398000
							CerP(d32:1)	CerP	d32:1	d32:1	1	589.447	C32 H64 O6 N1 P1	22.548	-H	15.196	12.607	0	C	461000	7005000	168300	2122000
							cPA(16:0)	cPA	16:0	16:0	1	392.233	C19 H37 O6 N0 P1	15.5	-H	10.31	9.205	0	B	273500	2820000	88810	817500
							cPA(18:1)	cPA	18:1	18:1	1	418.248	C21 H39 O6 N0 P1	15.97	-H	44.734	29.283	0	B	99880	4468000	37120	1087000
							ChE(16:0)	ChE	16:0	16:0	1	624.585	C43 H76 O2	29.275	+NH4	1.60916e+06	339111	0	B	0	1609000	0	339100
							ChE(16:1)	ChE	16:1	16:1	1	622.569	C43 H74 O2	28.495	+NH4	168962	66836.9	0	B	4.645	784800	3.069	205100
							ChE(17:1)	ChE	17:1	17:1	1	636.585	C44 H76 O2	23.867	+NH4	104.355	79.315	0	B	816600	85210000	42210	3348000
							ChE(18:1)	ChE	18:1	18:1	1	650.6	C45 H78 O2	29.249	+NH4	1824.27	989.22	0.031	B	6421	11710000	2581	2553000
							ChE(18:2)	ChE	18:2	18:2	1	648.585	C45 H76 O2	28.595	+NH4	120.84	60.92	0	B	46920	5669000	16580	1010000
							ChE(20:4)	ChE	20:4	20:4	1	672.585	C47 H76 O2	28.186	+NH4	1.19528e+07	1.95194e+06	0	B	0	11950000	0	1952000
							ChE(20:5)	ChE	20:5	20:5	1	670.569	C47 H74 O2	27.509	+NH4	3.86883e+06	658840	0	B	0	3869000	0	658800
							ChE(22:5)	ChE	22:5	22:5	1	698.6	C49 H78 O2	28.214	+NH4	2.43335e+06	436658	0	B	0	2433000	0	436700
							ChE(22:6)	ChE	22:6	22:6	1	696.585	C49 H76 O2	27.801	+NH4	1.05214e+07	1.76362e+06	0	B	0	10520000	0	1764000
							DG(16:0/18:1)	DG	16:0/18:1	34:1	1	594.522	C37 H70 O5	24.863	+NH4	14.17	14.846	0	B	3718000	52690000	472600	7017000
							DG(16:1/18:1)	DG	16:1/18:1	34:2	1	592.507	C37 H68 O5	24.302	+NH4	11.444	12.01	0	B	1447000	16560000	156700	1882000
							DG(18:0/16:0)	DG	18:0/16:0	34:0	2	596.538	C37 H72 O5	25.634	+NH4	10.042	7.032	0.014	B	82380000	827300000	14200000	99870000
							DG(18:0/18:1)	DG	18:0/18:1	36:1	1	622.554	C39 H74 O5	25.791	+NH4	15.315	11.896	0.127	B	1509000	23100000	188600	2244000
							DG(18:1/20:4)	DG	18:1/20:4	38:5	1	642.522	C41 H70 O5	24.323	+NH4	2.49116e+06	972131	0	B	3.861	9618000	2.379	2313000
							DG(26:6/18:0)	DG	26:6/18:0	44:6	1	724.601	C47 H80 O5	21.114	+NH4	56.805	47.348	0.297	B	12270000	696900000	5323000	252100000
							DG(38:4)	DG	38:4	38:4	1	644.538	C41 H72 O5	21.672	+NH4	2.77486e+06	256301	0	C	0	2775000	0	256300
							FA(16:0)	FA	16:0	16:0	Manually confirmed
							FA(16:1)	FA	16:1	16:1	Manually confirmed
							FA(18:0)	FA	18:0	18:0	Manually confirmed
							FA(18:1)	FA	18:1	18:1	Manually confirmed
							FA(18:2)	FA	18:2	18:2	Manually confirmed
							FA(20:4)	FA	20:4	20:4	Manually confirmed
							FA(26:6)	FA	26:6	26:6	1	384.303	O2 H40 C26	17.058	-H	2916.82	3445.9	0.001	D	38380	112000000	10830	37310000
							LPA(14:0)	LPA	14:0	14:0	1	382.212	C17 H35 O7 N0 P1	17.001	-H	8.63891e+06	1.75153e+06	0	A	0	8639000	0	1752000
							LPA(15:0)	LPA	15:0	15:0	1	396.228	C18 H37 O7 N0 P1	18.07	-H	44.597	26.276	0	A	80600	3594000	31150	818500
							LPA(16:0)	LPA	16:0	16:0	1	410.243	C19 H39 O7 N0 P1	11.946	-H	45.648	32.149	0	A	39230	1791000	9606	308800
							LPA(16:1)	LPA	16:1	16:1	1	408.228	C19 H37 O7 N0 P1	8.734	-H	744989	155325	0	A	0	745000	0	155300
							LPA(16:1)	LPA	16:1	16:1	1	408.228	C19 H37 O7 N0 P1	9.029	-H	700346	98960.3	0	A	0	700300	0	98960
							LPA(18:1)	LPA	18:1	18:1	1	436.259	C21 H41 O7 N0 P1	12.896	-H	654.91	95.231	0	A	5908	3869000	5667	539700
							LPA(20:4)	LPA	20:4	20:4	1	458.243	C23 H39 O7 N0 P1	10.723	-H	1.25091e+06	224083	0	A	0	1251000	0	224100
							LPA(22:6)	LPA	22:6	22:6	1	482.243	C25 H39 O7 N0 P1	10.94	-H	875311	165393	0	A	0	875300	0	165400
							LPC(12:0e)	LPC	12:0e	12:0e	1	425.291	C20 H44 O6 N1 P1	15.68	+H	27541.8	11194.3	0.005	B	305.5	8414000	185.9	2081000
							LPC(14:0)	LPC	14:0	14:0	1	467.301	C22 H46 O7 N1 P1	2.217	+H	1317.1	211.514	0	B	1673	2204000	1488	314800
							LPC(14:0e)	LPC	14:0e	14:0e	1	453.322	C22 H48 O6 N1 P1	18.12	+H	23.813	16.878	0	B	172900	4117000	60290	1018000
							LPC(15:0)	LPC	15:0	15:0	1	481.317	C23 H48 O7 N1 P1	2.961	+H	126.494	91.905	0	B	10450	1322000	1157	106300
							LPC(16:0)	LPC	16:0	16:0	1	495.332	C24 H50 O7 N1 P1	4.05	+H	10.592	12.483	0	B	7470000	79120000	333400	4161000
							LPC(16:0)	LPC	16:0	16:0	1	495.332	C24 H50 O7 N1 P1	3.64	+H	11.202	12.443	0	B	1614000	18080000	76220	948400
							LPC(16:1)	LPC	16:1	16:1	1	493.317	C24 H48 O7 N1 P1	2.63	+H	1806.27	281.7	0	B	6770	12230000	2116	596200
							LPC(16:2)	LPC	16:2	16:2	1	491.301	C24 H46 O7 N1 P1	16.993	+H	327.059	106.402	0.011	B	80560	26350000	31080	3307000
							LPC(17:1)	LPC	17:1	17:1	1	507.332	C25 H50 O7 N1 P1	3.553	+H	529.626	66.84	0.002	B	4654	2465000	1754	117300
							LPC(18:0p)	LPC	18:0p	18:0p	1	507.369	C26 H54 O6 N1 P1	20.836	+H	29.881	26.214	0.002	B	1213000	36230000	410300	10760000
							LPC(18:1)	LPC	18:1	18:1	1	521.348	C26 H52 O7 N1 P1	19.408	+H	33.766	33.767	0	B	60540000	2044000000	12780000	431600000
							LPC(18:1p)	LPC	18:1p	18:1p	1	505.353	C26 H52 O6 N1 P1	19.97	+H	27.882	21.946	0.001	B	1076000	30010000	312500	6858000
							LPC(18:3)	LPC	18:3	18:3	1	517.317	C26 H48 O7 N1 P1	4.092	+H	16.598	10.559	0.001	B	276500	4589000	17460	184400
							LPC(20:0)	LPC	20:0	20:0	1	551.395	C28 H58 O7 N1 P1	21.325	+H	14.57	9.171	0	B	1147000	16710000	596700	5472000
							LPC(20:1)	LPC	20:1	20:1	1	549.379	C28 H56 O7 N1 P1	20.61	+H	19.488	17.581	0	B	2157000	42030000	662300	11640000
							LPC(20:2)	LPC	20:2	20:2	1	547.364	C28 H54 O7 N1 P1	19.879	+H	26.935	14.083	0.007	B	903700	24340000	246500	3471000
							LPC(20:3)	LPC	20:3	20:3	1	545.348	C28 H52 O7 N1 P1	19.36	+H	124.394	149.365	0	B	125400	15600000	36260	5415000
							LPC(20:4)	LPC	20:4	20:4	1	543.332	C28 H50 O7 N1 P1	4.71	+H	12.845	9.788	0	B	181800	2335000	10050	98390
							LPC(20:5)	LPC	20:5	20:5	1	541.317	C28 H48 O7 N1 P1	17.396	+H	66.785	55.269	0	B	298000	19900000	86030	4755000
							LPC(22:4)	LPC	22:4	22:4	1	571.364	C30 H54 O7 N1 P1	19.668	+H	25.865	22.696	0.008	B	813200	21030000	275300	6248000
							LPC(22:5)	LPC	22:5	22:5	1	569.348	C30 H52 O7 N1 P1	18.896	+H	65.441	64.666	0.004	B	1367000	89430000	326700	21120000
							LPC(22:6)	LPC	22:6	22:6	1	567.332	C30 H50 O7 N1 P1	18.381	+H	480.929	239.654	0.001	B	180100	86610000	68850	16500000
							LPC(24:0)	LPC	24:0	24:0	1	607.458	C32 H66 O7 N1 P1	13.465	+H	1515.17	70.399	0	B	1529	2317000	2154	151600
							LPC(24:1)	LPC	24:1	24:1	1	605.442	C32 H64 O7 N1 P1	22.036	+H	1.24239e+07	4.05356e+06	0	B	0	12420000	0	4054000
							LPC(26:0)	LPC	26:0	26:0	1	635.489	C34 H70 O7 N1 P1	15.753	+H	600.171	63.096	0	B	4310	2587000	3209	202500
							LPC(26:1)	LPC	26:1	26:1	1	633.473	C34 H68 O7 N1 P1	13.438	+H	1.73099e+06	111087	0	B	0	1731000	0	111100
							LPC(28:0)	LPC	28:0	28:0	1	663.52	C36 H74 O7 N1 P1	15.395	+H	3.5575e+06	258817	0	B	0	3558000	0	258800
							LPC(34:2)	LPC	34:2	34:2	1	743.583	C42 H82 O7 N1 P1	24.092	+Na	128.387	79.463	0	B	58870	7558000	22380	1779000
							LPE(16:0)	LPE	16:0	16:0	1	453.286	C21 H44 O7 N1 P1	16.16	-H	170.503	148.126	0.001	B	80410	13710000	21190	3139000
							LPE(16:0p)	LPE	16:0p	16:0p	1	437.291	C21 H44 O6 N1 P1	16.948	+Na	4.15937e+06	1.21436e+06	0	B	0	4159000	0	1214000
							LPE(18:0)	LPE	18:0	18:0	1	481.317	C23 H48 O7 N1 P1	7.062	-H	24.591	22.882	0	B	53360	1312000	8150	186500
							LPE(18:0p)	LPE	18:0p	18:0p	1	465.322	C23 H48 O6 N1 P1	18.535	-H	194.357	133.88	0	B	234800	45630000	106700	14280000
							LPE(18:1)	LPE	18:1	18:1	1	479.301	C23 H46 O7 N1 P1	16.295	-H	4.86933e+06	468171	0.009	B	0	4869000	0	468200
							LPE(20:4)	LPE	20:4	20:4	1	501.286	C25 H44 O7 N1 P1	15.5	-H	51.275	54.815	0	A	82790	4245000	17470	957600
							LPE(22:5)	LPE	22:5	22:5	1	527.301	C27 H46 O7 N1 P1	16.126	-H	2.40594e+06	588274	0	A	0	2406000	0	588300
							LPE(22:6)	LPE	22:6	22:6	1	525.285	C27 H44 O7 N1 P1	15.537	-H	3.05167e+06	686321	0	A	0	3052000	0	686300
							LPG(16:0)	LPG	16:0	16:0	1	484.28	C22 H45 O9 N0 P1	14.952	-H	1.55814e+06	480231	0	B	0	1558000	0	480200
							LPG(18:0)	LPG	18:0	18:0	1	512.311	C24 H49 O9 N0 P1	16.733	-H	1935.88	776.566	0	B	760.8	1473000	475.1	369000
							LPG(18:1)	LPG	18:1	18:1	1	510.296	C24 H47 O9 N0 P1	15.456	-H	119.513	54.62	0	B	67480	8065000	25800	1409000
							LPG(22:6)	LPG	22:6	22:6	1	556.28	C28 H45 O9 N0 P1	14.338	-H	4.87253e+06	1.17313e+06	0	B	0	4873000	0	1173000
							LPI(16:0)	LPI	16:0	16:0	1	572.296	C25 H49 O12 N0 P1	14.745	-H	112.443	77.435	0.001	A	94860	10670000	35330	2736000
							LPI(16:1)	LPI	16:1	16:1	1	570.28	C25 H47 O12 N0 P1	12.983	-H	1.26066e+06	268255	0	A	0	1261000	0	268300
							LPI(17:0)	LPI	17:0	17:0	1	586.312	C26 H51 O12 N0 P1	15.714	-H	62.937	41.539	0	A	50580	3183000	19900	826700
							LPI(18:0)	LPI	18:0	18:0	1	600.327	C27 H53 O12 N0 P1	16.589	-H	40.38	53.994	0	A	3601000	145400000	747800	40380000
							LPI(18:1)	LPI	18:1	18:1	1	598.312	C27 H51 O12 N0 P1	14.877	-H	4.92425e+06	219942	0	A	0	4924000	0	219900
							LPI(18:1)	LPI	18:1	18:1	1	598.312	C27 H51 O12 N0 P1	15.243	-H	852.769	438.756	0	A	25310	21580000	10590	4644000
							LPI(20:3)	LPI	20:3	20:3	1	622.312	C29 H51 O12 N0 P1	16.592	-H	6.92055e+06	2.12481e+06	0	A	0	6921000	0	2125000
							LPS(16:0)	LPS	16:0	16:0	1	497.275	C22 H44 O9 N1 P1	12.857	-H	560.503	224.786	0	B	12180	6825000	5509	1238000
							LPS(16:1)	LPS	16:1	16:1	1	495.26	C22 H42 O9 N1 P1	10.165	-H	1.24326e+06	231187	0	B	0	1243000	0	231200
							LPS(16:1)	LPS	16:1	16:1	1	495.26	C22 H42 O9 N1 P1	9.944	-H	1.00174e+06	152916	0	B	0	1002000	0	152900
							LPS(17:0)	LPS	17:0	17:0	1	511.291	C23 H46 O9 N1 P1	14.176	-H	1.60692e+06	377522	0	B	0	1607000	0	377500
							LPS(17:1)	LPS	17:1	17:1	1	509.275	C23 H44 O9 N1 P1	12.049	-H	778539	150212	0	B	0	778500	0	150200
							LPS(18:0)	LPS	18:0	18:0	1	525.307	C24 H48 O9 N1 P1	14.838	-H	1.0901e+07	574339	0.051	B	0	10900000	0	574300
							LPS(18:0)	LPS	18:0	18:0	1	525.307	C24 H48 O9 N1 P1	15.248	-H	90.808	75.119	0	B	511900	46480000	136000	10210000
							LPS(18:0p)	LPS	18:0p	18:0p	1	509.312	C24 H48 O8 N1 P1	16.003	-H	958893	266506	0	B	0	958900	0	266500
							LPS(18:1)	LPS	18:1	18:1	1	523.291	C24 H46 O9 N1 P1	13.197	-H	7.5179e+06	280009	0	B	0	7518000	0	280000
							LPS(18:1)	LPS	18:1	18:1	1	523.291	C24 H46 O9 N1 P1	13.617	-H	1187.8	468.741	0	B	28120	33400000	11870	5564000
							LPS(18:2)	LPS	18:2	18:2	1	521.275	C24 H44 O9 N1 P1	11.603	-H	196.797	28.795	0	B	7045	1386000	7133	205400
							LPS(20:3)	LPS	20:3	20:3	1	547.291	C26 H46 O9 N1 P1	13.103	-H	229.004	132.556	0.002	B	12700	2907000	4474	593100
							LPS(20:4)	LPS	20:4	20:4	1	545.275	C26 H44 O9 N1 P1	11.797	-H	2.14964e+06	371256	0	B	0	2150000	0	371300
							LPS(20:4)	LPS	20:4	20:4	1	545.275	C26 H44 O9 N1 P1	13.645	-H	1.91561e+06	313280	0	B	0	1916000	0	313300
							LPS(22:4)	LPS	22:4	22:4	1	573.307	C28 H48 O9 N1 P1	14.163	-H	2.75609e+06	654526	0	B	0	2756000	0	654500
							LPS(22:5)	LPS	22:5	22:5	1	571.291	C28 H46 O9 N1 P1	12.929	-H	4.7245e+06	1.07426e+06	0	D	0	4724000	0	1074000
							LPS(22:6)	LPS	22:6	22:6	1	569.275	C28 H44 O9 N1 P1	11.923	-H	5.41626e+06	887246	0	B	0	5416000	0	887200
							PA(41:5e)	PA	41:5e	41:5e	1	750.556	C44 H79 O7 N0 P1	22.546	-H	19.167	17.84	0	C	1517000	29090000	544400	9712000
							PA(42:4p)	PA	42:4p	42:4p	1	764.572	C45 H81 O7 N0 P1	23.066	-H	11.914	9.531	0	C	4615000	54980000	1633000	15570000
							PA(43:5e)	PA	43:5e	43:5e	1	778.588	C46 H83 O7 N0 P1	23.058	-H	13.276	11.508	0	C	21900000	290800000	6821000	78500000
							PA(43:6e)	PA	43:6e	43:6e	1	776.572	C46 H81 O7 N0 P1	22.662	-H	11.44	11.89	0	C	4060000	46450000	1220000	14510000
							PC(16:0/16:0)	PC	16:0/16:0	32:0	2	733.562	C40 H80 O8 N1 P1	18.263	+H	427.311	313.13	0	A	184500	78850000	20200	6326000
							PC(18:0/20:4)	PC	18:0/20:4	38:4	2	809.593	C46 H84 O8 N1 P1	18.587	+H	47.433	54.645	0	B	765300	36300000	58890	3218000
							PC(18:1/18:1)	PC	18:1/18:1	36:2	2	785.593	C44 H84 O8 N1 P1	23.919	+H	42.317	36.596	0.002	A	35230000	1491000000	8898000	325600000
							PC(28:0)	PC	28:0	28:0	1	677.5	C36 H72 O8 N1 P1	14.151	+H	7.02762e+06	570477	0	C	0	7028000	0	570500
							PC(29:0)	PC	29:0	29:0	1	691.515	C37 H74 O8 N1 P1	22.862	+H	86.897	216.696	0	C	267800	23270000	34700	7519000
							PC(30:0)	PC	30:0	30:0	2	705.531	C38 H76 O8 N1 P1	16.258	+H	1146.48	431.358	0	C	42450	48670000	9163	3952000
							PC(30:0e)	PC	30:0e	30:0e	1	691.552	C38 H78 O7 N1 P1	17.497	+H	978308	84501.3	0	C	0	978300	0	84500
							PC(30:1)	PC	30:1	30:1	1	703.515	C38 H74 O8 N1 P1	14.612	+H	143.946	58.737	0	C	167100	24060000	15510	911300
							PC(30:1e)	PC	30:1e	30:1e	1	689.536	C38 H76 O7 N1 P1	23.372	+H	62.831	61.049	0	C	272600	17130000	99210	6057000
							PC(30:2)	PC	30:2	30:2	1	701.5	C38 H72 O8 N1 P1	22.548	+H	2.18356e+07	2.64314e+06	0	C	0	21840000	0	2643000
							PC(31:0)	PC	31:0	31:0	1	719.547	C39 H78 O8 N1 P1	17.259	+H	696.864	85.597	0	C	12980	9043000	8315	711700
							PC(31:0)	PC	31:0	31:0	1	719.547	C39 H78 O8 N1 P1	16.919	+H	28.228	13.685	0	C	120500	3400000	15470	211800
							PC(31:1)	PC	31:1	31:1	1	717.531	C39 H76 O8 N1 P1	22.988	+H	1581.37	626.635	0.002	C	53160	84070000	27020	16930000
							PC(32:0)	PC	32:0	32:0	2	733.562	C40 H80 O8 N1 P1	23.708	+H	606.61	624.403	0	C	1532000	929200000	379200	236800000
							PC(32:0e)	PC	32:0e	32:0e	1	719.583	C40 H82 O7 N1 P1	19.465	+H	2.70443e+06	199565	0	C	0	2704000	0	199600
							PC(32:1)	PC	32:1	32:1	2	731.547	C40 H78 O8 N1 P1	16.495	+H	329.693	253.662	0	C	549700	181200000	30100	7636000
							PC(32:1e)	PC	32:1e	32:1e	1	717.567	C40 H80 O7 N1 P1	19.136	+H	4.09974e+06	311770	0	C	0	4100000	0	311800
							PC(32:1p)	PC	32:1p	32:1p	1	715.552	C40 H78 O7 N1 P1	23.512	+H	35.444	28.909	0	C	1198000	42450000	248900	7195000
							PC(32:2)	PC	32:2	32:2	1	729.531	C40 H76 O8 N1 P1	15.811	+H	730.957	97.097	0	C	15870	11600000	6336	615200
							PC(32:2)	PC	32:2	32:2	1	729.531	C40 H76 O8 N1 P1	14.935	+H	438.505	63.062	0	C	45540	19970000	9181	579000
							PC(32:3)	PC	32:3	32:3	1	727.515	C40 H74 O8 N1 P1	16.264	+H	25.844	14.934	0	C	125600	3246000	17640	263500
							PC(33:0)	PC	33:0	33:0	1	747.578	C41 H82 O8 N1 P1	19.202	+H	4.78879e+06	358262	0	C	0	4789000	0	358300
							PC(33:0)	PC	33:0	33:0	1	747.578	C41 H82 O8 N1 P1	18.797	+H	5.98735e+06	308706	0	C	0	5987000	0	308700
							PC(33:1)	PC	33:1	33:1	1	745.562	C41 H80 O8 N1 P1	17.487	+H	124.104	120.415	0	C	341000	42320000	21730	2616000
							PC(33:2)	PC	33:2	33:2	1	743.547	C41 H78 O8 N1 P1	18.982	+H	6.5969e+06	435679	0	C	0	6597000	0	435700
							PC(33:2)	PC	33:2	33:2	1	743.547	C41 H78 O8 N1 P1	15.769	+H	32.258	14.033	0.001	C	255000	8226000	22870	321000
							PC(34:0)	PC	34:0	34:0	2	761.593	C42 H84 O8 N1 P1	20.127	+H	612.228	183.016	0	C	32250	19740000	10360	1896000
							PC(34:0e)	PC	34:0e	34:0e	1	747.614	C42 H86 O7 N1 P1	24.896	+H	94.424	51.594	0	C	172000	16240000	52150	2690000
							PC(34:1)	PC	34:1	34:1	2	759.578	C42 H82 O8 N1 P1	18.435	+H	240.917	245.068	0	C	2140000	515500000	164800	40400000
							PC(34:1e)	PC	34:1e	34:1e	1	745.598	C42 H84 O7 N1 P1	19.6	+H	373.445	78.043	0	C	26130	9758000	7781	607300
							PC(34:2)	PC	34:2	34:2	2	757.562	C42 H80 O8 N1 P1	16.925	+H	12.868	6.406	0	C	7604000	97850000	653100	4184000
							PC(34:2e)	PC	34:2e	34:2e	1	743.583	C42 H82 O7 N1 P1	19.281	+H	107.439	44.521	0	C	78960	8483000	14200	632400
							PC(34:3)	PC	34:3	34:3	1	755.547	C42 H78 O8 N1 P1	18.24	+H	1941.56	155.614	0	C	2911	5652000	2788	433900
							PC(34:3)	PC	34:3	34:3	1	755.547	C42 H78 O8 N1 P1	15.788	+H	55.721	25.234	0.005	C	179000	9971000	12770	322200
							PC(34:3)	PC	34:3	34:3	1	755.547	C42 H78 O8 N1 P1	15.388	+H	26.558	13.805	0.001	C	229200	6088000	25700	354700
							PC(34:4)	PC	34:4	34:4	1	753.531	C42 H76 O8 N1 P1	22.8	+H	837.375	394.636	0	C	25310	21190000	12510	4938000
							PC(35:1)	PC	35:1	35:1	1	773.593	C43 H84 O8 N1 P1	19.39	+H	175.905	83.005	0	C	169900	29880000	20520	1703000
							PC(35:1)	PC	35:1	35:1	1	773.593	C43 H84 O8 N1 P1	19.023	+H	477.07	169.094	0	C	18730	8938000	4256	719600
							PC(35:1p)	PC	35:1p	35:1p	1	757.598	C43 H84 O7 N1 P1	24.319	+H	132.551	62.391	0.006	C	60880	8070000	23970	1495000
							PC(35:2)	PC	35:2	35:2	1	771.578	C43 H82 O8 N1 P1	17.93	+H	32.252	16.711	0.093	C	453800	14630000	42870	716400
							PC(35:2)	PC	35:2	35:2	1	771.578	C43 H82 O8 N1 P1	17.671	+H	49.242	46.817	0.001	C	269200	13260000	16510	773100
							PC(35:3)	PC	35:3	35:3	1	769.562	C43 H80 O8 N1 P1	19.685	+H	334.838	66.227	0	C	3764	1260000	2132	141200
							PC(36:0)	PC	36:0	36:0	1	789.625	C44 H88 O8 N1 P1	25.197	+H	1.17233e+07	1.71557e+06	0.011	C	0	11720000	0	1716000
							PC(36:1)	PC	36:1	36:1	2	787.609	C44 H86 O8 N1 P1	20.272	+H	130.314	109.348	0	C	1170000	152500000	112200	12270000
							PC(36:1e)	PC	36:1e	36:1e	1	773.63	C44 H88 O7 N1 P1	25.028	+H	265.605	125.302	0	C	45030	11960000	16220	2032000
							PC(36:2)	PC	36:2	36:2	1	785.593	C44 H84 O8 N1 P1	18.86	+H	25.196	14.358	0.05	C	5535000	139500000	532000	7638000
							PC(36:2)	PC	36:2	36:2	2	785.593	C44 H84 O8 N1 P1	18.597	+H	20.657	14.433	0	C	6791000	140300000	527300	7610000
							PC(36:2e)	PC	36:2e	36:2e	1	771.614	C44 H86 O7 N1 P1	24.845	+H	323.877	161.4	0	C	51870	16800000	18090	2919000
							PC(36:2p)	PC	36:2p	36:2p	1	769.598	C44 H84 O7 N1 P1	24.208	+H	19.518	44.084	0	C	1304000	25460000	109400	4821000
							PC(36:3)	PC	36:3	36:3	1	783.578	C44 H82 O8 N1 P1	18.047	+H	28.634	10.851	0.007	C	147800	4233000	16840	182700
							PC(36:3)	PC	36:3	36:3	1	783.578	C44 H82 O8 N1 P1	17.442	+H	15.421	10.033	0.005	C	1706000	26310000	102300	1026000
							PC(36:4)	PC	36:4	36:4	1	781.562	C44 H80 O8 N1 P1	18.423	+H	455.025	279.279	0	C	89360	40660000	13580	3793000
							PC(36:4)	PC	36:4	36:4	1	781.562	C44 H80 O8 N1 P1	16.621	+H	27.795	33.501	0	C	774400	21520000	56030	1877000
							PC(36:4)	PC	36:4	36:4	1	781.562	C44 H80 O8 N1 P1	15.887	+H	13.383	3.138	0.153	C	590000	7897000	43840	137600
							PC(36:4e)	PC	36:4e	36:4e	1	767.583	C44 H82 O7 N1 P1	17.829	+H	37.297	11.621	0	C	44870	1673000	10170	118200
							PC(36:4p)	PC	36:4p	36:4p	1	765.567	C44 H80 O7 N1 P1	17.445	+H	38.703	19.012	0	C	101600	3931000	19130	363700
							PC(36:5)	PC	36:5	36:5	1	779.547	C44 H78 O8 N1 P1	16.883	+H	14.548	5.497	0.001	C	447200	6505000	49060	269700
							PC(36:5)	PC	36:5	36:5	1	779.547	C44 H78 O8 N1 P1	15.308	+H	196.473	45.692	0.003	C	36530	7177000	7437	339800
							PC(36:5p)	PC	36:5p	36:5p	1	763.552	C44 H78 O7 N1 P1	23.222	+H	50.815	50.323	0	C	247500	12570000	90640	4561000
							PC(37:1)	PC	37:1	37:1	1	801.625	C45 H88 O8 N1 P1	21.124	+H	3.49689e+06	201617	0	C	0	3497000	0	201600
							PC(37:2)	PC	37:2	37:2	1	799.609	C45 H86 O8 N1 P1	19.455	+H	11.264	4.433	0.001	C	414300	4666000	51500	228300
							PC(37:3)	PC	37:3	37:3	1	797.593	C45 H84 O8 N1 P1	23.884	+H	536.938	335.338	0	C	42620	22890000	17550	5885000
							PC(37:4)	PC	37:4	37:4	1	795.578	C45 H82 O8 N1 P1	19.355	+H	450.614	107.754	0.002	C	5578	2513000	1167	125800
							PC(37:4)	PC	37:4	37:4	1	795.578	C45 H82 O8 N1 P1	17.63	+H	53.025	17.281	0	C	35760	1896000	8366	144600
							PC(37:5)	PC	37:5	37:5	1	793.562	C45 H80 O8 N1 P1	23.158	+H	1.03797e+07	2.43107e+06	0	C	0	10380000	0	2431000
							PC(37:7p)	PC	37:7p	37:7p	1	773.536	C45 H76 O7 N1 P1	19.78	+H	1.24398e+06	136084	0	C	0	1244000	0	136100
							PC(38:2)	PC	38:2	38:2	1	813.625	C46 H88 O8 N1 P1	20.292	+H	2845.7	142.453	0	C	3466	9862000	3648	519600
							PC(38:3)	PC	38:3	38:3	1	811.609	C46 H86 O8 N1 P1	19.919	+H	868.814	130.411	0	C	6808	5915000	3510	457800
							PC(38:3)	PC	38:3	38:3	2	811.609	C46 H86 O8 N1 P1	19.359	+H	28.92	32.074	0	C	746700	21600000	56340	1807000
							PC(38:3)	PC	38:3	38:3	1	811.609	C46 H86 O8 N1 P1	18.873	+H	222.58	65.264	0	C	27170	6048000	4012	261800
							PC(38:4)	PC	38:4	38:4	1	809.593	C46 H84 O8 N1 P1	20.274	+H	284.051	88.663	0	C	40440	11490000	10720	950500
							PC(38:4)	PC	38:4	38:4	1	809.593	C46 H84 O8 N1 P1	18.015	+H	42.167	39.78	0	C	199800	8423000	8951	356100
							PC(38:4)	PC	38:4	38:4	1	809.593	C46 H84 O8 N1 P1	17.631	+H	417.89	284.793	0	C	18230	7619000	1303	371100
							PC(38:4e)	PC	38:4e	38:4e	1	795.614	C46 H86 O7 N1 P1	24.367	+H	76.985	62.905	0	C	173600	13360000	64440	4054000
							PC(38:4p)	PC	38:4p	38:4p	1	793.598	C46 H84 O7 N1 P1	19.349	+H	345.134	110.853	0.001	C	4133	1427000	1079	119600
							PC(38:4p)	PC	38:4p	38:4p	1	793.598	C46 H84 O7 N1 P1	17.924	+H	841.276	49.057	0	C	2922	2458000	3498	171600
							PC(38:5)	PC	38:5	38:5	1	807.578	C46 H82 O8 N1 P1	18.59	+H	40.796	18.846	0.008	C	276200	11270000	31710	597600
							PC(38:5)	PC	38:5	38:5	1	807.578	C46 H82 O8 N1 P1	17.331	+H	56.899	57.616	0	C	120300	6843000	6761	389500
							PC(38:5)	PC	38:5	38:5	1	807.578	C46 H82 O8 N1 P1	16.758	+H	113.423	133.284	0	C	245600	27860000	17380	2317000
							PC(38:6)	PC	38:6	38:6	1	805.562	C46 H80 O8 N1 P1	16.097	+H	473.845	197.555	0	C	31320	14840000	4978	983400
							PC(38:6)	PC	38:6	38:6	1	805.562	C46 H80 O8 N1 P1	15.535	+H	47.722	25.774	0	C	86050	4106000	5577	143700
							PC(38:6e)	PC	38:6e	38:6e	1	791.583	C46 H82 O7 N1 P1	17.557	+H	142.492	39.467	0	C	28550	4069000	7895	311600
							PC(38:6p)	PC	38:6p	38:6p	1	789.567	C46 H80 O7 N1 P1	16.9	+H	1131.61	96.529	0	C	2519	2850000	2606	251600
							PC(39:3)	PC	39:3	39:3	1	825.625	C47 H88 O8 N1 P1	24.601	+H	461.123	286.97	0	C	30980	14280000	9843	2825000
							PC(39:5)	PC	39:5	39:5	1	821.593	C47 H84 O8 N1 P1	17.706	+H	1.52553e+06	118074	0	C	0	1526000	0	118100
							PC(39:6)	PC	39:6	39:6	1	819.578	C47 H82 O8 N1 P1	23.522	+H	24.932	22.596	0	C	517100	12890000	189200	4275000
							PC(40:2)	PC	40:2	40:2	1	841.656	C48 H92 O8 N1 P1	25.418	+H	1.19103e+07	1.38827e+06	0	C	0	11910000	0	1388000
							PC(40:3)	PC	40:3	40:3	1	839.64	C48 H90 O8 N1 P1	24.97	+H	2035.34	293.627	0	C	10990	22360000	4629	1359000
							PC(40:4)	PC	40:4	40:4	1	837.625	C48 H88 O8 N1 P1	19.878	+H	32.43	15.696	0	C	105500	3422000	19340	303600
							PC(40:5)	PC	40:5	40:5	2	835.609	C48 H86 O8 N1 P1	18.646	+H	151.119	109.293	0	C	166700	25190000	22200	2427000
							PC(40:5e)	PC	40:5e	40:5e	1	821.63	C48 H88 O7 N1 P1	24.468	+H	216.509	134.603	0	C	42840	9276000	15780	2125000
							PC(40:6)	PC	40:6	40:6	2	833.593	C48 H84 O8 N1 P1	18.086	+H	2118.72	760.159	0	C	11190	23710000	3232	2457000
							PC(40:6)	PC	40:6	40:6	1	833.593	C48 H84 O8 N1 P1	16.881	+H	6030.25	178.533	0.001	C	1157	6974000	2142	382400
							PC(40:6e)	PC	40:6e	40:6e	1	819.614	C48 H86 O7 N1 P1	24.31	+H	385.447	155.986	0.007	C	69730	26880000	24710	3854000
							PC(40:6p)	PC	40:6p	40:6p	1	817.598	C48 H84 O7 N1 P1	24.079	+H	2.03527e+07	5.79586e+06	0	C	0	20350000	0	5796000
							PC(40:7)	PC	40:7	40:7	1	831.578	C48 H82 O8 N1 P1	16.267	+H	88.728	47.487	0	C	74910	6647000	9522	452200
							PC(40:7p)	PC	40:7p	40:7p	1	815.583	C48 H82 O7 N1 P1	23.571	+H	13.635	13.081	0	C	1873000	25540000	508600	6653000
							PC(40:8)	PC	40:8	40:8	1	829.562	C48 H80 O8 N1 P1	23.425	+H	1.65989e+07	4.69983e+06	0	C	0	16600000	0	4700000
							PC(41:6)	PC	41:6	41:6	1	847.609	C49 H86 O8 N1 P1	24.127	+H	694.069	188.898	0	C	8114	5632000	7899	1492000
							PC(42:4p)	PC	42:4p	42:4p	1	849.661	C50 H92 O7 N1 P1	25.281	+H	192.045	157.291	0	C	31030	5959000	9216	1450000
							PC(42:6)	PC	42:6	42:6	1	861.625	C50 H88 O8 N1 P1	24.114	+H	1.37987e+07	2.70432e+06	0	C	0	13800000	0	2704000
							PC(42:6e)	PC	42:6e	42:6e	1	847.645	C50 H90 O7 N1 P1	25.016	+H	1.04456e+07	1.47821e+06	0	C	0	10450000	0	1478000
							PC(42:7e)	PC	42:7e	42:7e	1	845.63	C50 H88 O7 N1 P1	24.781	+H	573.353	111.108	0	C	12570	7210000	13520	1502000
							PE(18:0/18:1)	PE	18:0/18:1	36:1	2	745.562	C41 H80 O8 N1 P1	22.047	+Na	4.42281e+07	1.93051e+07	0	B	0	44230000	0	19310000
							PE(18:0/20:3)	PE	18:0/20:3	38:3	2	769.562	C43 H80 O8 N1 P1	22.04	+Na	49.643	63.464	0.001	B	342200	16990000	121900	7734000
							PE(18:1/18:1)	PE	18:1/18:1	36:2	1	743.547	C41 H78 O8 N1 P1	18.975	+H	6.88942e+06	435534	0	A	0	6889000	0	435500
							PE(18:1/18:1)	PE	18:1/18:1	36:2	1	743.547	C41 H78 O8 N1 P1	17.159	+Na	269.325	28.384	0	A	7706	2075000	5220	148200
							PE(18:1/20:3)	PE	18:1/20:3	38:4	1	767.547	C43 H78 O8 N1 P1	21.738	+Na	1.93508e+07	1.01405e+07	0	B	0	19350000	0	10140000
							PE(18:1/20:4)	PE	18:1/20:4	38:5	1	765.531	C43 H76 O8 N1 P1	21.772	+H	5.77505e+07	2.70847e+07	0	B	0	57750000	0	27080000
							PE(18:1/22:6)	PE	18:1/22:6	40:7	1	789.531	C45 H76 O8 N1 P1	21.745	+H	1.94669e+07	1.03061e+07	0	B	0	19470000	0	10310000
							PE(16:0p/18:1)	PE	16:0p/18:1	34:1p	1	701.536	C39 H76 O7 N1 P1	19.724	+H	91.47	23.802	0	B	29420	2691000	8736	207900
							PE(16:0p/20:4)	PE	16:0p/20:4	36:4p	1	723.52	C41 H74 O7 N1 P1	17.899	+H	5.48887e+06	442200	0	B	0	5489000	0	442200
							PE(16:0p/20:5)	PE	16:0p/20:5	36:5p	1	721.505	C41 H72 O7 N1 P1	21.666	+H	214.085	175.423	0.003	B	68740	14720000	32800	5754000
							PE(16:0p/22:6)	PE	16:0p/22:6	38:6p	1	747.52	C43 H74 O7 N1 P1	21.813	+H	3.65593e+07	1.35634e+07	0	B	0	36560000	0	13560000
							PE(18:0p/18:1)	PE	18:0p/18:1	36:1p	1	729.567	C41 H80 O7 N1 P1	22.447	+H	3.54736e+07	1.3493e+07	0	B	0	35470000	0	13490000
							PE(18:0p/20:4)	PE	18:0p/20:4	38:4p	1	751.552	C43 H78 O7 N1 P1	19.798	+H	27.33	30.272	0	B	187800	5132000	16630	503400
							PE(18:0p/20:4)	PE	18:0p/20:4	38:4p	2	751.552	C43 H78 O7 N1 P1	22.17	+H	224609	140667	0	A	322.5	72440000	207.9	29250000
							PE(18:0p/22:4)	PE	18:0p/22:4	40:4p	1	779.583	C45 H82 O7 N1 P1	22.438	+H	12319.2	8274.8	0	B	1690	20820000	1019	8432000
							PE(18:0p/22:5)	PE	18:0p/22:5	40:5p	1	777.567	C45 H80 O7 N1 P1	19.872	+H	61.716	23.304	0.003	B	35210	2173000	7196	167700
							PE(18:1p/20:4)	PE	18:1p/20:4	38:5p	1	749.536	C43 H76 O7 N1 P1	18.004	+H	87.366	50.7	0.007	B	50560	4417000	6259	317300
							PE(18:1p/22:5)	PE	18:1p/22:5	40:6p	1	775.552	C45 H78 O7 N1 P1	22.05	+H	1.1876e+07	4.68762e+06	0	B	0	11880000	0	4688000
							PE(18:1p/22:6)	PE	18:1p/22:6	40:7p	1	773.536	C45 H76 O7 N1 P1	21.873	+H	2.56832e+07	1.30455e+07	0	B	0	25680000	0	13050000
							PE(16:0e)	PE	16:0e	16:0e	1	453.286	C21 H44 O7 N1 P1	16.143	+H	349.719	217.911	0	C	45400	15880000	17160	3739000
							PE(18:0e)	PE	18:0e	18:0e	1	481.317	C23 H48 O7 N1 P1	17.881	+H	23.692	23.361	0	C	1986000	47060000	388300	9070000
							PE(18:0p)	PE	18:0p	18:0p	2	479.301	C23 H46 O7 N1 P1	16.633	+H	115.333	118.815	0.001	C	389300	44900000	72570	8623000
							PE(34:1)	PE	34:1	34:1	1	717.531	C39 H76 O8 N1 P1	18.829	+H	178.645	42.568	0	C	30060	5371000	9763	415600
							PE(38:6e)	PE	38:6e	38:6e	1	749.536	C43 H76 O7 N1 P1	18.004	+H	87.366	50.7	0.007	D	50560	4417000	6259	317300
							PE(34:0p)	PE	34:0p	34:0p	1	703.552	C39 H78 O7 N1 P1	22.454	+H	3.10077e+06	1.64763e+06	0	C	0	3101000	0	1648000
							PE(36:1)	PE	36:1	36:1	2	745.562	C41 H80 O8 N1 P1	20.633	+H	379.597	166.797	0	C	21870	8302000	4485	748000
							PE(37:0e)	PE	37:0e	37:0e	1	747.614	C42 H86 O7 N1 P1	24.896	+H	94.424	51.594	0	D	172000	16240000	52150	2690000
							PE(38:2)	PE	38:2	38:2	1	771.578	C43 H82 O8 N1 P1	22.101	+Na	2.04994e+07	8.30481e+06	0	C	0	20500000	0	8305000
							PE(38:3)	PE	38:3	38:3	1	769.562	C43 H80 O8 N1 P1	19.768	+H	271.407	66.418	0	C	5109	1387000	2117	140600
							PE(40:4)	PE	40:4	40:4	1	795.578	C45 H82 O8 N1 P1	22.286	+H	30.95	23.753	0.003	C	545800	16890000	283300	6729000
							PE(40:5)	PE	40:5	40:5	1	793.562	C45 H80 O8 N1 P1	22.094	+H	2.21764e+07	9.06793e+06	0	C	0	22180000	0	9068000
							PE(40:6)	PE	40:6	40:6	1	791.547	C45 H78 O8 N1 P1	18.525	+H	543.852	86.443	0.211	C	3353	1823000	1909	165000
							PE(40:7p)	PE	40:7p	40:7p	1	773.536	C45 H76 O7 N1 P1	22.169	+H	1.16379e+07	4.96681e+06	0	C	0	11640000	0	4967000
							PI(18:0/20:4)	PI	18:0/20:4	38:4	1	886.557	C47 H83 O13 N0 P1	21.454	+NH4	110.725	98.558	0	B	458600	50770000	189900	18720000
							PI(40:5)	PI	40:5	40:5	1	912.573	C49 H85 O13 N0 P1	21.517	+NH4	9.02945e+06	2.97242e+06	0	C	0	9029000	0	2972000
							PS(18:0/20:3)	PS	18:0/20:3	38:3	2	813.552	C44 H80 O10 N1 P1	21.321	+Na	1.85045e+07	4.68953e+06	0	B	0	18500000	0	4690000
							PS(18:0/20:4)	PS	18:0/20:4	38:4	1	811.536	C44 H78 O10 N1 P1	21.516	-H	7.15945e+06	1.6579e+06	0	B	0	7159000	0	1658000
							PS(18:0/22:6)	PS	18:0/22:6	40:6	1	835.536	C46 H78 O10 N1 P1	21.241	+H	1.85045e+07	4.53081e+06	0	B	0	18500000	0	4531000
							PS(33:3)	PS	33:3	33:3	1	743.474	C39 H70 O10 N1 P1	15.997	-H	1.133	1.026	0.026	C	6420000	7273000	596300	611700
							PS(34:1)	PS	34:1	34:1	1	761.521	C40 H76 O10 N1 P1	15.765	+H	3.65173e+06	202704	0	C	0	3652000	0	202700
							PS(36:1)	PS	36:1	36:1	1	789.552	C42 H80 O10 N1 P1	17.765	+H	7.62048e+06	212004	0	C	0	7620000	0	212000
							PS(38:3)	PS	38:3	38:3	1	813.552	C44 H80 O10 N1 P1	26.747	+Na	360.599	28.969	0	C	18710	6747000	7838	227000
							PS(40:4)	PS	40:4	40:4	1	839.568	C46 H82 O10 N1 P1	21.524	+H	1.03193e+07	4.05998e+06	0	C	0	10320000	0	4060000
							PS(40:5)	PS	40:5	40:5	1	837.552	C46 H80 O10 N1 P1	15.793	+H	2937.35	73.786	0	C	1432	4207000	2387	176100
							PS(40:6)	PS	40:6	40:6	1	835.536	C46 H78 O10 N1 P1	15.808	+H	4.46914e+06	204638	0	C	0	4469000	0	204600
							SM(d32:1)	SM	d32:1	d32:1	1	674.536	C37 H75 O6 N2 P1	13.761	+H	20.693	19.839	0	C	590700	12220000	36060	715400
							SM(d32:2)	SM	d32:2	d32:2	1	672.521	C37 H73 O6 N2 P1	22.168	+H	18.078	32.551	0	C	675200	12210000	130600	4252000
							SM(d34:1)	SM	d34:1	d34:1	1	702.568	C39 H79 O6 N2 P1	15.817	+H	27.056	38.148	0.003	C	6415000	173600000	369200	14090000
							SM(d34:2)	SM	d34:2	d34:2	1	700.552	C39 H77 O6 N2 P1	14.084	+H	11.494	15.888	0	C	1634000	18780000	68050	1081000
							SM(d34:4)	SM	d34:4	d34:4	1	696.521	C39 H73 O6 N2 P1	22.543	+H	13.696	11.095	0	C	1069000	14640000	388500	4311000
							SM(d35:1)	SM	d35:1	d35:1	1	716.583	C40 H81 O6 N2 P1	17.02	+H	18.031	14.203	0	C	301000	5427000	23670	336100
							SM(d36:1)	SM	d36:1	d36:1	1	730.599	C41 H83 O6 N2 P1	18.103	+H	23.487	24.23	0	C	495700	11640000	33160	803500
							SM(d36:2)	SM	d36:2	d36:2	1	728.583	C41 H81 O6 N2 P1	16.324	+H	10.356	7.216	0	C	489000	5064000	32150	232000
							SM(d36:4)	SM	d36:4	d36:4	1	724.552	C41 H77 O6 N2 P1	15.841	+H	24.335	21.091	0	C	647100	15750000	45880	967700
							SM(d36:5)	SM	d36:5	d36:5	1	722.536	C41 H75 O6 N2 P1	22.657	+H	12.693	11.909	0	C	2142000	27180000	733400	8734000
							SM(d37:1)	SM	d37:1	d37:1	1	744.615	C42 H85 O6 N2 P1	23.977	+H	11.415	12.189	0	C	648200	7399000	138500	1688000
							SM(d38:0)	SM	d38:0	d38:0	1	760.646	C43 H89 O6 N2 P1	24.62	+H	262.375	137.767	0	C	39340	10320000	16900	2328000
							SM(d38:1)	SM	d38:1	d38:1	1	758.63	C43 H87 O6 N2 P1	20.062	+H	2.98122e+06	206234	0	C	0	2981000	0	206200
							SM(d38:4)	SM	d38:4	d38:4	1	752.583	C43 H81 O6 N2 P1	23.64	+H	20.974	16.298	0	C	1053000	22090000	352900	5751000
							SM(d39:1)	SM	d39:1	d39:1	1	772.646	C44 H89 O6 N2 P1	20.965	+H	1.36074e+06	119409	0	C	0	1361000	0	119400
							SM(d40:0)	SM	d40:0	d40:0	1	788.677	C45 H93 O6 N2 P1	25.477	+H	426.123	284.485	0	C	26660	11360000	8236	2343000
							SM(d40:1)	SM	d40:1	d40:1	1	786.662	C45 H91 O6 N2 P1	21.793	+H	3199.59	264.025	0	C	3707	11860000	3384	893500
							SM(d40:2)	SM	d40:2	d40:2	1	784.646	C45 H89 O6 N2 P1	20.334	+H	6.57689e+06	236364	0	C	0	6577000	0	236400
							SM(d40:2)	SM	d40:2	d40:2	1	784.646	C45 H89 O6 N2 P1	20.03	+H	4.70934e+06	225655	0	C	0	4709000	0	225700
							SM(d41:1)	SM	d41:1	d41:1	1	800.677	C46 H93 O6 N2 P1	22.613	+H	3.28881e+06	247837	0	C	0	3289000	0	247800
							SM(d41:2)	SM	d41:2	d41:2	1	798.662	C46 H91 O6 N2 P1	20.878	+H	2.70487e+06	209178	0	C	0	2705000	0	209200
							SM(d42:1)	SM	d42:1	d42:1	1	814.693	C47 H95 O6 N2 P1	23.381	+H	1.45294e+07	1.21915e+06	0	C	0	14530000	0	1219000
							SM(d42:2)	SM	d42:2	d42:2	1	812.677	C47 H93 O6 N2 P1	22.042	+H	9.58782e+06	400811	0	C	0	9588000	0	400800
							SM(d42:2)	SM	d42:2	d42:2	1	812.677	C47 H93 O6 N2 P1	21.71	+H	2.13865e+07	1.50324e+06	0	C	0	21390000	0	1503000
							SM(d42:3)	SM	d42:3	d42:3	1	810.662	C47 H91 O6 N2 P1	20.242	+H	1382.23	120.832	0	C	5342	7384000	4241	512500
							SM(d42:4)	SM	d42:4	d42:4	1	808.646	C47 H89 O6 N2 P1	21.798	+H	1.85591e+06	146635	0	C	0	1856000	0	146600
							SM(d43:2)	SM	d43:2	d43:2	1	826.693	C48 H95 O6 N2 P1	25.687	+H	546.126	348.342	0	C	16020	8749000	3923	1367000
							SM(d44:2)	SM	d44:2	d44:2	1	840.708	C49 H97 O6 N2 P1	26.186	+H	5.72615e+06	591593	0	C	0	5726000	0	591600
							SM(d44:4)	SM	d44:4	d44:4	1	836.677	C49 H93 O6 N2 P1	23.383	+H	2.5718e+06	229223	0	C	0	2572000	0	229200
							SM(d44:5)	SM	d44:5	d44:5	1	834.662	C49 H91 O6 N2 P1	21.696	+H	3.14684e+06	266789	0	C	0	3147000	0	266800
							TG(18:1/18:1/20:4)	TG	18:1/18:1/20:4	56:6	1	906.768	C59 H102 O6	28.234	+NH4	1.04526e+06	165099	0	A	0	1045000	0	165100
