# Supplementary material for: A Stromal Lysolipid–Autotaxin Signaling Axis Promotes Pancreatic Tumor Progression
Source: Oxford University Press journal article supplement (doi:10.1158/2159-8290.cd-18-1212), 2019-03-05
Supplement: 21598290cd181212-sup-210399_2_supp_5369228_pnjzm2.xlsx [file 21598290cd181212-sup-210399_2_supp_5369228_pnjzm2.xlsx]

## Sheet: Sheet1
		LPA(pmol/mg)	KPC					KPC+ImPSC2
		(16:0)	6.1696	15.1535	7.17641	64.5537	6.22299	6.9731	9.98441	9.42139	9.83371	8.43497
		(18:0)	7.01399	24.6013	7.59932	6.61025	7.30576	8.57856	12.1115	12.3133	12.1082	11.0935
		(18:1)	37.7366	62.5858	75.6382	46.865	59.2953	92.0233	102.343	109.171	99.1124	104.402
		(18:2)	10.9728	9.96965	10.5634	10.2875	10.5184	15.1484	20.0148	18.4215	19.8082	15.0176
		(20:4)	4.80896	5.961	5.77752	4.3914	7.72748	8.95149	12.4401	11.6045	12.0416	12.8707
